# Supplementary material for: Screening of potential donors for anaerobic stress tolerance during germination in rice
Source: Front Plant Sci. 2023 Nov 10;14:1261101. doi: 10.3389/fpls.2023.1261101 (PMC10667690; doi:10.3389/fpls.2023.1261101)
Supplement: Supplementary file 5 [file Table_5.xlsx]

## Sheet: Selections
Name of genotype	Selection Category			Selection Index			GEBVs for Traits Across Arobic-Anaerobic Conditions								GEBVs for Traits in Aerobic (control) condition								GEBVs for Traits in Anaerobic condition
	Anaerobic	Aerobic	Across	Aerobic	Anaerobic	Across	Germination (14DAS)	Germination (21DAS)	Seedling Height (14DAS)	Seedling Height (21DAS)	Culm Diameter (mm)	Root Length (cm)	Shoot Dry matter (g)	Root Dry matter (g)	Germination (14DAS)	Germination (21DAS)	Seedling Height (14DAS)	Seedling Height (21DAS)	Culm Diameter (mm)	Root Length (cm)	Shoot Dry matter (g)	Root Dry matter (g)	Germination (14DAS)	Germination (21DAS)	Seedling Height (14DAS)	Seedling Height (21DAS)	Culm Diameter (mm)	Root Length (cm)	Shoot Dry matter (g)	Root Dry matter (g)	BLUPs (%) Anaerobic Germination across anerobic experiments (21DAS)
MWANGAZA	Yes	Yes		78.6462	26.0956	28.5991	69.4381	78.7836	22.6133	38.1374	2.13958	8.24964	0.0477676	0.011477	95.7006	95.1516	29.1859	40.9265	2.60152	8.97355	0.0661702	0.0123471	50.8324	70.9328	15.2884	34.766	1.65994	7.10794	0.0272572	0.00836946	70.7664
AFAAMWANZA1-159	Yes		Yes	-2.26028	46.0188	55.5152	79.8019	86.6681	23.7876	43.4539	2.23171	8.06144	0.058415	0.00981747	100.142	100.218	29.7907	48.1485	2.74348	9.11546	0.0818185	0.0140221	66.6043	81.3519	18.2984	38.3697	1.67038	6.79256	0.0320948	0.00598084	75.4206
KANAMALIA	Yes		Yes	2.30245	24.5104	40.7461	78.2018	85.6387	27.5758	46.1377	2.21504	7.98862	0.0625866	0.0124502	100.46	100.442	33.1545	50.6298	2.72616	9.25976	0.0820491	0.0150323	60.2834	74.2918	19.9791	39.5231	1.67487	6.85612	0.0353401	0.00892225	72.6258
ROJOMENA271-10	Yes		Yes	13.1486	31.3875	38.8215	77.838	83.7652	28.7157	45.9812	2.20186	8.26417	0.0590426	0.0109989	100.254	100.108	35.3058	50.2533	2.70776	9.01409	0.0779898	0.0123488	62.5044	76.0698	19.8458	40.6832	1.6656	6.75355	0.0354049	0.00796277	73.7266
TARABINZONA	Yes		Yes	15.051	25.2598	27.598	82.768	87.3992	24.6014	44.6452	2.20959	8.04727	0.0522513	0.0104117	100.62	100.435	29.7265	49.5637	2.6913	9.13957	0.0741214	0.0126734	74.5778	82.2379	18.7804	39.1406	1.67359	6.9121	0.0286704	0.00726333	79.5354
MAGONGOYAWAYUNGU	Yes		Yes	11.1129	27.7037	25.3242	78.5132	86.9293	29.3735	47.2303	2.28852	8.66446	0.0692592	0.0137761	99.931	99.87	36.6604	53.9347	2.80057	9.3705	0.097874	0.017966	58.5125	77.9825	20.0226	39.2821	1.67637	7.18542	0.0370001	0.00944729	75.2805
MPAKAWABIBI	Yes		Yes	-1.80872	26.4302	25.0684	79.5698	86.6141	25.0563	43.1167	2.21649	8.34246	0.0555716	0.0124305	100.222	100.11	31.9877	48.4695	2.71687	9.27903	0.0743672	0.0153336	64.9106	81.9265	17.9759	37.3698	1.67477	7.0895	0.0310524	0.00878854	79.6794
IB126-BUG2013A	Yes		Yes	-3.10016	24.8239	25.0269	75.4806	84.0413	20.9861	36.3502	2.17228	7.50129	0.0445716	0.0108193	100.49	100.462	24.7925	41.1787	2.69051	8.57035	0.0662031	0.0122645	55.5311	75.0146	16.8721	31.6561	1.66123	6.36791	0.0254228	0.00775799	69.6583
WAHIWAHI	Yes			2.48496	28.2494	16.5589	81.8744	89.0628	30.4631	46.3233	2.28939	8.97892	0.0661541	0.0142462	100.231	100.131	37.5048	51.3755	2.79365	9.45699	0.0910483	0.0186232	69.2908	87.9089	20.1856	40.9765	1.67699	7.35333	0.0370229	0.00978336	85.918
KUBWAJINGA	Yes			-7.62016	30.2851	8.60454	75.3701	83.1368	22.3668	37.7153	2.24378	7.09859	0.048975	0.0109746	100.095	99.9919	27.9909	41.4354	2.73746	8.4112	0.0714935	0.0151191	55.7954	73.882	16.3282	33.714	1.66112	5.9719	0.027201	0.00676488	70.5707
KALING-ANAULA		Yes	Yes	28.1233	9.63786	38.7465	73.0138	82.1724	23.0767	41.0715	2.21732	8.384	0.0584305	0.012683	100.238	100.194	30.4128	46.2548	2.72103	9.41893	0.0846781	0.0144088	49.7943	65.5014	16.5831	35.817	1.67507	6.93589	0.0289144	0.00952887	63.1452
NERICA 4		Yes		29.0002	30.3617	27.3511	68.6839	81.5906	19.822	33.7276	2.12483	8.49839	0.0414937	0.00954286	100.54	100.462	25.7794	37.8367	2.59971	9.15418	0.0600209	0.010692	38.4435	63.4716	14.5728	30.1335	1.66061	7.12733	0.0242676	0.00683033	55.2335
LUNYUKI		Yes		32.3172	28.9653	24.4762	70.8324	80.7799	22.973	39.6264	2.1491	8.05067	0.0460729	0.00823849	100.883	100.779	29.6074	44.815	2.62286	9.02253	0.071157	0.0113384	46.1436	63.3478	15.0109	33.8782	1.65982	6.91872	0.023551	0.00477486	64.1067
AFAAMELELA		Yes		33.6054	21.0889	22.4069	70.3472	80.7875	22.5192	38.5067	2.13354	8.17832	0.0456336	0.0100187	100.043	99.9004	28.6495	41.9186	2.6022	9.0254	0.0669085	0.0131053	43.4673	62.8967	15.3386	34.2291	1.65956	6.98623	0.0250972	0.00626571	59.6872
MBEGA		Yes		30.2955	3.07625	21.4232	67.0125	79.2227	21.5814	38.7654	2.18997	8.21146	0.0503943	0.00881237	100.56	100.466	29.849	46.718	2.70661	9.11615	0.0819349	0.0124067	34.5556	62.7232	14.7048	33.1284	1.66474	6.57378	0.0237004	0.00523117	61.7686
TUNDURU		Yes		50.7019	-12.8142	20.7942	66.8629	78.9354	24.2599	44.0635	2.19795	8.35152	0.0629963	0.0143332	100.927	100.766	33.6084	50.5709	2.71412	9.14878	0.0967186	0.0162081	32.7489	60.7993	14.7534	35.3097	1.66517	6.59848	0.0289005	0.0105225	58.157
IR16T1339		Yes		32.9666	-20.8018	-2.17929	50.5822	64.19	12.5194	26.6109	2.06639	6.67007	0.0250188	0.00630859	94.9493	94.6298	17.8612	31.9138	2.58568	8.30365	0.0441925	0.00955398	0.254593	19.9423	15.8755	23.5965	1.65725	5.9929	0.0143654	0.00337904	23.8544
LINE-8A-2		Yes		37.608	-11.2473	-2.52326	57.9703	76.4316	19.205	29.527	2.08989	7.99295	0.0350219	0.00815347	100.031	99.9148	25.9691	33.7059	2.57137	9.09384	0.0579182	0.0129235	11.405	50.7464	13.7823	26.9087	1.66005	6.85754	0.0182458	0.00402803	48.4914
IR15T1302		Yes		50.8176	-16.1956	-3.41233	49.9714	68.4683	14.3935	25.0512	2.09569	6.66541	0.0311427	0.0077832	96.9467	96.5132	20.4309	32.7064	2.60401	8.21566	0.0554502	0.0124921	-3.84857	37.356	13.5487	19.4562	1.65294	5.69201	0.01413	0.00371492	41.6271
NERICA2		Yes		36.9578	-11.648	-11.4352	59.9985	77.0904	18.0158	31.9923	2.10038	8.14666	0.035888	0.00902435	100.167	99.9764	23.2108	35.1512	2.56255	9.08719	0.0532402	0.0112443	16.6367	51.3082	14.0933	28.9007	1.66089	6.96522	0.0204094	0.00585294	52.2292
LINE-18-NIWUR1		Yes		28.8346	-4.0416	-20.5483	65.2904	76.941	22.8657	41.6881	2.22269	8.49271	0.0517685	0.0107251	100.072	99.9436	31.312	47.3564	2.69862	8.98925	0.0822983	0.0140541	30.1961	52.2171	14.2347	35.6949	1.66008	6.99701	0.0246295	0.00680388	50.2209
IRON		Yes		116.594	-13.1922	-35.233	48.8066	57.919	21.9536	38.1488	2.14512	7.47768	0.0425857	0.0105451	90.4848	89.2346	25.642	42.8225	2.63469	8.85478	0.0587264	0.012207	4.86647	17.9963	16.6248	32.8195	1.65852	6.49948	0.0263128	0.00727552	29.3794
CHIMDIMA			Yes	17.284	11.8968	35.9093	77.8686	84.1099	27.9664	46.896	2.18211	7.80726	0.0567015	0.00972596	100.613	100.491	36.133	53.2306	2.69424	9.19157	0.0847979	0.015628	57.193	71.8505	18.7836	39.4496	1.67286	6.69627	0.0291456	0.00525298	66.515
PISHORI-BROWN-			Yes	17.6283	23.4021	34.0521	75.8748	83.6628	28.7692	47.7701	2.23732	8.13563	0.0653012	0.0116927	99.9754	99.98	35.832	56.0104	2.74405	9.26831	0.0958274	0.0154816	55.4588	69.5723	19.6046	38.5569	1.67396	6.83323	0.0334596	0.00772657	66.9452
GIGANTE			Yes	10.7587	22.5899	32.7678	75.8934	83.8796	27.5381	44.1211	2.21757	8.17229	0.0578604	0.0100288	99.9028	99.8177	33.6168	49.814	2.72931	9.14174	0.0804423	0.0128334	54.9326	76.1096	20.008	37.9504	1.66913	6.71836	0.0331149	0.00663895	73.6986
FAYADUME3			Yes	8.03839	14.5891	27.556	75.7438	84.8243	27.9776	45.3419	2.24739	8.49827	0.0632644	0.0118128	99.9984	99.9124	36.3594	50.7639	2.77537	9.60048	0.0888244	0.0174725	54.2577	75.084	17.7741	39.3264	1.67574	6.96592	0.0320041	0.00729068	70.1376
FAYADUME1			Yes	9.88658	13.8638	26.3621	75.5361	85.4584	28.3162	46.5289	2.2495	8.46432	0.0651461	0.0117848	100.545	100.435	36.9363	53.6649	2.78058	9.60395	0.0926055	0.017787	52.4743	75.8396	17.6778	38.9914	1.67583	6.95101	0.0320866	0.00712194	72.9684
TOSA			Yes	19.6002	4.89366	25.8613	66.1771	80.2003	17.541	30.5181	2.0378	7.58195	0.0291589	0.00656619	99.7177	99.7566	23.9566	33.388	2.50761	8.87039	0.0438909	0.00793734	32.5769	63.5858	13.3207	30.0602	1.65808	6.83111	0.0184368	0.00405423	67.4586
RINGA			Yes	9.06492	15.0783	25.1393	79.7119	87.7218	27.0831	43.1574	2.2596	8.60027	0.0601888	0.0124833	100.412	100.314	34.2475	47.3165	2.76255	9.33657	0.0825089	0.0147496	57.6393	78.0091	19.913	39.5586	1.6758	7.21023	0.0350137	0.00915516	69.7304
KIVULI			Yes	10.4255	20.1524	24.9218	76.8338	85.1684	24.4411	42.2591	2.22154	7.897	0.0553799	0.0113456	100.378	100.262	31.1606	48.9467	2.72864	9.18466	0.0789982	0.0135675	54.8084	69.9669	18.3634	35.7031	1.67453	6.89565	0.0297502	0.00811829	64.6673
MZUNGU			Yes	-4.87988	25.8118	24.5056	80.0572	87.8194	26.2174	44.8938	2.23648	8.23971	0.0579586	0.0109365	100.588	100.573	32.6768	50.4274	2.7519	9.30873	0.0800209	0.0134989	62.2583	78.0194	18.9947	38.3414	1.67778	7.19666	0.0320194	0.00777776	66.338
HODIHODI				23.7179	8.76269	42.2185	52.4744	66.3477	18.0989	30.0469	2.12762	7.86129	0.0423876	0.00723507	100.813	100.693	24.2044	37.9293	2.70752	9.38368	0.069796	0.0130993	-0.124942	20.2248	13.8521	23.9453	1.66908	6.60245	0.0177067	0.00322264	28.6984
FAYADUME2				6.74233	22.2117	41.7414	70.3431	79.045	25.6254	45.5801	2.22742	8.23315	0.0652948	0.0124417	100.232	100.251	33.3939	52.7804	2.77325	9.65131	0.0932638	0.0179309	45.7203	60.6887	15.8351	36.5606	1.67399	6.6902	0.0302438	0.00789867	61.3506
CHAMOTA				-9.02797	20.5944	29.7598	73.7077	79.5656	26.9367	43.4634	2.18783	8.13969	0.0529831	0.00957518	98.1522	98.3302	32.9392	51.9829	2.69507	9.24949	0.0780143	0.012866	54.3623	64.5366	18.8464	34.6818	1.67244	6.76618	0.0264889	0.0061372	64.693
IR18T1015				20.73	-4.67028	28.7622	46.437	59.1896	12.153	26.372	2.00958	5.84729	0.0263758	0.00670494	90.8578	91.1046	17.1501	31.5414	2.47813	7.87394	0.0451585	0.00930123	1.32708	23.4494	13.4354	22.3415	1.65086	5.187	0.0153868	0.00392979	31.3781
MBUYU				23.7984	6.77719	27.9348	71.4811	83.9191	24.7274	43.7675	2.23609	8.76905	0.0641201	0.0128185	100.4	100.318	32.8626	48.6037	2.74867	9.48964	0.0881045	0.0154316	40.32	65.4357	16.9054	37.8313	1.67559	7.23908	0.033271	0.00943598	56.7877
FAYAKARONGA				8.41134	13.464	27.8679	71.0212	82.2444	23.3251	43.4727	2.21676	8.38662	0.0616588	0.0131978	100.185	100.101	30.7745	49.9386	2.74737	9.51121	0.0872802	0.019636	41.8077	64.8842	16.5964	35.9596	1.6772	7.09847	0.030716	0.00808183	59.1796
ZX117				11.5265	17.7811	25.3275	57.6253	68.5895	17.019	29.5382	2.09664	6.91509	0.0338592	0.0076528	100.191	100.096	22.6664	34.7582	2.61397	8.38167	0.0555242	0.0117196	14.7896	34.3223	13.0935	25.0207	1.65471	5.78909	0.0178872	0.0039269	40.0908
SHINGOYAMWALI				17.285	6.77944	25.0155	70.5877	82.1466	23.773	43.3639	2.21279	8.32662	0.0588277	0.010856	100.982	100.829	31.7187	51.2432	2.74744	9.49663	0.0876273	0.0172527	38.2363	61.8405	16.4786	35.6323	1.67671	7.07128	0.0280182	0.00624733	55.201
MASANTULA				19.6365	6.58052	24.2619	68.1599	79.8321	24.1044	43.0405	2.23107	8.34107	0.0606291	0.0108852	100.111	100.006	31.7872	48.5827	2.77547	9.62443	0.0872333	0.0150977	37.2391	59.9686	15.9769	36.604	1.67588	6.96482	0.0295953	0.00722001	56.6279
MAUAMEKUNDU				-1.74775	15.4253	24.0946	68.2229	78.8447	23.6637	44.0451	2.19776	8.07622	0.0597453	0.0122365	100.036	100.059	30.3217	51.8734	2.71279	9.38248	0.0827748	0.0173874	38.4418	59.7823	16.1994	35.5444	1.67179	6.58907	0.0306157	0.00771878	56.8106
MAGEREZA				-3.22316	33.1569	23.5218	68.8761	79.0388	21.1442	32.593	2.21491	7.5236	0.0465359	0.0107083	99.9999	99.8537	26.3788	37.3039	2.74199	8.82029	0.0659311	0.014663	43.6672	66.3118	14.7829	28.5253	1.66487	6.44998	0.0236822	0.00681644	68.8864
GOMBE				12.6728	5.62374	22.8172	73.0387	82.5568	25.0536	43.0206	2.18534	7.9741	0.0540184	0.0102992	100.351	100.293	31.6052	49.9449	2.70585	9.19198	0.079905	0.0132912	46.8519	62.128	18.2309	35.5129	1.6731	6.87354	0.0270833	0.00691046	60.5585
NONDO				-5.59253	12.4727	22.6281	76.408	85.6395	24.4178	42.8073	2.2076	7.98796	0.0558004	0.0118908	100.438	100.447	29.0032	47.8876	2.70899	9.27711	0.0750064	0.015143	56.7562	79.7328	18.4852	37.1299	1.67462	6.84887	0.0312152	0.00821186	78.1124
IR2793-80-1				8.06314	26.5653	19.5896	64.4899	77.8339	17.4132	29.2348	2.17504	7.0739	0.0405762	0.00972789	100.229	100.144	22.0583	32.8747	2.67423	8.43974	0.0596394	0.0122755	32.9164	61.4516	13.9503	26.2848	1.65821	5.9059	0.0224497	0.00632758	64.8416
SIMZITO				2.39251	10.9596	19.5407	69.3629	80.8893	23.6625	40.2449	2.23618	8.35159	0.0576916	0.0116401	100.376	100.26	31.0957	46.7643	2.77601	9.57125	0.0787256	0.0147966	38.4098	62.9421	16.1065	34.5775	1.67613	7.04087	0.0295976	0.0082888	59.1816
FARCAGO906				-1.10692	30.1538	18.8111	70.9478	80.4974	20.9469	37.2479	2.17723	7.52625	0.0465297	0.010626	100.377	100.379	26.4833	42.7712	2.66083	8.44126	0.0674197	0.0126536	44.9813	66.0654	15.2395	31.5191	1.65966	6.31373	0.026214	0.00727643	69.1647
KALAMATA				9.07046	0.853127	18.2241	68.7643	81.3639	25.3201	44.2113	2.23818	8.43834	0.0635089	0.0120422	101.271	101.205	33.6429	50.5522	2.78142	9.64206	0.0919018	0.0186435	35.1827	62.198	16.268	37.0453	1.67631	6.98893	0.0303752	0.0071715	56.2839
MBAWAMBILIMWEKUNDU				23.4664	-10.5089	16.7494	72.8811	84.0836	24.0275	44.9097	2.19348	8.0126	0.0561316	0.010085	100.506	100.372	29.8911	52.2946	2.69664	9.24707	0.0828335	0.0139193	39.1396	61.9591	19.1341	37.5212	1.67454	6.82196	0.029442	0.00639159	50.652
FAYAMAFUTA				3.03112	3.04021	16.3597	75.315	84.935	23.9903	44.6702	2.20183	7.95133	0.0564871	0.011722	100.425	100.36	29.7525	51.4497	2.70313	9.22992	0.0788548	0.0153247	52.6796	73.268	18.302	37.077	1.6729	6.65163	0.0295239	0.00783007	70.8418
CHAMBENA				8.48801	8.30228	15.976	70.9387	82.0868	24.4925	44.557	2.21918	8.35462	0.0592344	0.0110939	99.9878	99.9554	32.0977	52.0749	2.75121	9.48755	0.0878814	0.0164224	43.6997	65.5146	16.6251	36.3539	1.67669	7.07577	0.028535	0.00690712	70.0619
LINE11WARDA				22.9991	23.542	15.8523	67.729	81.1505	19.5656	33.8375	2.11539	8.39807	0.039459	0.00937547	100.623	100.505	26.1504	39.2859	2.59687	9.13479	0.0610827	0.0138163	35.5925	61.3927	14.1333	29.5049	1.66004	7.09194	0.0211064	0.00518561	60.8987
KIHOGO				-6.62699	21.6706	15.2709	68.7216	79.149	25.542	43.0864	2.24686	8.68591	0.0628851	0.0136633	100.407	100.374	35.4238	50.1991	2.78727	9.59473	0.0862621	0.0178162	35.8398	54.9152	15.9069	35.4617	1.67528	6.9779	0.0326795	0.00943319	51.7814
TEMERIN-381				24.3307	-1.60984	15.2602	71.6079	80.6163	26.9346	47.2662	2.2263	8.8732	0.0667381	0.0159624	100.175	100.079	34.7532	53.6508	2.71863	9.27257	0.0918462	0.0169276	44.3941	62.3619	17.532	39.8319	1.67217	7.21619	0.0352866	0.0124911	59.7044
IR13240-108-2-2-3				4.58793	2.54981	14.9322	67.9422	78.9678	19.4936	30.5704	2.10964	6.93213	0.0355256	0.010575	100.111	100.053	23.4816	34.3641	2.60475	8.47495	0.0532025	0.0124306	38.4254	62.3552	15.5846	27.511	1.65636	5.71941	0.0205684	0.00729305	61.7016
FAC56				19.0303	10.4546	14.9146	69.7934	79.3174	20.6516	36.0456	2.17544	7.51425	0.0471731	0.0128754	100.644	100.478	26.3171	41.0638	2.66296	8.44351	0.0678909	0.0121415	39.2041	59.4521	15.3328	31.1444	1.65966	6.30213	0.0266524	0.0103225	54.356
ITUMBULA2				-12.3041	3.90619	14.8892	72.2771	81.6925	24.3884	43.5981	2.233	8.50779	0.0576231	0.0111681	100.241	100.26	32.4705	50.7286	2.78215	9.7197	0.0849437	0.0181757	46.4351	65.7583	16.494	37.258	1.67625	6.96778	0.027207	0.00629736	63.0814
IR117834-12-1RGA-1RGA-1RGA-2				25.9554	-0.237951	14.8806	40.5674	50.0858	14.4534	24.6081	2.00478	5.80033	0.0223082	0.00665832	76.0809	76.5048	18.7475	28.8199	2.46473	7.90322	0.0379621	0.00828262	8.9313	25.1219	13.1797	22.536	1.65072	5.17767	0.0137952	0.00394563	31.7369
LINGWELINGWELI				20.9837	6.59492	14.4521	69.0796	81.8656	20.0001	35.3772	2.1014	7.76672	0.0366698	0.0069594	99.4314	99.4111	25.989	40.815	2.58209	8.93094	0.0579598	0.00902919	38.231	67.2363	14.8949	31.9552	1.65858	6.85942	0.0206958	0.00413767	54.8563
KISEGESE				-8.35762	11.7801	13.6669	70.993	80.5624	25.1508	45.105	2.23349	8.43526	0.0614703	0.0128036	99.9787	99.9481	32.7591	52.108	2.77855	9.69277	0.0854057	0.0179967	43.2766	61.5955	16.5764	36.9577	1.67633	6.94608	0.0308146	0.0083994	60.7327
RUMBUKA				-0.186648	17.1977	13.5661	66.2437	80.2026	18.6731	33.389	2.10456	7.99116	0.0375533	0.00861355	98.448	98.6896	24.5655	36.535	2.57079	9.03741	0.0543692	0.0109326	35.4577	64.4694	14.0313	30.5192	1.65972	6.95615	0.0220101	0.00543505	65.0076
ITA304				-23.2077	26.3938	12.9158	69.7691	79.2535	20.4307	34.9142	2.2117	7.50851	0.0459722	0.010664	99.5802	99.692	25.7949	39.2007	2.73001	8.43973	0.0683389	0.0144867	40.8503	57.2372	15.6016	31.1867	1.65875	6.09023	0.0251033	0.00662438	55.6587
LOYA				5.57077	-2.45339	12.435	70.0281	81.3499	26.2278	46.6823	2.21908	8.28611	0.0632828	0.0124656	100.321	100.259	35.576	54.3025	2.76592	9.62787	0.091628	0.0183162	40.5491	65.3144	16.2377	38.0385	1.67517	6.86557	0.0302443	0.00780205	69.3311
MPEMBUKE				20.7929	19.7262	12.1561	70.233	82.0739	22.3021	38.7441	2.15546	8.22061	0.0466493	0.00988838	100.948	100.849	28.3547	43.4995	2.62531	8.97018	0.066998	0.0121017	41.5594	66.0097	15.6349	33.9399	1.65985	7.12726	0.0260656	0.00649511	66.0781
KYELA				7.75879	8.28026	11.9482	70.7479	82.0839	23.7004	44.0018	2.20763	8.32878	0.0569798	0.0109988	100.334	100.222	31.3404	51.4889	2.74086	9.4991	0.0841786	0.0171252	40.8846	63.6379	16.5336	35.477	1.67692	7.07972	0.0278181	0.00647783	56.2539
KIHOGOREDMOROGORO				-8.23727	14.901	11.5673	76.3844	84.1283	26.8065	45.0466	2.1732	7.83328	0.0523523	0.0106514	99.9451	99.8847	35.1205	52.6062	2.68681	9.28897	0.0765953	0.0173706	55.5889	71.1295	18.3735	37.1252	1.67282	6.65064	0.0279643	0.005648	68.5242
WABS450				23.4283	10.9363	11.4942	65.0755	78.6076	18.5921	35.7025	2.14459	8.41564	0.0435617	0.00965958	100.227	100.145	25.9745	40.7269	2.62568	9.03544	0.0658942	0.0129282	26.1724	54.9868	13.7009	31.0756	1.65951	7.13921	0.0228591	0.00591851	50.7155
TXD306-SARO5-IMRPOVED				10.8522	5.04014	11.0751	55.6802	68.7268	19.1941	33.3091	2.22198	7.19719	0.0510271	0.0110284	100.401	100.209	26.2323	39.213	2.79231	8.69203	0.0816249	0.0181789	11.3147	37.403	12.2209	27.3903	1.65929	5.88624	0.0206451	0.0052888	40.5448
KOMBOKA				1.47195	-0.14775	10.9974	63.1197	75.023	18.3787	32.6506	2.16923	7.53719	0.0422829	0.0100978	100.512	100.382	23.4234	34.3786	2.70676	8.75584	0.0590252	0.0119443	25.4496	50.3263	14.4088	31.0525	1.66377	6.42598	0.0239334	0.00709481	51.2269
KATUMAHI				1.96606	19.1641	10.9267	78.3437	86.0587	28.7972	47.1622	2.28324	8.78174	0.0656053	0.013505	100.3	100.271	36.6117	53.4277	2.79213	9.43372	0.0948131	0.0186579	59.782	75.5157	19.76	40.3003	1.67668	7.18732	0.0348824	0.00884504	71.4841
AFAAKIKANGAGA				-6.89436	9.56263	10.3293	76.2731	85.3497	24.6727	43.2571	2.22713	8.30256	0.0541729	0.0104137	100.142	100.096	32.3453	51.1688	2.74648	9.32751	0.0782381	0.0138498	50.7111	70.1669	18.0784	35.6332	1.67633	7.10754	0.0276198	0.00685647	67.4949
FAYA14M69				0.422742	11.5247	10.1259	75.3569	83.4285	26.534	44.0423	2.22874	8.12241	0.0569577	0.0119252	99.7284	99.6231	33.1649	49.7649	2.74713	9.31891	0.0787513	0.0146742	53.7844	69.7213	18.791	37.2912	1.67704	6.99198	0.030931	0.00846264	69.5725
AFAAMWANZA				1.56719	-2.18784	9.91027	74.0384	82.8306	25.0383	44.1361	2.21956	7.89895	0.0556143	0.0109346	100.135	100.093	30.0606	49.5251	2.73505	9.26498	0.0804571	0.0152909	47.5724	64.6546	18.8138	37.8672	1.6761	6.90847	0.0288848	0.00683436	59.6723
NERICA7				23.6397	21.8692	9.55763	69.3289	80.749	21.1411	36.9553	2.16583	8.45408	0.0442546	0.00946052	100.302	100.179	27.702	42.4263	2.63628	9.03907	0.068593	0.0138573	41.5228	65.2116	14.8247	32.3547	1.65991	7.14236	0.0228081	0.00528607	64.3793
MOSHIWASIGARA				8.20401	-0.955329	9.32109	64.6962	79.3379	22.7876	39.0928	2.20984	8.01498	0.0539221	0.00962584	100.064	100.048	31.7414	48.4498	2.75242	9.45005	0.0843509	0.0154148	23.0917	54.3047	15.7629	31.2138	1.6753	6.89828	0.0250502	0.00537907	51.348
ZAMBIA				10.8613	0.210079	9.26288	69.7752	81.1024	23.8316	44.0202	2.21052	8.36899	0.058816	0.0126148	100.286	100.151	31.5484	51.7639	2.74119	9.49706	0.0859029	0.0180326	39.2081	61.4737	16.3159	35.9667	1.67651	7.05876	0.0286318	0.00810821	63.9605
IR127795-1121-1-1-2-1				-6.95777	-6.45612	9.11525	41.3174	55.5699	16.4754	28.001	2.07207	6.5644	0.0343962	0.00762136	80.2653	80.9172	20.3777	33.794	2.57507	8.45234	0.0533004	0.0114301	-0.445672	25.2101	15.2108	23.4623	1.65931	5.83681	0.0183036	0.00403328	31.5622
NEMEYUBUTAKA				24.0203	12.6546	9.09066	66.2154	80.3263	19.5032	34.0766	2.11169	8.04577	0.039829	0.00987849	99.3514	99.3017	25.5844	37.5404	2.57636	9.04759	0.056542	0.011243	34.2042	64.4767	14.0176	30.6538	1.66002	6.98014	0.0232845	0.0068915	62.4523
BARAMATA				10.5464	6.27739	9.08154	68.1861	80.6416	24.5886	43.3338	2.23792	8.40291	0.0595493	0.0106975	100.23	100.058	33.0479	50.0924	2.78135	9.64383	0.0879024	0.0188221	35.7309	62.4191	16.0023	36.4735	1.67624	6.98553	0.028533	0.00540704	58.652
MOSHI				8.13408	1.75977	8.65873	78.3075	85.7911	30.3674	45.2936	2.17316	7.78199	0.0525138	0.0104158	100.523	100.38	37.5507	54.5802	2.69077	9.19168	0.0796935	0.0139651	60.5089	77.9784	19.5958	36.437	1.6727	6.6893	0.0268466	0.00678239	73.5367
MWASUNGO				-4.99576	6.36855	8.59042	78.6656	86.776	26.4485	45.035	2.23873	8.26624	0.0573059	0.0117144	100.372	100.361	33.1992	51.0885	2.75052	9.31588	0.081736	0.0146274	57.6911	73.715	19.1456	38.4391	1.67793	7.18831	0.0304002	0.008277	69.3657
NIWAHI				1.41886	-2.24311	8.5473	68.8283	81.0372	24.1437	41.9423	2.23708	8.40947	0.0584214	0.0115552	100.214	100.153	32.3734	48.1052	2.78249	9.64204	0.08498	0.0176166	37.3579	63.8408	16.2057	36.5123	1.67618	6.98875	0.028662	0.00699292	70.112
KALIVUMBULA				-174.788	-0.255427	7.64717	64.5862	78.6321	19.2369	35.6746	2.03913	7.74042	0.0333289	0.00722896	95.7049	98.0933	25.3555	37.9827	2.51709	8.93003	0.0507783	0.00894125	35.323	60.0325	13.7299	32.8475	1.6586	6.86824	0.0194532	0.00447652	57.7285
USINIGUSE				-8.26208	11.6947	7.57722	75.5464	82.7212	25.6049	44.2219	2.23255	8.30196	0.0566231	0.0125131	100.335	100.236	32.4418	49.2539	2.75627	9.36875	0.0779635	0.0161893	55.8036	69.0222	17.7821	38.3743	1.67476	6.93911	0.0303663	0.00863516	67.8305
JARIBU				-2.83134	22.8306	7.24571	69.4447	79.2539	21.8424	37.8361	2.21039	7.97263	0.0483969	0.0104348	99.7846	99.6874	29.8833	44.434	2.72501	9.07634	0.0709548	0.014313	41.2676	62.1431	14.3467	31.7479	1.66911	6.82873	0.0242683	0.00664058	64.8947
SUPAINDIA				7.68643	1.68778	6.73379	64.1149	76.2145	24.1279	43.0776	2.2409	8.60635	0.0609224	0.0117532	100.105	100.025	33.1104	50.6899	2.78552	9.83816	0.089487	0.018504	30.8079	54.8541	14.7002	35.0046	1.67505	6.86844	0.0272749	0.0069593	54.6228
IR121183-5-2-1-1-B				63.228	-5.76202	6.28747	30.7873	38.1443	13.5142	26.923	1.99915	5.89635	0.023266	0.00625429	65.1322	65.2052	18.9652	30.8661	2.52573	8.01567	0.0425523	0.00985593	-0.34739	9.82437	12.511	23.5648	1.65214	5.39438	0.0124268	0.00292265	18.9319
IRRI214-TAI-				19.2067	1.19972	5.222	62.3306	73.9609	17.6103	33.0969	2.14146	6.8317	0.0396433	0.0100805	100.221	100.035	23.3844	37.3579	2.62477	8.15833	0.0617543	0.0132736	23.5038	46.1577	13.2567	28.6904	1.65279	5.62668	0.0204933	0.00630059	48.3368
LIMOTA				9.51391	-7.89981	4.99837	74.404	84.1433	22.7367	42.5881	2.1959	7.92876	0.0509935	0.010725	100.536	100.384	30.4183	49.0843	2.69753	9.23603	0.0745048	0.0140514	43.2658	66.4519	16.6719	36.4924	1.67352	6.76956	0.0269194	0.00716931	55.5143
SUPABCIMPROVED				-0.735876	-6.21183	4.66487	55.5165	68.7381	18.6115	32.2837	2.18462	6.78793	0.0477568	0.0124402	99.8461	99.7639	24.2608	37.1475	2.7408	8.31065	0.0722746	0.0161634	12.3265	38.8409	12.6151	26.7201	1.65533	5.68739	0.021259	0.00805028	45.6352
SUPAKIJICHO				4.38844	3.7972	4.40366	70.5963	80.8355	22.5843	40.2379	2.17395	7.76589	0.0469816	0.00953954	100.333	100.303	29.3072	45.9555	2.66611	9.07022	0.0679624	0.0113946	45.5852	62.8247	16.5764	34.104	1.66956	6.57235	0.0244661	0.00659965	62.2804
MWANAMATONGO2				5.96272	15.8504	3.82163	71.0316	81.6759	26.3946	42.7841	2.25146	8.62023	0.0588408	0.0116498	100.921	100.758	35.0599	51.6734	2.7854	9.62698	0.0885804	0.0183282	43.9854	64.4431	15.9452	34.5239	1.6769	7.1136	0.0270128	0.0068298	62.3834
IRRI213				22.5786	-12.4342	2.79772	63.8903	76.0344	17.8492	32.9231	2.10214	6.56408	0.0360767	0.00994074	100.087	99.9931	24.1392	36.3098	2.58656	8.12554	0.0589909	0.0112372	29.87	56.3505	12.5867	29.7584	1.65231	5.52506	0.0190969	0.00691241	57.6568
LIFUMBA				9.98456	-10.8716	2.50231	66.1324	77.2752	25.8348	43.731	2.23461	8.43688	0.0612933	0.0130328	100.605	100.522	34.8363	50.8824	2.77574	9.73703	0.0878761	0.0161662	33.4026	55.4665	15.3661	35.6814	1.67477	6.84147	0.0282681	0.00947272	48.6261
UMANHO				7.55337	2.22771	2.24606	71.2564	81.8443	26.9083	45.8018	2.21981	8.24196	0.0606296	0.0127712	100.562	100.466	35.7642	53.3947	2.73504	9.38354	0.0886549	0.0184557	42.5206	65.7369	16.9782	37.2497	1.67288	6.88663	0.0301999	0.00792771	65.8198
RANGIMBILINYEKUNDU				-15.6111	3.45621	1.97418	68.4971	78.9898	24.5685	42.7353	2.18485	8.03422	0.0510367	0.00927154	99.9847	100.068	32.5631	50.2466	2.71553	9.34649	0.074239	0.0132476	37.8462	59.5092	16.3746	34.8075	1.67247	6.78428	0.0259719	0.00576266	59.0968
SUMBAWANGA				3.8454	-4.35612	1.50825	69.6621	81.7475	24.5487	42.2573	2.2378	8.41897	0.0589298	0.0128631	100.812	100.655	32.7999	48.208	2.78551	9.64674	0.0842504	0.0181755	38.079	64.7706	16.1333	36.5895	1.67623	6.99654	0.0296815	0.00840752	63.8232
INTSINZI				4.41579	-22.257	1.49496	55.8735	75.0789	16.6297	29.2554	2.0965	6.6366	0.03501	0.00695779	99.7461	99.8716	22.4236	32.8014	2.61577	8.34032	0.0570619	0.0104861	8.33009	49.9969	13.6253	27.4527	1.6572	5.89395	0.0188131	0.00361206	54.0838
JARIBU220				-13.9681	23.2943	1.38222	69.6766	79.5747	22.3543	39.2388	2.2218	8.08017	0.0510233	0.0114854	100.172	100.228	30.0758	44.6435	2.72823	9.12265	0.0720319	0.0139806	41.7168	62.049	14.4036	32.8941	1.66977	6.85842	0.026838	0.00812604	57.9532
SOTEA				-6.66466	3.48211	1.18507	70.2514	81.1919	25.1335	42.0559	2.17401	7.81823	0.0489343	0.00873771	100.159	100.069	32.5512	51.1278	2.73044	9.31427	0.0747201	0.0134125	40.7463	61.0867	17.4193	33.0657	1.6734	6.73968	0.023887	0.00498265	60.3748
TXD88IMPROVED				-2.85545	19.7387	0.379975	52.8199	65.4126	18.9135	33.8572	2.23505	7.25005	0.0508233	0.0106392	100.069	99.9558	26.042	38.4853	2.78542	8.73666	0.0727171	0.0142389	5.86338	28.4754	11.614	27.1834	1.66006	5.86633	0.0243201	0.00687396	35.091
MKIAWANYUMBU				8.25073	-1.84801	0.256518	74.8782	84.2192	25.4985	43.628	2.23532	8.08736	0.0572397	0.0129909	100.12	100.072	32.2915	48.4831	2.71921	9.20103	0.0794082	0.0139891	51.8642	71.3065	18.4201	38.1774	1.67295	6.8713	0.0315582	0.00992755	67.6311
KACHIKOPE				-0.348969	0.281586	-0.297675	71.6812	82.7728	24.6006	42.0701	2.21341	8.10215	0.0541713	0.0115999	99.4088	99.3751	31.7311	48.2635	2.74017	9.29759	0.0785212	0.0147752	42.5561	65.1691	17.4851	35.2229	1.67564	7.00333	0.0283764	0.0079912	67.861
RUMBUKABUG2013A				23.3346	11.3193	-0.3566	69.5257	80.5202	20.9336	38.5102	2.16189	8.26376	0.0445158	0.0103152	99.6108	99.5412	26.5247	42.4801	2.62763	8.99439	0.0668618	0.0120383	42.7616	64.2642	15.5602	33.7575	1.66026	7.14153	0.0243442	0.00708408	66.5338
TXD307				-10.539	-12.316	-0.564861	51.269	66.1401	16.3708	29.3181	2.14551	6.64083	0.0378852	0.00810842	99.5471	99.4331	22.4825	34.7151	2.74451	8.4125	0.0619946	0.0136978	0.669403	33.3682	11.5335	24.0117	1.65504	5.58766	0.0155916	0.00384035	34.5579
KIGEGA				-11.0929	-4.74017	-0.635648	53.4135	64.569	16.973	30.4533	2.13545	6.84733	0.0368118	0.0094541	100.017	100.036	23.1908	35.0389	2.66661	8.61232	0.0597506	0.0155259	6.17058	22.0112	12.4845	26.4255	1.65895	5.75899	0.0170679	0.00478176	29.4965
CYICARO				18.1076	15.1029	-0.863209	69.1399	81.1898	21.3039	36.75	2.14341	7.9923	0.0396916	0.00787459	100.398	100.364	27.8973	42.1053	2.60501	9.01621	0.0624869	0.0106867	40.3477	63.6974	14.7776	32.1319	1.66017	6.9825	0.0211956	0.00460345	59.9041
JAMBOTWENDE				10.3657	-3.30161	-1.06219	68.1778	82.616	19.7857	36.8677	2.10084	7.71367	0.0383148	0.00820394	100.126	100.145	26.1399	43.5466	2.57558	8.90379	0.0591441	0.0104901	33.863	68.8116	14.6657	31.6334	1.65864	6.8353	0.0213198	0.00504782	65.1669
FASHINGABO-BUG2013A-				-8.56633	20.5863	-1.29608	71.9701	80.1454	22.7487	39.6571	2.24052	7.83587	0.0497103	0.0104178	100.083	100.047	28.9421	46.5775	2.76021	8.66248	0.0767441	0.0128981	48.9596	64.744	16.3846	31.7021	1.66267	6.4806	0.0239242	0.00700866	66.8146
SUPAKIJIVU				-33.8327	-4.0601	-1.30813	60.6957	73.7303	23.6591	41.9379	2.22683	8.52862	0.0583141	0.0112338	97.8509	98.2232	32.9506	50.3472	2.78487	9.86917	0.0869515	0.0188965	23.6771	48.3218	13.8683	34.106	1.67494	6.82969	0.0252625	0.00615336	60.4779
IR117842-11-1RGA-1RGA-1RGA-2				-159.51	-5.62433	-1.35935	44.041	60.6349	15.5453	25.1116	2.01779	5.90181	0.024649	0.00593203	88.1559	90.4246	20.9404	31.1731	2.49439	7.88584	0.0429744	0.00887547	-3.71901	24.8603	12.7924	20.9324	1.6506	5.19554	0.0143465	0.00303869	25.1057
NERICA1				16.1298	-3.12154	-1.44909	56.5731	72.3208	19.3241	33.0154	2.11316	8.01456	0.039811	0.00888921	96.9172	97.1022	25.2074	38.1597	2.5829	9.08655	0.0605294	0.0111734	11.3084	37.5477	14.3557	28.8471	1.66001	6.83309	0.0213784	0.00571049	33.0368
TERIMBERE-LL29-				-3.24824	6.81398	-2.02532	68.6264	79.328	20.1178	33.6427	2.18141	7.19981	0.03958	0.00916136	99.8502	99.7704	25.0921	37.3929	2.67811	8.12315	0.0621792	0.0128718	41.1475	63.0381	15.6699	30.8301	1.65264	5.72263	0.021368	0.00533939	63.3385
CHUPA				0.235674	2.24769	-3.14948	69.6458	81.5519	25.5403	43.4173	2.22493	8.15027	0.0558423	0.010174	99.9167	99.9009	34.2613	50.1253	2.73563	9.48518	0.0801604	0.0145536	41.095	67.5621	15.8586	36.205	1.67393	6.68742	0.0279155	0.00638935	67.7619
BG90-2				-10.8971	2.77656	-3.25627	48.8202	63.5768	16.2757	26.0435	2.15622	7.13415	0.0361441	0.00878474	99.7852	99.8434	21.5016	30.691	2.70628	8.50597	0.0589334	0.0131309	-4.97973	17.5623	12.0067	22.8238	1.65669	5.94822	0.0170404	0.00489813	20.4429
SUPAKATRIN				2.06838	-7.5987	-3.26579	65.051	77.4004	23.2412	41.8038	2.24698	8.63584	0.0600384	0.0135458	100.291	100.225	31.644	47.9027	2.78306	9.7257	0.0869139	0.0197543	29.4496	54.2921	14.8118	34.9477	1.67552	6.95069	0.0277518	0.00861708	57.1711
SERENA				-24.4706	6.72488	-3.39136	50.4498	65.3388	18.3169	27.063	2.15732	6.79668	0.0370942	0.00822008	100.539	100.51	24.393	36.7884	2.76297	8.5348	0.0660049	0.0156984	-2.76706	23.8915	11.4731	19.9663	1.65576	5.62316	0.0135346	0.00310313	26.1972
FASHINGABO				-3.71414	7.15003	-3.46382	71.1791	80.4415	23.2007	36.9311	2.24073	7.83581	0.0480177	0.0106593	100.518	100.433	28.849	43.6595	2.76409	8.67255	0.0756776	0.0133822	43.7167	64.5905	16.4369	30.964	1.66269	6.46525	0.0229608	0.00710553	61.8234
CHEREHANI				2.4721	-7.00246	-3.64604	61.1864	73.9423	24.1137	41.7822	2.23194	8.57725	0.058184	0.0113946	99.816	99.68	33.6116	50.0405	2.79119	9.87466	0.087803	0.0206326	20.582	45.4286	14.0167	34.0042	1.67495	6.84731	0.0246714	0.00551243	41.2267
IRRI79511-GWIZUMWIMBU-				-7.92937	0.811634	-3.82026	54.5835	71.3511	18.081	27.4884	2.10231	7.10654	0.0354612	0.0102099	99.7953	99.829	25.5391	35.5119	2.6243	8.25081	0.0591408	0.0154523	2.29892	32.5716	13.0178	21.3304	1.65243	5.74316	0.0170793	0.00560372	32.9169
MWANZA				-11.0324	3.98695	-3.92607	67.8349	79.7095	24.9281	43.7562	2.21346	8.21828	0.0563963	0.0110758	100.207	100.254	34.1866	51.6868	2.74446	9.4497	0.0805114	0.0144899	36.5716	60.7354	15.3243	35.1235	1.67396	6.81979	0.0279767	0.00754268	58.7958
MWARABU				8.23842	-8.47923	-3.98843	64.1016	76.9984	23.642	42.3277	2.24587	8.64109	0.0583636	0.0109488	100.226	100.149	31.889	48.6983	2.78741	9.85423	0.0877597	0.0182077	30.8944	57.7276	14.5741	35.8296	1.67521	6.87019	0.025856	0.00605557	63.8586
SIFARA				7.9621	-9.91933	-4.16826	60.1803	73.648	23.1786	43.7304	2.2312	8.55419	0.0611528	0.0120891	100.326	100.211	32.6921	51.2492	2.78735	9.87708	0.0884367	0.0180078	16.5975	42.1691	13.7966	34.7766	1.67523	6.83985	0.0276932	0.00760211	38.9316
NAWATULENABWANA				-14.4089	5.63123	-4.87778	53.4873	65.9484	19.3148	31.1776	2.23201	7.26745	0.0457851	0.00953369	100.208	100.241	26.3974	37.9595	2.78415	8.75088	0.0738371	0.0152804	5.0269	27.579	12.0033	26.3111	1.6603	5.89072	0.0196912	0.00497997	29.4204
GAKIRE				9.70378	-21.1674	-5.08524	56.1386	73.7761	18.0168	31.4861	2.09687	6.63454	0.0386855	0.00981287	99.707	99.7653	22.9714	34.7726	2.61059	8.30158	0.0596118	0.0116945	12.5935	47.3868	13.6394	28.0831	1.6566	5.85654	0.0207778	0.00662069	47.6052
TXD85IMPROVED				-0.729297	11.0727	-5.12122	52.0823	66.3947	17.8678	32.1298	2.20127	8.16271	0.0458249	0.0100257	100.555	100.472	25.1301	36.6019	2.74791	9.35434	0.0655644	0.0136359	3.76022	27.7439	10.782	27.2143	1.66723	6.56067	0.0218972	0.00661584	32.7191
IR127793-849-1-1-1-3				-6.01743	-3.95714	-5.17263	36.642	46.3946	15.2592	29.6325	2.0537	6.75392	0.0294977	0.00696144	64.1729	65.0355	20.9573	35.3261	2.56438	8.19372	0.0492285	0.00994569	9.75676	28.041	14.9347	25.6142	1.6543	5.99558	0.0168545	0.00407115	31.2462
DOMOLAFISI				0.70709	4.28925	-5.24541	74.6843	84.4394	26.8346	44.8264	2.2354	8.23405	0.0559009	0.0106724	100.297	100.177	34.0776	52.3652	2.74043	9.2992	0.0798797	0.014079	48.8886	71.8013	18.5018	36.974	1.67585	6.99712	0.0297292	0.00710401	69.3881
TONDOGOSO				-0.145689	-13.9157	-5.51801	68.2469	79.9694	22.3262	42.0293	2.17966	7.79404	0.0488366	0.00921569	100.471	100.398	29.743	51.4375	2.70118	9.24607	0.0755557	0.0139432	29.1653	53.9635	17.02	33.5005	1.67297	6.68322	0.0242384	0.00535171	49.9697
FRX78-12				-12.5011	-8.7675	-5.5626	50.2695	65.1112	17.1902	28.7626	2.15209	6.5909	0.037598	0.00810569	99.3464	99.2796	23.3073	35.3994	2.743	8.39368	0.062109	0.0126139	-0.875337	29.6459	11.649	22.7454	1.65519	5.56987	0.0154386	0.00428979	32.7378
MBAWAMBILINYEUPE				2.83904	-7.84336	-6.11889	61.2502	74.154	23.5736	42.5499	2.22725	8.53873	0.0563343	0.00973021	99.7659	99.6808	32.5632	50.499	2.78608	9.86945	0.0846969	0.0165648	21.844	47.2463	13.9469	34.5817	1.67479	6.8239	0.0245921	0.00516861	42.4412
LIFUWU				-2.98277	-4.70733	-6.83025	52.7776	67.439	17.6997	29.5516	2.16494	7.44472	0.0405379	0.0101516	99.9667	99.9237	24.5245	33.9146	2.73358	8.67608	0.0646799	0.0135583	2.84448	27.2239	12.0377	25.966	1.65882	6.13033	0.0192869	0.00641384	30.7759
WITA9				13.268	-16.0141	-7.4472	69.7889	84.7779	22.6941	34.871	2.15798	7.00323	0.0428656	0.0102001	100.236	100.103	24.3586	36.547	2.62125	8.25852	0.0562045	0.00998133	41.2667	75.5778	19.4672	33.4789	1.65717	6.02395	0.0280231	0.00778709	70.2338
SINDANONYEUPE				-11.0058	-11.118	-7.49518	68.0623	80.6043	23.7157	38.0427	2.14296	7.62158	0.0438427	0.0100655	99.9973	100.014	31.0495	44.3595	2.65486	9.18382	0.063037	0.0135502	33.8091	57.9067	16.8828	32.1176	1.6721	6.68046	0.023446	0.00647194	56.7165
TUNDURUDIHIMBA				-14.9539	9.79018	-7.64928	71.3115	83.1488	26.5994	46.9498	2.24967	8.55177	0.0632189	0.0128757	100.249	100.268	33.9499	52.9879	2.75829	9.36985	0.0859771	0.0188522	42.281	64.0382	17.606	39.46	1.67657	7.27704	0.0334746	0.00791384	62.2957
K5				-9.57252	8.99593	-7.72446	65.7494	76.7002	21.8178	37.1476	2.24537	7.68823	0.0524769	0.0129452	100.598	100.526	27.1842	40.7945	2.74673	8.71174	0.0708554	0.0149688	30.1792	50.7449	16.2002	33.6871	1.66302	6.27037	0.0304992	0.00935841	47.871
LINE16				24.0686	3.82143	-7.98668	66.3666	79.1989	22.6345	38.7859	2.16827	8.43289	0.0463899	0.00998292	100.109	100.029	29.31	45.2705	2.63109	9.07389	0.0722044	0.0139353	30.8283	56.0617	14.9388	33.2627	1.66025	7.12347	0.0235245	0.00588323	58.5358
KIJICHO				20.8495	-31.6888	-8.00117	58.9266	74.7164	23.7189	37.744	2.12061	7.78516	0.0445499	0.00833637	100.314	100.16	32.5916	45.4861	2.65461	9.38278	0.0710694	0.0144173	9.45325	41.6079	15.2153	30.555	1.67034	6.50506	0.0202199	0.00402883	41.9148
MABULA				-13.489	8.55247	-8.0212	50.4196	63.7616	17.1346	28.3172	2.16881	6.82761	0.0360296	0.00728937	100.168	100.127	23.3116	35.0967	2.72096	8.49454	0.0583594	0.0111041	-0.565602	22.3005	11.5495	22.7	1.65683	5.65649	0.0163838	0.00396222	28.7033
WAT317-WAS-B-55-11-3-5-1				-21.6326	11.1591	-8.07151	70.8224	81.5912	20.7183	35.121	2.20323	7.51535	0.042462	0.0102009	100.059	100.084	25.503	40.2698	2.71155	8.81632	0.0633493	0.0143005	44.3824	68.443	15.6303	30.542	1.66474	6.41401	0.0223641	0.0062541	66.1354
FRX472				3.9791	0.772336	-8.1976	65.9497	80.5043	18.4536	34.2791	2.22974	7.77447	0.0481855	0.0117461	100.378	100.236	24.3137	38.6988	2.74987	8.91367	0.0714495	0.0156655	30.9746	63.8674	15.1196	30.3051	1.6672	6.57223	0.0251129	0.00765131	60.3154
KAGIHA				-43.712	-13.7005	-8.25115	50.326	65.7023	16.7139	30.1002	2.15264	6.70286	0.0384808	0.00789564	97.628	97.9744	22.8907	34.9717	2.74765	8.42368	0.0625893	0.0126036	1.64502	35.1863	11.5757	24.4064	1.65519	5.59883	0.0159721	0.00404718	45.0112
MBAWAMBILIKYELA				-10.267	-9.68129	-9.43175	60.9675	73.9648	25.1438	44.0441	2.23471	8.59729	0.0606321	0.011658	99.3545	99.4439	35.0981	52.2044	2.79204	9.87587	0.0901343	0.0187079	21.0508	45.9995	13.9619	35.3237	1.67496	6.84763	0.0263849	0.00649117	39.6364
KALALU				-13.2517	7.18863	-9.50021	61.5165	73.2762	19.3212	32.9476	2.1106	6.98846	0.0333716	0.00781098	100.14	100.094	24.7269	36.0747	2.60155	8.06946	0.048054	0.010692	25.0997	45.7184	14.0099	30.4056	1.65015	5.68573	0.0209566	0.00449042	51.0193
KACHAMBO				-30.2366	-7.83595	-9.80214	70.0919	82.2521	23.9557	40.6102	2.22241	8.11663	0.0525859	0.0113977	98.0783	98.3764	31.4261	47.6835	2.74606	9.29727	0.0777675	0.0152365	39.5258	65.3032	17.4492	34.784	1.6757	7.015	0.0271769	0.00753618	53.2855
FAYA-CHIKUYUMANYONI-				7.8185	-7.28494	-9.94125	78.1097	86.2157	28.8398	46.7323	2.28818	8.85143	0.0644464	0.0152197	100.664	100.543	37.3775	53.4002	2.79086	9.41951	0.0916623	0.0163098	52.9104	71.0193	19.9174	40.4069	1.67706	7.28708	0.0353842	0.0119612	60.2926
FRX92-14				-6.54162	-22.0764	-10.6524	51.0639	64.2474	17.5246	30.6636	2.14151	6.41032	0.0364172	0.00778347	100.231	100.225	23.0344	34.0844	2.68641	8.02971	0.0584502	0.00996405	-0.434454	20.877	12.67	27.8337	1.6509	5.49439	0.0176292	0.00484246	27.1129
KALUNDI				-2.99365	-1.71229	-10.6919	67.1694	80.2871	24.7672	40.0549	2.18475	8.12863	0.0483787	0.00912739	100.047	99.98	32.0097	49.0421	2.7173	9.10553	0.0731354	0.0122458	29.2185	56.3727	17.8651	32.4061	1.6715	6.99429	0.0260914	0.00578565	54.6777
JYAMBERE-BUG2013A-				0.158631	-16.6448	-11.0743	61.4666	72.7866	22.5451	37.4553	2.12517	6.97901	0.0404372	0.00856236	100.019	100.063	29.8785	44.1737	2.64543	8.30157	0.0700813	0.0128621	23.8318	43.5827	14.3915	30.1715	1.6526	5.68889	0.0175048	0.00455923	46.5593
RANGIMBILI				5.96623	-14.2822	-11.8745	69.1857	80.3921	27.2704	47.3029	2.21517	8.20553	0.0580945	0.0103296	100.5	100.354	36.6434	55.4196	2.7625	9.60698	0.0877013	0.016265	37.1153	60.9034	16.4575	37.9884	1.67513	6.85371	0.026993	0.00597183	54.3085
NDAMIRABAHINZI				15.7966	8.52453	-12.0885	69.4277	81.3333	23.4783	40.3755	2.1603	8.21179	0.0439723	0.00839882	100.615	100.563	30.6233	46.4521	2.63641	8.96912	0.0682736	0.0100887	39.8007	63.5445	15.3673	34.0089	1.65961	7.11988	0.0232029	0.00549912	57.9036
FAYADUME5				1.55885	-7.57426	-12.2529	54.3109	67.4189	20.0627	31.2641	2.2096	6.98741	0.0437228	0.00965259	100.081	99.9262	25.7052	37.5652	2.74322	8.40133	0.0694995	0.0144922	4.24387	28.4302	14.1397	25.8748	1.6574	5.82099	0.0197055	0.0053958	31.9464
SUPA				-0.497105	-11.3288	-12.3542	63.0377	77.9364	25.0637	44.9241	2.2376	8.61075	0.0621929	0.0118801	100.301	100.25	33.2015	52.3383	2.76521	9.66553	0.0875665	0.0185832	24.5875	56.9711	15.6613	36.8066	1.67377	6.87468	0.0300819	0.00696016	58.1192
MLEKEALONGOLE				20.8032	-17.207	-13.5496	65.4277	79.6549	23.2028	38.8882	2.2164	7.55168	0.0533398	0.0123586	101.125	100.927	29.6936	45.7602	2.74303	8.73482	0.083758	0.0157171	31.5317	62.4136	15.6336	31.3922	1.66264	6.37526	0.0239259	0.00839017	60.4427
SATO9				-7.6707	-0.725947	-13.8268	51.9717	65.5018	17.5902	30.7366	2.2265	7.32704	0.0435309	0.0090786	100.169	100.101	23.888	34.7969	2.77971	8.81431	0.0651009	0.0117483	1.65976	28.4183	11.5901	26.7055	1.66148	5.94767	0.0209937	0.00598788	35.3898
SUKARI				5.15013	-14.8959	-13.9887	64.4191	78.3583	24.2749	44.5121	2.23583	8.23992	0.0588924	0.0106822	100.147	100.082	33.6028	51.9924	2.76955	9.55339	0.0874559	0.0164008	28.2568	59.5152	14.9823	36.2767	1.67444	6.72879	0.0272517	0.00630553	60.5392
MBAWAMBILI				2.30139	-19.2827	-14.1396	61.2041	74.8988	23.5509	43.4298	2.23735	8.59149	0.0603727	0.0126626	100.2	100.099	32.9796	51.005	2.79491	9.88651	0.0888892	0.0194166	19.8801	47.9028	13.8703	35.2443	1.67517	6.84506	0.026706	0.00774998	51.8496
UROO1IMPROVED				18.2866	-27.5899	-14.7677	62.5213	76.1376	25.127	44.4476	2.24503	8.64743	0.0623152	0.0129337	100.402	100.293	34.0608	51.5396	2.78568	9.8506	0.0939117	0.0187396	25.5028	54.24	14.5575	36.1807	1.67496	6.86313	0.0265832	0.00832465	62.6482
DHAHABU				-7.16899	-17.4039	-15.0251	68.2343	80.2725	23.5002	41.4774	2.15688	7.6704	0.0452883	0.00876137	100.262	100.19	31.8361	49.4073	2.6776	9.24336	0.0664735	0.0118399	29.1077	51.8689	16.8155	33.666	1.67272	6.60847	0.023676	0.00561374	47.1107
KILOMBERO				-2.38951	-13.3011	-15.0427	60.0845	73.7078	23.2728	42.9697	2.23548	8.56823	0.0580556	0.0110392	99.8473	99.8114	33.0586	51.2092	2.79057	9.87682	0.0866607	0.017566	17.4709	43.9805	13.7899	34.5989	1.67522	6.84321	0.025604	0.00625422	38.7304
NERICA10				11.5686	-25.8047	-15.352	57.0979	76.5479	17.9796	30.6379	2.08171	8.04169	0.0347981	0.00893422	98.4325	98.6351	23.7076	34.8654	2.56574	9.1005	0.0568509	0.0124499	13.0664	56.3586	13.678	27.5189	1.65987	6.90512	0.0179071	0.00522718	60.133
DUORADOPRECOSE				23.6031	2.50496	-15.668	65.1577	78.8471	22.6479	40.1755	2.16816	8.44033	0.0473497	0.00985991	100.27	100.214	29.8196	46.1295	2.62997	9.07279	0.0721319	0.0126107	26.2857	54.0207	14.8307	33.2347	1.66028	7.12276	0.0248036	0.00629764	50.4128
IR16T1067				-51.8132	-3.28101	-16.8119	27.1644	33.6373	12.1851	31.9701	2.08486	6.58129	0.0312245	0.00658218	49.8008	51.4363	17.7126	37.5982	2.59737	8.19145	0.0530697	0.0106595	6.65661	18.3921	15.375	25.71	1.65367	5.65703	0.0169262	0.00365807	24.2645
FAYADUME4				-15.1086	-3.54467	-17.2982	51.6289	66.6687	16.3908	30.7968	2.15511	6.69298	0.0390465	0.00956691	99.6703	99.6485	22.0591	35.8172	2.71489	8.20965	0.0592597	0.0112534	3.11685	32.9353	11.8852	25.1886	1.65388	5.69212	0.020009	0.00653661	40.1958
EDIGET-WAB189-B-B-BHB-				-1.30047	1.14638	-18.553	67.3254	78.3564	23.4054	39.754	2.15829	8.0265	0.0454099	0.0114174	98.2706	98.4208	29.1093	46.1439	2.61538	8.9504	0.0703727	0.015646	39.5478	64.424	15.6723	33.4949	1.65924	6.79429	0.0240213	0.00691541	65.7629
V18				-38.1211	7.75185	-18.8253	58.6458	71.2933	17.9887	31.6094	2.18364	7.53021	0.0395172	0.0103669	96.5491	96.8335	24.2202	36.2044	2.6996	8.43836	0.059752	0.0141494	19.9192	46.8257	13.1247	27.5112	1.65791	6.2707	0.021033	0.006384	46.7262
MBAWAYANJIWA				-4.06626	-20.7602	-18.9051	69.4118	79.7174	22.4363	42.0845	2.19776	8.32465	0.0503777	0.0125481	100.228	100.206	28.2643	47.2905	2.69229	9.25454	0.0704092	0.0136718	36.7603	54.9289	17.4018	36.5583	1.67434	7.0343	0.0277555	0.00958231	53.1178
MDOMOWAFISI				-4.18941	-19.1753	-18.9653	60.9193	74.6117	23.4362	43.1966	2.23013	8.53221	0.0586758	0.0124576	100.469	100.391	32.4752	50.7162	2.78871	9.87552	0.0862677	0.0193197	18.3521	45.9202	13.9312	34.5022	1.67512	6.83188	0.0259395	0.00743708	45.229
GAMTI				-1.49677	-23.7052	-19.7696	63.7473	75.485	24.0516	42.9216	2.21621	8.35926	0.0542488	0.0113513	100.084	100.078	33.1445	50.5822	2.74776	9.45326	0.0850075	0.017583	22.407	47.5049	14.7478	34.8025	1.67204	6.81583	0.0239968	0.006595	47.3678
MSONGA				5.66957	-15.8801	-21.0311	50.1851	65.4929	17.1434	30.3149	2.12724	6.77727	0.035267	0.00819917	100.952	100.797	22.79	35.0364	2.66086	8.48368	0.0561826	0.0113037	-0.929907	28.196	11.9444	25.7093	1.65729	5.73773	0.0175896	0.00486632	38.5697
SINDANOKUBWA				14.377	-2.66738	-21.0848	69.5939	82.9126	23.2208	40.0889	2.12097	7.82202	0.0417875	0.00984927	100.422	100.329	30.2306	46.2288	2.59643	8.94184	0.0656945	0.0135252	40.0103	70.9319	14.8992	32.822	1.65924	6.87793	0.0218113	0.00582742	75.2171
SATO1				-31.6387	9.26521	-21.6369	54.6918	67.7037	18.2306	30.7565	2.24034	7.20583	0.0427472	0.00926524	100.469	100.528	24.9973	35.737	2.78731	8.6657	0.0650128	0.0136326	11.5235	37.977	11.8295	26.5327	1.65936	5.84276	0.0203646	0.0053606	49.2726
BASMATI				11.5211	-10.4999	-21.8656	63.8767	76.1818	19.9456	32.6025	2.17011	7.24836	0.0389207	0.0110716	99.5668	99.3709	23.5537	36.132	2.67466	8.25637	0.0614032	0.0128345	36.6249	64.8761	14.9974	29.2336	1.65284	5.92924	0.0203763	0.00772398	69.7624
MBAWAMBILIRANGIMBILI				-1.61505	-10.2263	-21.9171	69.9649	81.689	24.2942	44.1776	2.20224	7.61591	0.0525829	0.0112436	100.174	100.119	32.4011	51.6068	2.70708	9.05455	0.0769116	0.0134104	39.4113	62.4145	16.6377	35.8043	1.67015	6.4683	0.027642	0.00808718	59.9946
BR				-19.1375	-3.93149	-22.0907	76.1516	82.3359	30.5824	48.1133	2.22613	7.8441	0.0553212	0.01139	99.9748	99.9584	35.394	54.8303	2.71059	8.98288	0.0765245	0.0144564	55.8783	68.9428	21.9761	40.5063	1.66612	6.54269	0.0323645	0.00758001	65.8093
SALINAS27				8.67082	-31.5542	-22.797	54.5727	70.4707	16.0442	29.7787	2.14301	6.60246	0.0332098	0.00701066	96.9114	96.7592	19.7702	32.8667	2.66453	8.35691	0.0512564	0.00962185	8.17047	40.0491	15.2969	27.9008	1.65827	5.88961	0.0182263	0.00424537	43.169
THEMANINI				-4.99303	-25.1524	-23.1589	66.4905	78.7771	23.8706	39.9794	2.16937	8.19125	0.0454703	0.0100371	100.459	100.402	31.7244	47.7356	2.68731	9.31169	0.0702344	0.0145213	27.8709	52.7719	16.8628	33.0915	1.67253	6.76892	0.0226771	0.00610197	47.2946
SUPAUKEREWE				-7.0398	-19.7185	-23.6032	68.406	79.7681	24.767	44.3912	2.24798	8.21392	0.0575277	0.0125171	100.314	100.256	33.3486	52.5474	2.78161	9.4402	0.0894326	0.0199807	33.3067	57.0569	16.4347	35.6574	1.67374	6.73725	0.0257177	0.00709445	53.1227
INGWIZABUKUNGUUL26				17.0636	1.37405	-23.6375	65.2946	79.1118	20.7651	38.4532	2.17383	8.42588	0.0440895	0.00978708	100.582	100.49	28.1203	45.6561	2.63871	9.05429	0.0693299	0.0129303	27.6956	55.6473	14.4472	31.887	1.66042	7.12977	0.0225614	0.00605939	51.4492
KIHOGORED				-14.6682	-12.2044	-25.3095	71.4854	81.207	26.3741	46.4784	2.24644	8.46321	0.0598978	0.0144384	100.198	100.138	33.5663	53.1838	2.76489	9.57815	0.0833674	0.0189464	43.1114	62.4339	17.7607	38.5401	1.67634	7.01703	0.0310852	0.00993332	60.008
BKN-SUPA				-10.8752	-13.7313	-26.033	64.8519	77.0267	22.4048	40.8398	2.16989	7.11036	0.0480788	0.0119922	99.978	99.9971	28.777	47.1636	2.66379	8.60867	0.0709242	0.015483	32.9216	57.9719	14.6772	33.2385	1.66176	5.99409	0.0243334	0.00796629	57.3981
ANGOLASTAR				10.4003	-28.2059	-26.103	60.1376	73.5517	24.1196	43.8299	2.23664	8.5455	0.0591746	0.0126617	100.155	99.9919	34.0276	51.4611	2.7896	9.85573	0.0885538	0.0181054	17.1529	42.7365	13.9777	35.0993	1.67483	6.825	0.025747	0.00826122	47.8639
IR16T1348				-40.8517	-22.6642	-26.2627	30.4068	41.0733	13.1043	26.0783	2.02438	6.20856	0.0218741	0.00676612	66.8165	68.0284	18.7088	29.1942	2.50006	7.97651	0.0361637	0.00854923	-4.94999	9.77456	12.8435	25.9288	1.65174	5.57466	0.0151523	0.00462832	18.1674
BASMATI217				1.39783	-26.9333	-29.7864	51.8649	65.7716	18.3996	34.9132	2.06423	7.11696	0.032722	0.00811767	100.293	100.258	25.3002	39.8608	2.56646	8.90931	0.0502355	0.0109778	-0.536338	23.7915	13.0012	29.9243	1.66042	6.28792	0.0190849	0.00486264	29.9466
BR153				7.47915	-22.8315	-30.0435	60.3266	74.9241	20.9905	34.0086	2.15444	6.93052	0.038977	0.00933708	100.611	100.416	26.9321	36.498	2.64396	7.9932	0.060333	0.01362	16.1841	45.4995	14.4467	31.2249	1.65	5.5977	0.0210652	0.00517827	43.0193
IR117831-11-1RGA-1RGA-1RGA-1				-215.803	-17.9276	-31.4765	44.2251	62.1663	18.7962	30.3232	2.06339	6.10052	0.0318528	0.00712183	87.4128	90.266	23.9296	36.2526	2.55952	7.9964	0.0551768	0.0119555	-2.04689	28.4241	13.4415	24.1959	1.6523	5.44691	0.0156989	0.00296987	33.8225
KIALANGAWA				-6.53631	-18.3786	-33.7681	58.8417	71.7578	21.2804	39.2823	2.16169	7.8474	0.0427258	0.00869749	100.748	100.565	29.311	48.2388	2.69879	9.13457	0.0659021	0.0129215	10.9975	32.5593	15.4731	30.4432	1.66948	6.67666	0.0210193	0.00502731	35.9553
BASMATI370				-0.639424	-29.8036	-34.3054	52.1379	66.0485	18.5908	34.5048	2.06756	7.16084	0.032022	0.00828233	99.9764	99.9485	25.457	39.7074	2.56719	8.91004	0.0509693	0.0123189	0.302782	25.483	13.0925	30.0884	1.66044	6.30776	0.0184164	0.00445644	32.4908
KANIKI				7.44608	-29.703	-35.1334	74.1889	85.5473	27.3383	45.1258	2.22978	8.46874	0.0525314	0.0107353	100.379	100.211	33.6526	50.1369	2.71235	9.28897	0.0780326	0.0159083	47.8312	74.672	19.1426	39.5884	1.67377	6.97517	0.027219	0.00638611	68.8981
HUA565				-6.57938	-16.0489	-37.366	56.0877	71.8566	17.4246	32.6894	2.1501	7.46316	0.0383103	0.0108507	100.24	100.107	22.0225	36.4582	2.65079	8.40972	0.0548708	0.0137697	12.1	45.9209	13.3631	28.4119	1.654	5.99826	0.0216007	0.00710043	48.2188
IRRI77713-VYUNINZARA-				-3.14524	-12.431	-38.7564	59.2596	74.3921	20.5882	33.982	2.2615	7.7363	0.0476992	0.0110191	100.169	100.05	26.708	38.1212	2.77985	8.87599	0.070249	0.0135209	16.8659	48.6597	14.6406	30.3925	1.66711	6.52306	0.0248636	0.00769604	52.9681
BW196				-7.68184	-25.3377	-39.4164	57.0072	70.2568	19.2726	38.4399	2.16893	7.35885	0.0420934	0.00913049	99.9578	99.8441	24.9432	45.9546	2.69028	8.88616	0.0646877	0.0129271	8.63451	34.4502	14.6594	30.1269	1.66471	6.15702	0.021052	0.00553506	38.7262
KUNGAHARA-BUG2011A-				-11.8435	-30.1957	-39.7403	56.17	75.1924	20.0726	32.9692	2.08525	6.99081	0.0330279	0.00749876	100.221	100.2	26.4941	38.3119	2.62137	8.41285	0.0518021	0.0102455	11.4713	48.8221	13.7239	27.4885	1.65725	6.11228	0.0167656	0.00439516	51.8999
WAYA				5.76791	-32.6239	-40.3971	58.0485	71.2256	19.0913	40.1945	2.16851	7.70457	0.0438844	0.00977434	100.083	99.9335	27.389	47.4527	2.67171	9.03068	0.0676022	0.0127296	4.59762	26.1238	15.6709	33.5572	1.66754	6.52147	0.0243931	0.00640391	26.2282
INTSINDAGIRABIGEGA				-1.78229	-25.6426	-41.9699	53.5409	69.6238	20.063	34.7839	2.22178	7.48155	0.0469573	0.0109052	100.291	100.262	27.3741	41.8071	2.7503	8.67853	0.0769178	0.0153314	2.72755	35.3291	13.1288	27.8369	1.66016	6.05886	0.0205802	0.0066615	39.1317
ITA310				-13.006	-25.9747	-44.3982	64.659	80.7747	19.633	34.7139	2.16661	7.08581	0.0375913	0.00926103	100.421	100.337	25.3922	37.9246	2.66894	8.31324	0.0549313	0.0107131	27.5791	61.3277	15.6687	32.0493	1.65753	6.02335	0.0224064	0.00634557	59.0771
MZINGA				-256.165	-31.6986	-45.1453	58.7262	76.123	18.6555	36.5803	2.06942	7.587	0.0330173	0.00826257	95.403	98.5132	24.617	40.0154	2.54739	8.88851	0.0494136	0.00980462	18.3874	51.0584	14.0212	32.9204	1.6585	6.77716	0.0198967	0.00537123	48.4488
IR14D121				-6.23532	-15.618	-45.4153	39.7968	53.3557	19.2263	34.8587	2.14348	6.56452	0.0399898	0.00849259	66.8275	67.5528	25.4123	42.2037	2.6435	7.9971	0.067595	0.0144391	16.3794	52.3118	13.3789	28.0724	1.65067	5.43236	0.0183889	0.00379514	52.6981
NZAHARA				5.6552	-39.7338	-53.1913	54.2222	73.8685	19.0025	32.5954	2.14829	7.27845	0.0383776	0.00996078	100.184	100.022	24.2938	37.9246	2.65836	8.40548	0.0602914	0.0131232	5.71615	45.7943	13.9806	27.7047	1.65728	6.08106	0.0190445	0.00627376	46.6173
YUNYIN				-189.844	-25.9496	-66.8604	27.0708	39.4524	16.5459	33.3145	2.13516	7.48077	0.035034	0.00764223	60.9435	63.8968	21.2768	38.5539	2.62668	8.86909	0.0536798	0.0110247	-4.83271	10.5989	15.9424	31.6109	1.6586	6.52407	0.0228242	0.00569669	14.4197
CIHERANGSUB1				1.99077	0.442972	18.4911	62.3743	73.4482	17.3994	30.2596	2.15379	6.74462	0.0370673	0.007949	100.475	100.346	23.377	36.5991	2.68275	8.25584	0.0611101	0.0121961	19.5243	42.5243	14.7327	25.8671	1.65394	5.66108	0.0174578	0.004082	35.7084
CIHERANGSUB1AG1				45.5077	-11.8247	14.4634	52.9063	67.8356	16.355	29.4976	2.03132	5.84241	0.0309488	0.00744935	99.17	98.9254	22.2931	34.6057	2.49206	7.78426	0.0506928	0.0102857	3.28355	35.3188	12.5361	24.1701	1.64924	5.08786	0.0167329	0.00401625	43.723
CIHERANGSUB1AG1AG2				10.0106	42.8062	54.4753	69.6859	77.8592	19.7387	33.6259	2.16313	6.95346	0.0460626	0.0102123	99.6833	99.5892	25.6818	38.4473	2.67535	8.28878	0.0672811	0.0134502	47.7728	64.9727	14.9968	28.6164	1.65448	5.73438	0.0239281	0.00646879	78.8889
FR13A				21.8601	11.8491	10.027	50.8056	62.8396	19.1875	34.6623	2.15249	7.2186	0.0442475	0.00782669	100.386	100.29	27.3477	41.737	2.65868	8.90182	0.0685851	0.0114856	-3.23511	12.0546	12.9224	27.8348	1.66272	6.17236	0.0219998	0.00426028	17.6033
IR64				-4.19662	-26.8358	-28.8592	55.4038	70.1961	19.6064	32.8219	2.12637	6.78987	0.0376281	0.010058	100.036	99.9888	26.2087	37.6582	2.65596	8.18524	0.0603324	0.0124625	13.0208	42.2571	12.3918	27.863	1.65211	5.54066	0.0177181	0.00666511	48.4275
KHAOHLANON				-20.1673	-25.9806	-55.3731	63.7134	74.9735	26.228	44.1735	2.10824	6.52057	0.0381433	0.00699884	99.8934	99.7622	35.0715	53.4503	2.62648	8.15999	0.0610194	0.0102605	25.4622	46.4375	14.896	32.9619	1.65245	5.53436	0.0183487	0.0036319	42.161
MAZHANRED				-5.40575	-15.6529	-26.7997	68.148	79.9887	24.6762	42.8995	2.18858	7.38606	0.0475788	0.00871415	100.356	100.267	31.6726	50.5139	2.69119	8.82309	0.0716286	0.0124273	34.4063	58.1292	17.2507	35.2509	1.66724	6.40476	0.024484	0.00506447	55.1132
SWARNASUB1				27.5432	-1.02929	23.9727	53.9937	67.2039	16.86	28.2757	2.02162	6.93883	0.0273487	0.00591786	99.7179	99.5413	21.8792	34.5165	2.54364	8.76562	0.0457893	0.00888696	3.88053	24.5874	14.3611	22.9897	1.65928	6.18699	0.0146115	0.0028973	29.0463
