# Supplementary material for: Screening of potential donors for anaerobic stress tolerance during germination in rice
Source: Front Plant Sci. 2023 Nov 10;14:1261101. doi: 10.3389/fpls.2023.1261101 (PMC10667690; doi:10.3389/fpls.2023.1261101)
Supplement: Supplementary Table 3 — Genomic Estimated Breeding Values (GEBVs) and Selection Indices of 208 Rice Genotypes for Anaerobic Stress Tolerance Donor Identification. Additional information on selection for aerobic and aerobic-anaerobic conditions is provided. Note: DAS - Days After Seeding and BLUPs is for Best Linear Unbiased Predictions. [file Table_3.xlsx]

## Sheet: Sheet1
Genotype ID	Name of genotype	Designation	Source of seeds
GSOR 311783	AFAA MWANZA	Line	IRRI,Dakawa-Tanzania
IRGC 117267	FR13A	Landrace	IRRI, Philippines
IRGC 117436	Basmati 217	Improved	IRRI,Dakawa-Tanzania
IRGC 120750	BR 153	Improved	IRRI,Dakawa-Tanzania
IRGC 121979	Basmati 370	Improved	IRRI,Dakawa-Tanzania
IRGC 124379	BG 90-2	Improved	IRRI,Dakawa-Tanzania
IRGC 136001	NERICA 2	Improved	IRRI,Dakawa-Tanzania
IRGC 138008	Faya (Chikuyu manyoni)	Landrace	IRRI,Dakawa-Tanzania
IRGC 138016	Hodihodi	Landrace	Farmer-Kilombero, Tanzania
IRGC 138024	Kalamata	Landrace	IRRI,Dakawa-Tanzania
IRGC 138049	Kaniki	Landrace	IRRI,Dakawa-Tanzania
IRGC 138056	Kia la ngawa	Landrace	IRRI,Dakawa-Tanzania
IRGC 138066	Kihogo	Landrace	IRRI,Dakawa-Tanzania
IRGC 138074	Kilombero	Landrace	IRRI,Dakawa-Tanzania
IRGC 138079	Kisegese	Landrace	IRRI,Dakawa-Tanzania
IRGC 138103	Nawa tule na Bwana	Landrace	IRRI,Dakawa-Tanzania
IRGC 138110	Mbawa ya njiwa	Landrace	IRRI,Dakawa-Tanzania
IRGC 138117	Masantula	Landrace	IRRI,Dakawa-Tanzania
IRGC 138140	Mdomo wa fisi	Landrace	Farmer-Momba, Tanzania
IRGC 138142	Mkia wa nyumbu	Landrace	IRRI,Dakawa-Tanzania
IRGC 138165	MWANZA	Landrace	IRRI,Dakawa-Tanzania
IRGC 138194	Nondo	Landrace	IRRI,Dakawa-Tanzania
IRGC 138211	Rangi mbili	Landrace	IRRI,Dakawa-Tanzania
IRGC 138221	Shingo ya mwali	Landrace	IRRI,Dakawa-Tanzania
IRGC 138222	Sifara	Landrace	IRRI,Dakawa-Tanzania
IRGC 138231	Simzito	Landrace	IRRI,Dakawa-Tanzania
IRGC 138234	Supa	Landrace	IRRI,Dakawa-Tanzania
IRGC 138268	Supa India	Landrace	IRRI,Dakawa-Tanzania
IRGC 138272	SUPA KIJIVU	Landrace	IRRI,Dakawa-Tanzania
IRGC 138338	Themanini	Landrace	IRRI,Dakawa-Tanzania
IRGC 138340	Tunduru	Line	IRRI,Dakawa-Tanzania
IRGC 138348	Usiniguse	Landrace	IRRI,Dakawa-Tanzania
IRGC 138352	Wahiwahi	Landrace	IRRI,Dakawa-Tanzania
IRGC 138360	Zambia	Landrace	IRRI,Dakawa-Tanzania
IRGC 138425	K 5	Line	IRRI,Dakawa-Tanzania
IRGC 138506	Domo la fisi	Landrace	IRRI,Dakawa-Tanzania
IRGC 138534	Mbawambili	Landrace	IRRI,Dakawa-Tanzania
IRGC 138542	Serena	Landrace	Farmer-Momba, Tanzania
IRGC 138630	Kijicho	Landrace	IRRI,Dakawa-Tanzania
IRGC 138649	Mwarabu	Landrace	IRRI,Dakawa-Tanzania
IRGC 56191	Gamti	Landrace	IRRI,Dakawa-Tanzania
IRGC 56192	Ringa	Landrace	IRRI,Dakawa-Tanzania
IRGC 56193	Supa kijicho	Landrace	IRRI,Dakawa-Tanzania
IRGC 60184	Ma Zhan Red	Landrace	IRRI, Philippines
IRGC 6483	Afaa mwanza 1/159	Line	IRRI,Dakawa-Tanzania
IRGC 66970	IR64	Improved	IRRI, Philippines
IRGC 69697	Kihogo red	Line	IRRI,Dakawa-Tanzania
IRGC 69738	Basmati	Landrace	IRRI,Dakawa-Tanzania
IRGC 69738	Moshi	Landrace	IRRI,Dakawa-Tanzania
IRGC 70678	Mbuyu	Landrace	IRRI,Dakawa-Tanzania
IRGC 75287	Moshi wa sigara	Landrace	IRRI,Dakawa-Tanzania
IRGC 88335	Khao Hlan On	Landrace	IRRI, Philippines
WAB0004533	BW 196	Improved	IRRI,Dakawa-Tanzania
WAB0004569	ITA 304	improved	IRRI,Dakawa-Tanzania
WAB0004876	WITA 9	Improved	IRRI,Dakawa-Tanzania
WAB0006902	Ediget (wab 189-b-b-b hb)	Line	IRRI,Dakawa-Tanzania
WAB0007739	NERICA 1	Improved	IRRI,Dakawa-Tanzania
WAB0013371	FRX 472	Line	IRRI,Dakawa-Tanzania
WAB0015562	FAC 56	Line	IRRI,Dakawa-Tanzania
WAB0015587	FRX 78-12	Line	IRRI,Dakawa-Tanzania
WAB0015592	FRX 92-14	Line	IRRI,Dakawa-Tanzania
WAB0018095	NERICA 7	Improved	IRRI,Dakawa-Tanzania
WAB0018102	NERICA 4	Improved	IRRI,Dakawa-Tanzania
WAB0019619	NERICA 10	Improved	IRRI,Dakawa-Tanzania
WAB0039062	V 18	Landrace	IRRI,Dakawa-Tanzania
None	Afaa kikangaga	Landrace	IRRI,Dakawa-Tanzania
None	Afaa melela	Landrace	IRRI,Dakawa-Tanzania
None	Angola star	Landrace	IRRI,Dakawa-Tanzania
None	Baramata	Landrace	IRRI,Dakawa-Tanzania
None	BKN/SUPA	Line	IRRI,Dakawa-Tanzania
None	BR	Line	IRRI,Dakawa-Tanzania
None	Chambena	Landrace	IRRI,Dakawa-Tanzania
None	Chamota	Landrace	IRRI,Dakawa-Tanzania
None	Cherehani	Landrace	IRRI,Dakawa-Tanzania
None	Chimdima	Landrace	IRRI,Dakawa-Tanzania
None	Chupa	Landrace	IRRI,Dakawa-Tanzania
None	Ciherang Sub1	Improved	IRRI, Philippines
None	Ciherang Sub1 AGI	Improved	IRRI, Philippines
None	Ciherang Sub1 AGI AG2	Improved	IRRI, Philippines
None	Cyicaro	Line	IRRI,Dakawa-Tanzania
None	Dhahabu	Landrace	IRRI,Dakawa-Tanzania
None	Duorado precose	Line	IRRI,Dakawa-Tanzania
None	Farcago 906	Line	IRRI,Dakawa-Tanzania
None	Fashingabo	Line	IRRI,Dakawa-Tanzania
None	FASHINGABO(Bug2013A)	Line	IRRI,Dakawa-Tanzania
None	FAYA 14M69	Improved	IRRI,Dakawa-Tanzania
None	FAYA DUME 1	Landrace	IRRI,Dakawa-Tanzania
None	FAYA DUME 2	Landrace	IRRI,Dakawa-Tanzania
None	FAYA DUME 3	Landrace	IRRI,Dakawa-Tanzania
None	FAYA DUME 4	Landrace	IRRI,Dakawa-Tanzania
None	FAYA DUME 5	Landrace	IRRI,Dakawa-Tanzania
None	Faya karonga	Landrace	IRRI,Dakawa-Tanzania
None	Faya mafuta	Landrace	IRRI,Dakawa-Tanzania
None	Gakire	Line	IRRI,Dakawa-Tanzania
None	Gigante	Line	IRRI,Dakawa-Tanzania
None	Gombe	Landrace	IRRI,Dakawa-Tanzania
None	HUA 565	Line	IRRI,Dakawa-Tanzania
None	IB 126 (BUG 2013A)	Line	IRRI,Dakawa-Tanzania
None	INGWIZABUKUNGU UL 26	Line	IRRI,Dakawa-Tanzania
None	INTSINDAGIRA BIGEGA	Line	IRRI,Dakawa-Tanzania
None	Intsinzi	Line	IRRI,Dakawa-Tanzania
None	IR 117831-11-1 RGA-1 RGA-1 RGA-1	Line	IRRI, Burundi
None	IR 117834-12-1 RGA-1 RGA-1 RGA-2	Line	IRRI, Burundi
None	IR 117842-11-1 RGA-1 RGA-1 RGA-2	Line	IRRI, Burundi
None	IR 121183-5-2-1-1-B	Line	IRRI, Burundi
None	IR 127793-849-1-1-1-3	Line	IRRI, Burundi
None	IR 127795-1121-1-1-2-1	Line	IRRI, Burundi
None	IR 13240-108-2-2-3	Line	IRRI,Dakawa-Tanzania
None	IR 16T1067	Line	IRRI, Burundi
None	IR 16T1339	Line	IRRI, Burundi
None	IR 16T1348	Line	IRRI, Burundi
None	IR 18T1015	Line	IRRI, Burundi
None	IR 2793-80-1	Line	IRRI,Dakawa-Tanzania
None	IR 77713 (VYUNINZARA)	Improved	IRRI,Dakawa-Tanzania
None	IR 79511 (GWIZUMWIMBU)	Improved	IRRI,Dakawa-Tanzania
None	IR14D121	Line	IRRI, Burundi
None	IR15T1302	Line	IRRI, Burundi
None	Iron	Line	IRRI,Dakawa-Tanzania
None	IRRI 213	Line	IRRI,Dakawa-Tanzania
None	IRRI 214 (TAI)	Improved	IRRI,Dakawa-Tanzania
None	ITA 310	improved	IRRI,Dakawa-Tanzania
None	Itumbula 2	Landrace	Farmer-Tanzania
None	Jambo twende	Landrace	IRRI,Dakawa-Tanzania
None	JARIBU	Improved	IRRI,Dakawa-Tanzania
None	Jaribu 220	Improved	IRRI,Dakawa-Tanzania
None	JYAMBERE (Bug2013A)	Line	IRRI,Dakawa-Tanzania
None	Kachambo	Landrace	IRRI,Dakawa-Tanzania
None	Kachikope	Landrace	IRRI,Dakawa-Tanzania
None	Kagiha	Landrace	IRRI,Dakawa-Tanzania
None	Kalalu	Improved	IRRI,Dakawa-Tanzania
None	Kaling'anaula	Landrace	IRRI,Dakawa-Tanzania
None	Kalivumbula	Landrace	IRRI,Dakawa-Tanzania
None	Kalundi	Landrace	IRRI,Dakawa-Tanzania
None	Kanamalia	Landrace	IRRI,Dakawa-Tanzania
None	Katumahi	Landrace	IRRI,Dakawa-Tanzania
None	KIGEGA	Line	IRRI,Dakawa-Tanzania
None	Kihogo Red Morogoro	Line	IRRI,Dakawa-Tanzania
None	Kivuli	Landrace	IRRI,Dakawa-Tanzania
None	Komboka	Improved	IRRI,Dakawa-Tanzania
None	Kubwa jinga	Landrace	Farmer-Tanzania
None	KUNGAHARA (Bug 2011A)	Line	IRRI,Dakawa-Tanzania
None	Kyela	Landrace	Farmer-Momba, Tanzania
None	Lifumba	Landrace	IRRI,Dakawa-Tanzania
None	Lifuwu	Landrace	IRRI,Dakawa-Tanzania
None	Limota	Landrace	IRRI,Dakawa-Tanzania
None	LINE 11 WARDA	Line	IRRI,Dakawa-Tanzania
None	LINE 16	Line	IRRI,Dakawa-Tanzania
None	LINE-18-NIWUR 1	Line	IRRI,Dakawa-Tanzania
None	LINE-8A-2	Line	IRRI,Dakawa-Tanzania
None	Lingwelingweli	Landrace	IRRI,Dakawa-Tanzania
None	Loya	Line	IRRI,Dakawa-Tanzania
None	Lunyuki	Landrace	IRRI,Dakawa-Tanzania
None	Mabula	Landrace	IRRI,Dakawa-Tanzania
None	Magereza	Landrace	Farmer-Momba, Tanzania
None	Magongo ya Wayungu	Landrace	IRRI,Dakawa-Tanzania
None	Maua mekundu	Landrace	IRRI,Dakawa-Tanzania
None	Mbawa mbili mwekundu	Landrace	IRRI,Dakawa-Tanzania
None	Mbawambili kyela	Landrace	IRRI,Dakawa-Tanzania
None	Mbawambili nyeupe	Landrace	IRRI,Dakawa-Tanzania
None	Mbawambili rangimbili	Landrace	IRRI,Dakawa-Tanzania
None	Mbega	Landrace	IRRI,Dakawa-Tanzania
None	Mleke alongole	Landrace	IRRI,Dakawa-Tanzania
None	Mpaka wa bibi	Landrace	IRRI,Dakawa-Tanzania
None	Mpembuke	Landrace	IRRI,Dakawa-Tanzania
None	Msonga	Landrace	IRRI,Dakawa-Tanzania
None	Mwana matongo 2	Landrace	IRRI,Dakawa-Tanzania
None	Mwangaza	Improved	IRRI,Dakawa-Tanzania
None	Mwasungo	Landrace	IRRI,Dakawa-Tanzania
None	Mzinga	Landrace	IRRI,Dakawa-Tanzania
None	Mzungu	Landrace	IRRI,Dakawa-Tanzania
None	Ndamirabahinzi	Line	IRRI,Dakawa-Tanzania
None	Nemeyubutaka	Line	IRRI,Dakawa-Tanzania
None	Niwahi	Landrace	IRRI,Dakawa-Tanzania
None	Nzahara	Line	IRRI,Dakawa-Tanzania
None	Pishori(brown)	Line	IRRI,Dakawa-Tanzania
None	Rangimbili nyekundu	Landrace	IRRI,Dakawa-Tanzania
None	ROJOMENA 271/10	Improved	IRRI,Dakawa-Tanzania
None	RUMBUKA	Line	IRRI,Dakawa-Tanzania
None	RUMBUKA bug 2013A	Line	IRRI,Dakawa-Tanzania
None	Salinas 27	Line	IRRI-Burundi
None	SATO 1	Improved	IRRI,Dakawa-Tanzania
None	SATO 9	Improved	IRRI,Dakawa-Tanzania
None	Sindano kubwa	Landrace	IRRI,Dakawa-Tanzania
None	Sindano nyeupe	Landrace	IRRI,Dakawa-Tanzania
None	Sotea	Line	IRRI,Dakawa-Tanzania
None	Sukari	Landrace	IRRI,Dakawa-Tanzania
None	Sumbawanga	Line	IRRI,Dakawa-Tanzania
None	SUPA BC IMPROVED	Improved	IRRI,Dakawa-Tanzania
None	Supa Katrin	Landrace	IRRI,Dakawa-Tanzania
None	Supa ukerewe	Landrace	IRRI,Dakawa-Tanzania
None	Swarna Sub1	Improved	IRRI, Philippines
None	Tarabinzona	Line	IRRI,Dakawa-Tanzania
None	TEMERIN -381	Improved	IRRI,Dakawa-Tanzania
None	TERIMBERE (LL29)	Landrace	IRRI,Dakawa-Tanzania
None	Tondogoso	Landrace	IRRI,Dakawa-Tanzania
None	Tosa	Landrace	IRRI,Dakawa-Tanzania
None	Tunduru Dihimba	Landrace	IRRI,Dakawa-Tanzania
None	TXD 306(SARO5) IMRPOVED	Improved	IRRI,Dakawa-Tanzania
None	TXD 307	Improved	IRRI,Dakawa-Tanzania
None	TXD 85 IMPROVED	Improved	IRRI,Dakawa-Tanzania
None	TXD 88 IMPROVED	Improved	IRRI,Dakawa-Tanzania
None	Umanho	Line	IRRI,Dakawa-Tanzania
None	UROO 1 IMPROVED	Improved	IRRI,Dakawa-Tanzania
None	WABS 450	Improved	IRRI,Dakawa-Tanzania
None	WAT 317-WAS-B-55-11-3-5-1	Improved	IRRI,Dakawa-Tanzania
None	Waya	Landrace	IRRI,Dakawa-Tanzania
None	Yunyin	Line	IRRI,Dakawa-Tanzania
None	ZX 117 (TARI RICE 2)	Improved	IRRI,Dakawa-Tanzania
