# Supplementary material for: Screening of potential donors for anaerobic stress tolerance during germination in rice
Source: Front Plant Sci. 2023 Nov 10;14:1261101. doi: 10.3389/fpls.2023.1261101 (PMC10667690; doi:10.3389/fpls.2023.1261101)
Supplement: Supplementary Table 4 — Phenotypic Performance of 208 Rice Genotypes for Various Traits Tested for Anaerobic Stress Tolerance During Germination compared to control (aerobic) condition. [file Table_4.xlsx]

## Sheet: Selections
Name of Genotype	BLUPs for the Traits under Anaerobic-Experiment-1								BLUPs for Traits under Anaerobic-Experiemnt-2								BLUPs for traits under Aerobic (Control) condition for Experiment-1								BLUPs for Traits under Aerobic (Control) condtion for Experiment-2								GEBVs (Across Arobic-Anaerobic Conditions)								BLUPS (Across Aerobic- Anaerobic conditions)								BLUPS Across Aerobic conditions
	Germination (14DAS)	Germination (21DAS)	Seedling Height (14DAS)	Seedling Height (21DAS)	Culm Diameter (mm)	Root Length (cm)	Shoot Dry matter (g)	Root Dry matter (g)	Germination (14DAS)	Germination (21DAS)	Seedling Height (14DAS)	Seedling Height (21DAS)	Culm Diameter (mm)	Root Length (cm)	Shoot Dry matter (g)	Root Dry matter (g)	Germination (14DAS)	Germination (21DAS)	Seedling Height (14DAS)	Seedling Height (21DAS)	Culm Diameter (mm)	Root Length (cm)	Shoot Dry matter (g)	Root Dry matter (g)	Germination (14DAS)	Germination (21DAS)	Seedling Height (14DAS)	Seedling Height (21DAS)	Culm Diameter (mm)	Root Length (cm)	Shoot Dry matter (g)	Root Dry matter (g)	Germination (14DAS)	Germination (21DAS)	Seedling Height (14DAS)	Seedling Height (21DAS)	Culm Diameter (mm)	Root Length (cm)	Shoot Dry matter (g)	Root Dry matter (g)	Germination (14DAS)	Germination (21DAS)	Seedling Height (14DAS)	Seedling Height (21DAS)	Culm Diameter (mm)	Root Length (cm)	Shoot Dry matter (g)	Root Dry matter (g)	Germination (14DAS)
MWANGAZA	55.4019	75.4833	13.7018	33.0017	1.47164	8.66606	0.026732	0.008387	58.0943	78.1112	17.647	38.8012	2.08224	11.8833	0.037573	0.007799	98.6656	98.6656	25.8967	33.1761	2.01276	7.61503	0.0446242	0.011163	91.0461	90.7186	33.4826	50.8852	3.26054	8.8072	0.104586	0.014182	69.4381	78.7836	22.6133	38.1374	2.13958	8.24964	0.0477676	0.011477	69.7225	78.7644	22.4378	38.3958	2.20188	8.48013	0.0512305	0.0116617	95.6376
AFAAMWANZA1-159	51.9849	70.7554	15.023	33.0683	1.45879	5.68317	0.024547	0.00449	87.6612	93.7424	23.1112	45.089	1.99826	9.70308	0.049364	0.007897	100.141	100.141	25.9644	42.1306	2.09258	7.82119	0.059258	0.012661	99.8793	100.185	33.7539	54.4039	3.69618	8.48623	0.107267	0.01426	79.8019	86.6681	23.7876	43.4539	2.23171	8.06144	0.058415	0.00981747	76.1438	83.6232	23.4837	42.9797	2.22184	7.81532	0.0560315	0.00971863	99.8872
KANAMALIA	76.8622	93.6909	21.8445	37.995	1.50864	5.74656	0.034308	0.00813	57.9898	65.9263	26.0763	47.0722	2.40865	11.3833	0.054906	0.010982	100.324	100.324	28.8127	43.3796	2.04527	7.2812	0.0590396	0.012437	100.385	100.345	37.955	57.5563	3.65307	8.15655	0.106173	0.018033	78.2018	85.6387	27.5758	46.1377	2.21504	7.98862	0.0625866	0.0124502	75.4082	82.212	27.0709	45.5094	2.23693	7.87076	0.0603308	0.012391	100.182
ROJOMENA271-10	63.1937	87.2807	19.9756	36.0712	1.36415	6.896	0.030419	0.006488	70.3786	74.8755	24.3927	48.7505	2.39641	10.7691	0.055482	0.012481	100.378	100.378	32.9516	44.0274	2.0623	8.27708	0.0570766	0.009836	100.107	100.207	37.5994	57.2597	3.38506	9.84617	0.098278	0.01384	77.838	83.7652	28.7157	45.9812	2.20186	8.26417	0.0590426	0.0109989	75.163	82.6818	28.0702	45.4639	2.19638	8.25406	0.0578053	0.0109991	100.1
TARABINZONA	82.0557	96.8482	17.0873	36.0236	1.48253	5.90437	0.021902	0.005699	86.5945	81.7073	24.3118	42.6465	2.31329	11.283	0.041901	0.011042	100.217	100.217	27.9318	45.2475	1.94473	8.36401	0.0549793	0.010464	99.9787	99.945	30.3556	53.0825	3.99274	9.39169	0.089486	0.01252	82.768	87.3992	24.6014	44.6452	2.20959	8.04727	0.0522513	0.0104117	79.7205	84.0834	24.2562	44.0042	2.20687	8.09673	0.0516419	0.0103514	99.9635
MAGONGOYAWAYUNGU	41.4776	65.4229	16.0183	34.1766	1.40655	5.70109	0.024858	0.006621	38.313	50.1356	17.2099	41.0763	2.03383	9.24658	0.035715	0.006453	100.211	100.211	26.9155	44.7938	2.11235	8.43001	0.0761951	0.013223	100.437	100.611	37.2485	49.9246	3.56856	8.50481	0.095842	0.013355	78.5132	86.9293	29.3735	47.2303	2.28852	8.66446	0.0692592	0.0137761	74.0592	83.1066	28.9069	46.8864	2.26557	8.22629	0.0676483	0.0135885	100.134
MPAKAWABIBI	74.0775	101.67	15.3473	33.3484	1.46907	6.31954	0.025173	0.008054	66.1884	77.5798	22.442	42.5832	2.14909	11.5543	0.04566	0.010288	100.271	100.271	28.2805	40.0392	2.03995	7.98365	0.0497161	0.01556	99.9667	100.13	36.7754	59.3094	3.55942	8.91799	0.115761	0.014116	79.5698	86.6141	25.0563	43.1167	2.21649	8.34246	0.0555716	0.0124305	75.9534	84.0945	24.8811	42.7043	2.2145	8.11434	0.0537677	0.0123349	99.9888
IB126-BUG2013A-	58.9525	86.8688	16.3705	28.0403	1.39433	6.33272	0.02225	0.007968	55.9705	64.8538	20.2216	35.2244	1.89292	7.7338	0.026521	0.004805	100.494	100.494	23.7767	39.9125	2.05211	7.87179	0.0503919	0.011001	99.9456	100.073	24.1934	38.5058	3.18414	8.44115	0.059561	0.011789	75.4806	84.0413	20.9861	36.3502	2.17228	7.50129	0.0445716	0.0108193	72.5628	81.4211	20.9059	36.5326	2.18321	7.77222	0.0465187	0.0108428	100.097
WAHIWAHI	85.9827	105.246	18.6071	37.7161	1.49672	7.63875	0.032247	0.009388	66.8928	89.8531	32.7899	44.3164	2.15574	9.44233	0.047234	0.009859	100.249	100.249	35.5669	46.106	2.07288	10.6577	0.0652224	0.018702	99.7168	99.7862	38.2008	54.9359	4.15251	10.1661	0.127727	0.021516	81.8744	89.0628	30.4631	46.3233	2.28939	8.97892	0.0661541	0.0142462	77.768	85.9274	30.0513	45.341	2.2392	8.55802	0.061769	0.0140094	99.8764
KUBWAJINGA	44.4175	76.7296	13.6926	29.1711	1.47748	3.68998	0.020155	0.004455	67.0379	76.5372	22.1465	39.6874	2.26478	7.71966	0.041815	0.014141	100.09	100.09	25.7883	35.4131	2.11285	8.64358	0.0505276	0.016507	99.944	100.133	30.4455	47.9366	3.89851	9.26217	0.092551	0.014995	75.3701	83.1368	22.3668	37.7153	2.24378	7.09859	0.048975	0.0109746	71.9349	81.8305	22.4511	37.7803	2.24317	7.46995	0.0499766	0.0110249	99.8843
KALING-ANAULA	49.6775	74.3022	12.8688	31.5143	1.44752	6.85319	0.025318	0.009778	55.8696	58.7253	18.0585	39.8508	2.04309	8.97731	0.033208	0.007577	100.273	100.273	29.4026	44.5658	2.11049	8.5533	0.0635572	0.009269	99.9001	100.096	29.2416	43.8474	2.83924	11.3069	0.125066	0.019746	73.0138	82.1724	23.0767	41.0715	2.21732	8.384	0.0584305	0.012683	71.3923	79.7056	23.0331	40.6444	2.21182	8.25892	0.0567152	0.0125875	99.9636
NERICA4	29.1406	61.7648	12.151	28.7938	1.45666	8.1432	0.024096	0.006918	36.1738	49.8236	16.7541	28.9937	1.57954	4.55606	0.010977	0.002239	100.318	100.318	23.0262	31.3551	1.78328	8.29632	0.0350817	0.007131	100.021	100.214	24.8087	40.0761	2.70332	10.982	0.058962	0.01194	68.6839	81.5906	19.822	33.7276	2.12483	8.49839	0.0414937	0.00954286	65.747	77.5744	19.3684	33.3209	2.12056	8.18269	0.0416763	0.00963541	100.035
LUNYUKI	51.8866	77.8316	14.9154	29.6849	1.40482	4.66112	0.016779	0.003228	53.6715	58.3121	19.6351	39.5907	2.13418	8.26898	0.037906	0.007083	100.445	100.445	26.4618	39.6483	2.08399	9.21251	0.0537623	0.010112	100.113	100.348	33.5162	49.9985	3.3657	11.3064	0.090654	0.011309	70.8324	80.7799	22.973	39.6264	2.1491	8.05067	0.0460729	0.00823849	71.3236	80.0004	23.1674	39.5744	2.20407	7.89334	0.0489386	0.0083561	100.136
AFAAMELELA	48.4182	67.7055	16.0314	33.266	1.42076	5.46348	0.02259	0.004888	41.4664	56.1281	17.7377	38.6544	2.0972	9.86345	0.031092	0.009585	100.495	100.495	24.7875	34.9731	1.9264	9.44983	0.0449824	0.011171	99.8364	99.9412	32.8915	48.8915	3.30712	9.91037	0.096116	0.016988	70.3472	80.7875	22.5192	38.5067	2.13354	8.17832	0.0456336	0.0100187	69.1153	78.7746	22.3833	38.6619	2.16893	8.06917	0.0483381	0.0101746	100.054
MBEGA	39.1231	80.0096	10.8519	27.3498	1.34848	5.5933	0.013875	0.004348	32.045	50.3657	13.1469	30.3444	1.61425	5.40068	0.022657	0.003865	100.518	100.518	26.213	39.775	1.98538	9.1514	0.0531141	0.010826	100.109	100.192	30.4951	50.1022	2.8711	10.0839	0.085882	0.012226	67.0125	79.2227	21.5814	38.7654	2.18997	8.21146	0.0503943	0.00881237	66.6323	79.2056	20.9292	37.3213	2.14097	7.7285	0.0454241	0.00873518	100.173
TUNDURU	43.9846	71.7141	13.3776	34.8994	1.48902	7.09752	0.028342	0.009954	17.0303	48.4867	12.2574	43.5104	2.09354	9.13303	0.032797	0.013986	100.378	100.378	31.7862	51.007	2.13293	11.5585	0.0855168	0.01361	100.775	100.594	38.338	48.8823	3.71028	13.0707	0.143172	0.02436	66.8629	78.9354	24.2599	44.0635	2.19795	8.35152	0.0629963	0.0143332	65.348	78.3664	24.8468	45.0438	2.24304	8.74986	0.0650698	0.0144116	100.361
IR16T1339	0	43.2822		14.2055	1.36274	4.83782	0.006813	0.002989	0	31.1578		19.9442	1.37931	4.41975	0.011034	0.001797	100.297	100.297	17.1156	27.7691	1.96026	8.18321	0.025872	0.010564	92.9944	93.1111	23.8507	36.8596	3.09347	7.34112	0.066829	0.015592	50.5822	64.19	12.5194	26.6109	2.06639	6.67007	0.0250188	0.00630859	52.6113	66.1093	13.152	27.4568	2.08506	7.05257	0.0294688	0.00648735	95.4025
LINE-8A-2	3.8421	57.0297	9.9339	21.7659	1.34428	4.65833	0.010339	0.0029	9.77004	36.4615	12.7458	30.2925	1.67155	5.84228	0.016542	0.002488	100.376	100.376	24.9302	29.2318	1.84854	9.08226	0.0343949	0.010539	99.9784	99.9751	25.7646	35.5042	2.79739	10.3228	0.089878	0.016927	57.9703	76.4316	19.205	29.527	2.08989	7.99295	0.0350219	0.00815347	58.6643	75.5614	19.5348	30.0458	2.10952	7.6652	0.0386319	0.00823516	100.048
IR15T1302	4.45305	44.3247	10.9889	24.1315	1.37432	5.43579	0.01354	0.006341	27.6672	49.2131	14.2997	32.5342	1.76652	5.79073	0.019562	0.005801	100.33	100.33	22.9642	30.9178	1.95519	8.10079	0.036809	0.009559	99.8053	99.9587	29.9453	45.6364	3.46569	9.10854	0.08276	0.015779	49.9714	68.4683	14.3935	25.0512	2.09569	6.66541	0.0311427	0.0077832	52.4716	71.7511	15.0288	26.0968	2.1341	7.20991	0.0354328	0.00796012	97.2343
NERICA2	12.7208	64.7072	10.6594	27.5841	1.52168	6.27052	0.015566	0.005254	21.5495	39.2324	17.2856	30.4403	1.6532	10.5152	0.020339	0.00501	100.621	100.621	20.0115	27.1323	1.74871	7.11133	0.0302734	0.006432	100.136	100.254	26.187	44.4987	3.06227	11.0067	0.069625	0.015912	59.9985	77.0904	18.0158	31.9923	2.10038	8.14666	0.035888	0.00902435	61.6433	76.6866	18.2123	32.5094	2.13507	8.08906	0.0384454	0.00912856	100.236
LINE-18-NIWUR1	25.5813	58.2154	12.13	32.1749	1.49433	6.31087	0.02061	0.005946	31.3267	39.8998	14.4902	40.2659	1.96418	10.6986	0.02763	0.008275	100.34	100.34	28.2197	41.702	2.14908	11.1899	0.0645991	0.016398	99.6471	99.7214	34.5048	52.6178	3.25917	8.33174	0.095591	0.011985	65.2904	76.941	22.8657	41.6881	2.22269	8.49271	0.0517685	0.0107251	64.5173	75.9781	22.8174	41.4089	2.23669	8.33604	0.0523927	0.0108452	99.8956
IRON	5.88147	30.5025	17.3963	29.4061	1.37808	3.97408	0.022868	0.004848	7.0003	10.3899	26.147	39.7427	2.39003	9.25229	0.046436	0.016412	100.159	100.159	24.0512	38.335	2.03785	8.21807	0.0419147	0.011746	81.1451	81.3648	27.1981	47.4397	3.52516	9.76401	0.071701	0.013033	48.8066	57.919	21.9536	38.1488	2.14512	7.47768	0.0425857	0.0105451	54.1649	64.913	22.472	38.6998	2.19668	7.63419	0.0477985	0.0107703	92.583
CHIMDIMA	64.287	83.0345	17.4796	35.5572	1.40399	5.07225	0.024054	0.003799	49.8809	60.1141	20.0376	45.6366	1.85689	5.53652	0.032869	0.006161	99.6706	99.6706	33.2577	47.7528	1.92195	8.73382	0.067522	0.013325	101.254	100.956	39.6045	58.7825	3.38818	8.68031	0.094697	0.019462	77.8686	84.1099	27.9664	46.896	2.18211	7.80726	0.0567015	0.00972596	72.5147	80.5389	27.4635	46.1728	2.15637	7.50427	0.0551209	0.00962452	100.182
PISHORI-BROWN-	44.8353	68.4636	20.0998	34.547	1.46411	5.21558	0.027931	0.006729	71.1738	74.4046	24.5488	44.1081	2.16317	9.33928	0.047577	0.009387	100.333	100.333	33.4338	51.3079	2.11231	10.4413	0.0796139	0.013651	99.6208	99.7744	39.0819	60.3408	3.32217	9.98212	0.10888	0.018919	75.8748	83.6628	28.7692	47.7701	2.23732	8.13563	0.0653012	0.0116927	72.5854	80.882	28.5517	47.047	2.22815	8.10012	0.0628414	0.0116348	99.8868
GIGANTE	60.121	96.5123	21.6185	34.7333	1.44569	5.10262	0.02842	0.005385	52.1155	65.1966	20.865	41.6547	2.09186	9.80414	0.043874	0.008505	100.236	100.236	30.5935	44.1986	2.04274	9.66392	0.0609748	0.011179	99.5033	99.5621	37.2466	55.4319	3.42794	11.5962	0.097663	0.012996	75.8934	83.8796	27.5381	44.1211	2.21757	8.17229	0.0578604	0.0100288	72.2164	82.2533	27.0014	43.5813	2.20502	8.16178	0.0565954	0.00999219	99.787
FAYADUME3	66.5988	84.4888	17.4116	36.3124	1.46522	5.90004	0.027626	0.006111	50.1604	67.9429	20.4001	44.3728	1.95722	8.93885	0.037422	0.009095	100.126	100.126	32.2217	43.0719	2.04775	7.74809	0.0595674	0.010496	100.447	100.375	41.0632	58.1245	4.2011	11.4403	0.135377	0.028979	75.7438	84.8243	27.9776	45.3419	2.24739	8.49827	0.0632644	0.0118128	72.8564	81.6493	27.3114	44.5491	2.21851	8.00592	0.0577319	0.0116631	100.101
FAYADUME1	58.6735	82.7903	15.4406	35.1682	1.40382	6.14467	0.026018	0.005263	46.4973	77.0696	23.1159	41.8334	2.33614	9.0951	0.045561	0.011706	100.272	100.272	34.5877	48.3496	2.06936	9.21332	0.0738364	0.016054	100.125	100.292	40.8421	61.3615	3.91908	11.4422	0.130717	0.021492	75.5361	85.4584	28.3162	46.5289	2.2495	8.46432	0.0651461	0.0117848	71.2241	82.5436	28.1868	45.9936	2.21556	8.21796	0.061727	0.0116339	100.051
TOSA	22.1466	70.1145	9.57653	23.9743	1.35173	4.92384	0.010884	0.002882	48.7606	74.2904	12.7165	31.9612	1.57665	8.46257	0.018035	0.004061	100.375	100.375	21.0598	25.4211	1.61491	5.7102	0.0209007	0.003427	99.9019	99.9306	26.2945	40.9467	2.29574	6.14446	0.046879	0.00818	66.1771	80.2003	17.541	30.5181	2.0378	7.58195	0.0291589	0.00656619	66.5089	81.0768	17.8497	30.7282	2.04166	7.18646	0.0321437	0.00668927	100.017
RINGA	67.1069	93.1699	18.0225	31.778	1.45037	4.90331	0.02587	0.006688	38.7441	58.9985	21.0472	46.911	2.23382	9.80079	0.050008	0.017749	100.448	100.448	31.4702	40.9851	2.02276	9.88609	0.0602028	0.014216	99.9815	100.22	37.4245	53.7401	3.88031	9.35046	0.097654	0.012783	79.7119	87.7218	27.0831	43.1574	2.2596	8.60027	0.0601888	0.0124833	71.3423	81.3342	26.6288	42.5085	2.21278	7.97617	0.0562146	0.0122557	100.088
KIVULI	62.9301	75.3893	15.8477	29.3992	1.43366	4.41732	0.020604	0.005917	49.2809	62.2104	19.8886	41.9131	2.28303	10.2788	0.046653	0.015156	100.549	100.549	26.8911	42.5221	2.05328	8.31431	0.0588615	0.012033	99.9599	100.106	36.8582	55.9768	3.51176	8.64585	0.097384	0.013019	76.8338	85.1684	24.4411	42.2591	2.22154	7.897	0.0553799	0.0113456	72.1978	80.1831	24.1131	41.8344	2.21191	7.71031	0.0534074	0.0112466	100.132
MZUNGU	54.361	78.3288	16.7022	33.7177	1.41655	5.81124	0.02575	0.006213	59.2251	63.8852	26.4032	46.3105	2.4481	10.2022	0.047592	0.011486	100.58	100.58	29.5665	44.1324	1.99265	8.20814	0.0579611	0.010857	99.9205	100.258	35.7881	55.7529	3.29413	9.58627	0.089681	0.012771	80.0572	87.8194	26.2174	44.8938	2.23648	8.23971	0.0579586	0.0109365	72.3848	80.6821	26.0039	44.2084	2.19463	7.99854	0.0546673	0.0107637	100.132
HODIHODI	0	27.9594	12.5396	16.0071	1.21869	4.81604	0.006293	0.001333	3.13753	10.953							100.514	100.514	21.1452	31.2092	1.97418	8.53648	0.0500144	0.008705	100.267	100.274	26.3765	43.6148	3.43413	9.76816	0.076899	0.015415	52.4744	66.3477	18.0989	30.0469	2.12762	7.86129	0.0423876	0.00723507	57.0421	70.3267	18.6411	30.3745	2.12054	7.68445	0.041137	0.00713909	100.233
FAYADUME2	46.2547	70.7294	15.6733	33.617	1.44544	4.73524	0.027827	0.006345	51.9917	57.8292	21.02	42.5914	2.0854	7.47634	0.043154	0.012294	100.068	100.068	30.0882	45.9591	2.11345	10.256	0.0734536	0.015527	99.6016	99.9132	38.1376	61.4474	3.99158	11.0034	0.133253	0.022616	70.3431	79.045	25.6254	45.5801	2.22742	8.23315	0.0652948	0.0124417	70.0497	79.0696	25.7056	44.9929	2.2299	7.93435	0.0621295	0.012338	99.7404
CHAMOTA	53.3086	73.3024	20.4654	28.8937	1.46268	5.83806	0.019696	0.004499	61.5524	63.7276	23.5459	41.0388	1.88809	8.75442	0.035173	0.009232	96.4859	96.4859	31.2522	45.6798	1.92741	10.8921	0.0556741	0.009055	99.9564	100.064	33.8316	59.224	3.37068	8.43523	0.105326	0.015331	73.7077	79.5656	26.9367	43.4634	2.18783	8.13969	0.0529831	0.00957518	71.51	79.053	26.7617	43.0565	2.17495	8.09548	0.0512795	0.00950748	98.0395
IR18T1015	0	4.08446		19.8446	1.25438	5.21113	0.006054	0.002423	4.16736	19.4586		21.7271	1.39327	2.84601	0.003992	0.000436	98.1607	98.1607	14.8968	28.8397	1.85033	7.77365	0.0285974	0.007475	91.0201	91.3132	20.9947	31.8857	2.7823	5.55592	0.03972	0.007929	46.437	59.1896	12.153	26.372	2.00958	5.84729	0.0263758	0.00670494	52.0575	65.632	12.5284	27.5851	2.07643	7.16007	0.0336267	0.00713376	91.51
MBUYU	29.3405	62.9798	14.3736	36.6236	1.47306	8.52117	0.033974	0.0084	39.365	52.8347	17.3689	41.8776	2.24418	9.63005	0.038993	0.012747	100.343	100.343	27.9801	44.2083	2.06642	9.0298	0.0672188	0.01273	100.3	100.344	39.4472	52.5571	3.83558	10.7973	0.124315	0.017478	71.4811	83.9191	24.7274	43.7675	2.23609	8.76905	0.0641201	0.0128185	66.2852	78.0689	24.3446	43.3601	2.22833	8.45015	0.0613721	0.0126486	100.158
FAYAKARONGA	37.648	73.3043	14.0709	33.679	1.49169	6.33331	0.02768	0.00694	34.4242	49.5999	18.6539	45.3625	2.14848	9.94254	0.040261	0.011179	100.262	100.262	28.4528	43.5426	2.04976	10.295	0.0678671	0.016177	99.4205	99.4279	33.7358	58.3182	3.30393	11.9725	0.128046	0.028819	71.0212	82.2444	23.3251	43.4727	2.21676	8.38662	0.0616588	0.0131978	66.5343	78.2703	23.715	44.0522	2.21682	8.42943	0.0599004	0.0130607	99.7706
ZX117	25.9921	45.8464	9.03425	22.8069	1.38308	4.73275	0.013742	0.003192	3.53963	24.581	16.306	24.1718	1.12638	3.9982	0.008156	0.0006	100.288	100.288	19.9859	29.1256	1.86732	8.39448	0.0358217	0.009231	100.151	100.136	25.4093	40.2757	3.82355	7.74485	0.067922	0.013936	57.6253	68.5895	17.019	29.5382	2.09664	6.91509	0.0338592	0.0076528	60.9196	73.2809	17.4921	30.3187	2.12684	7.29965	0.0381041	0.00779886	100.07
SHINGOYAMWALI	31.272	64.6717	12.3489	30.0787	1.35992	4.4352	0.020091	0.004376	35.6268	47.0629	16.9916	39.8981	2.09721	9.00588	0.037168	0.009812	100.031	100.031	28.9304	46.6328	2.07738	8.48492	0.0712043	0.015755	101.431	101.07	35.0529	55.3218	3.62275	9.8976	0.102865	0.019113	70.5877	82.1466	23.773	43.3639	2.21279	8.32662	0.0588277	0.010856	66.2089	77.6534	23.5617	42.7734	2.19247	7.73003	0.0556661	0.0106662	100.437
MASANTULA	49.5465	70.4738	14.9476	31.1364	1.46166	5.14906	0.029431	0.00751	31.3469	46.0746	18.1536	41.0162	1.9378	9.26319	0.033801	0.006498	100.181	100.181	30.1747	46.0513	1.91443	9.43653	0.0701281	0.014116	99.5966	99.6922	27.2078	58.4954	3.77942	11.1438	0.124247	0.024565	68.1599	79.8321	24.1044	43.0405	2.23107	8.34107	0.0606291	0.0108852	67.8031	77.9978	23.8791	42.6063	2.2116	7.846	0.0566163	0.010707	100.142
MAUAMEKUNDU	31.4155	61.3152	15.4769	31.0606	1.44241	4.63863	0.018381	0.004246	32.5395	49.6122	19.6543	38.9679	1.81891	6.79189	0.026674	0.004158	100.403	100.403	28.338	44.7212	1.99791	8.54455	0.0591486	0.01058	100.132	100.174	35.7657	56.6451	3.27155	8.00418	0.099306	0.013308	68.2229	78.8447	23.6637	44.0451	2.19776	8.07622	0.0597453	0.0122365	67.7553	77.6596	23.4282	43.6163	2.1779	8.06255	0.0570023	0.0122018	99.7961
MAGEREZA	61.7424	89.7572	19.5948	34.6718	1.48975	5.67889	0.032242	0.007539	63.9281	76.8471	25.0044	47.6467	2.31567	10.9456	0.055382	0.016026	100.452	100.452	34.6849	49.4173	2.13064	8.77434	0.0418772	0.015127	100.094	100.202	38.4411	58.8291	4.72846	11.3171	0.15348	0.024836	68.8761	79.0388	21.1442	32.593	2.21491	7.5236	0.0465359	0.0107083	70.2367	81.3911	21.3073	32.9044	2.23588	7.65011	0.0463077	0.0107094	99.8049
GOMBE	39.1294	60.5288	14.4018	31.2066	1.34921	5.8154	0.019269	0.006106	59.4775	64.9642	24.8904	41.2617	1.99251	8.44111	0.039091	0.006728	100.42	100.42	28.402	43.9808	1.97654	7.98977	0.0580744	0.00911	100.059	100.124	35.4896	56.3748	3.68959	8.41495	0.110614	0.016834	73.0387	82.5568	25.0536	43.0206	2.18534	7.9741	0.0540184	0.0102992	70.3432	79.2392	24.834	42.6912	2.1637	7.75113	0.0526345	0.0102002	100.103
NONDO	54.77	90.1615	20.4717	31.8781	1.44226	4.91169	0.026961	0.006809	63.0988	83.9872	22.0169	44.2597	2.22644	9.75597	0.042864	0.012034	100.291	100.291	26.3845	42.6781	1.97618	7.80944	0.0557057	0.012591	100.45	100.53	30.7819	52.225	3.31705	8.69849	0.081719	0.017822	76.408	85.6395	24.4178	42.8073	2.2076	7.98796	0.0558004	0.0118908	73.0175	84.0117	24.0978	42.3213	2.19081	7.7028	0.0533725	0.0117867	100.188
IR2793-80-1	0	6.46688		23.6871	1.38001	6.08672	0.009844	0.003482	2.21355	3.07369							63.455	63.455	16.3306	25.4902	1.73783	4.4854	0.0402513	0.004115	69.9951	71.9058	20.8703	31.0633	2.80432	6.12986	0.037841	0.010451	64.4899	77.8339	17.4132	29.2348	2.17504	7.0739	0.0405762	0.00972789	67.044	80.6417	17.6505	29.9944	2.19124	7.37136	0.0427977	0.00981056	100.101
SIMZITO	33.499	67.0124	11.4589	28.3224	1.43868	6.93543	0.023668	0.007563	33.1243	55.4048	21.7977	38.0802	1.96405	8.40878	0.039706	0.00919	100.376	100.376	27.5965	40.9775	2.05654	6.76587	0.0541683	0.011151	100.039	100.123	35.1991	51.9891	3.49778	9.44008	0.099452	0.01527	69.3629	80.8893	23.6625	40.2449	2.23618	8.35159	0.0576916	0.0116401	65.96	78.6554	23.471	39.6988	2.2032	7.88238	0.0525297	0.0114585	100.072
FARCAGO906	36.3505	75.2934	14.4248	26.6072	1.47162	5.25272	0.021417	0.006459	59.7345	74.0568	17.8512	36.6774	2.04301	8.06224	0.033919	0.008207	100.33	100.33	23.574	39.9596	1.9288	6.87196	0.0463823	0.009521	99.7785	99.9303	29.2838	44.5898	3.57782	8.27348	0.093986	0.016614	70.9478	80.4974	20.9469	37.2479	2.17723	7.52625	0.0465297	0.010626	69.9135	81.4654	20.9863	37.4656	2.18487	7.49812	0.0484307	0.010624	99.9465
KALAMATA	29.16	65.357	13.8199	32.8869	1.45039	5.49535	0.022796	0.00582	25.943	49.3092	18.6808	42.1225	2.29271	8.70501	0.048368	0.009654	100.593	100.593	29.3523	44.0689	2.03316	10.4862	0.0743272	0.017928	100.853	100.537	37.406	57.2313	4.04181	11.2678	0.139867	0.021365	68.7643	81.3639	25.3201	44.2113	2.23818	8.43834	0.0635089	0.0120422	64.6456	77.9877	24.6319	43.4332	2.21929	8.19789	0.0614246	0.011875	100.504
MBAWAMBILIMWEKUNDU	10.6163	53.4413	13.649	29.354	1.37683	5.44808	0.018022	0.005763	32.6658	48.6276	15.4083	42.0758	2.04008	8.48186	0.042667	0.014097	100.503	100.503	28.1683	44.0922	2.04959	10.2674	0.0648594	0.015973	99.8191	99.8636	39.1751	58.3766	3.59743	12.7238	0.121395	0.025702	72.8811	84.0836	24.0275	44.9097	2.19348	8.0126	0.0561316	0.010085	64.4258	76.3916	23.5805	44.2378	2.17248	7.83614	0.0544236	0.00999131	100.021
FAYAMAFUTA	66.3545	82.6815	14.9149	33.9413	1.50645	4.52113	0.027071	0.007115	45.001	70.6482	24.9106	41.7119	1.82721	10.0884	0.03614	0.008599	100.311	100.311	26.7971	45.5752	2.03609	9.82174	0.0542132	0.012505	100.151	100.144	32.7533	57.241	3.90561	10.0588	0.118925	0.020048	75.315	84.935	23.9903	44.6702	2.20183	7.95133	0.0564871	0.011722	72.2227	81.9778	23.9078	44.1106	2.21764	8.01038	0.0547098	0.0116874	100.082
CHAMBENA	43.5973	70.8647	13.2399	29.7963	1.37391	5.93688	0.018509	0.004794	69.3031	80.6366	23.3598	45.364	2.2485	8.65777	0.047377	0.012539	99.979	99.979	28.4574	46.846	2.02248	8.84503	0.0680277	0.012915	99.7212	99.7595	35.575	56.6104	3.58696	9.60377	0.103291	0.019798	70.9387	82.0868	24.4925	44.557	2.21918	8.35462	0.0592344	0.0110939	72.0894	81.7023	24.4245	43.9988	2.1875	7.96945	0.0554286	0.0109122	99.7392
LINE11WARDA	27.8094	64.9336	10.5175	21.2797	1.19979	4.17489	0.010923	0.003571	58.9634	61.8718	16.2771	37.1489	2.04703	10.3228	0.031784	0.008035	100.479	100.479	22.0889	32.9939	1.98854	11.5571	0.0452721	0.013756	100.675	100.425	35.3738	50.7728	3.10819	10.2867	0.079483	0.015639	67.729	81.1505	19.5656	33.8375	2.11539	8.39807	0.039459	0.00937547	68.854	79.3528	20.4171	35.0401	2.11903	8.14235	0.0428503	0.00947478	100.375
KIHOGO	39.2201	63.8124	14.042	33.3139	1.46065	7.0303	0.033915	0.009755	29.9652	38.8804	12.8348	37.2614	1.82906	7.66961	0.028063	0.006961	100.514	100.514	31.7523	41.5281	2.15435	11.0286	0.0594909	0.014739	99.8473	100.014	40.7726	61.6349	4.02034	14.8747	0.137298	0.023972	68.7216	79.149	25.542	43.0864	2.24686	8.68591	0.0628851	0.0136633	66.3082	76.4649	25.4553	42.5702	2.23642	8.71247	0.0591022	0.0135403	100.069
TEMERIN-381	39.7318	69.2541	14.665	35.7644	1.48312	9.64499	0.034076	0.012384	49.9947	54.4914	24.6891	46.0149	2.4837	11.4341	0.047554	0.015388	99.901	99.901	32.3638	48.7802	2.03345	9.97573	0.0703463	0.018643	99.9665	100.131	36.9774	58.1643	3.73164	9.84385	0.129074	0.016332	71.6079	80.6163	26.9346	47.2662	2.2263	8.8732	0.0667381	0.0159624	68.9473	78.625	26.6391	46.4912	2.23035	8.96052	0.0639776	0.0159082	99.7961
IR13240-108-2-2-3	30.8392	64.3669	14.1691	24.7104	1.40051	4.84182	0.017407	0.007457	45.5927	64.4516	18.7362	28.9601	1.77108	4.53857	0.019299	0.004773	100.427	100.427	21.647	30.4765	1.88459	9.20792	0.0336336	0.010038	99.82	99.956	23.928	36.4287	2.99774	9.18341	0.064866	0.01527	67.9422	78.9678	19.4936	30.5704	2.10964	6.93213	0.0355256	0.010575	67.2572	79.4574	19.3858	31.2122	2.13715	7.47456	0.0395053	0.0106939	100.013
FAC56	45.745	68.019	13.5082	29.3214	1.42463	6.70774	0.024809	0.010509	28.7538	41.8796	17.6749	32.8919	2.00726	7.12243	0.026762	0.010506	100.243	100.243	23.3884	34.9856	2.00243	8.65955	0.0473266	0.00897	101.135	100.812	29.3481	46.6009	3.14198	9.76004	0.094092	0.015271	69.7934	79.3174	20.6516	36.0456	2.17544	7.51425	0.0471731	0.0128754	67.3001	77.3019	20.7214	36.2171	2.18257	7.97563	0.0490569	0.0129399	100.431
ITUMBULA2	33.1456	70.6559	11.8569	30.042	1.27177	3.79098	0.015675	0.00408	53.0553	62.4099	16.5876	40.928	2.03284	9.38043	0.035422	0.011497	100.194	100.194	28.5238	44.1174	2.04366	8.30901	0.0612248	0.019304	99.8756	100.047	35.9472	56.9887	3.62961	13.3261	0.107961	0.016742	72.2771	81.6925	24.3884	43.5981	2.233	8.50779	0.0576231	0.0111681	68.5105	79.6829	23.3963	42.469	2.15834	7.88746	0.0514211	0.0109619	99.9121
IR117834-12-1RGA-1RGA-1RGA-2	12.7377	37.192		18.8255	1.32428	3.57743	0.006039	0.003064	7.68377	10.4295	18.6692	21.1355	1.509	1.18307	0.013536	0.002667	73.1887	73.1887	16.3513	23.1455	1.69318	6.30845	0.0184993	0.004346	78.6234	78.6597	20.6684	33.722	2.01435	7.29546	0.034806	0.009878	40.5674	50.0858	14.4534	24.6081	2.00478	5.80033	0.0223082	0.00665832	46.3448	56.4312	15.2464	25.7058	2.05074	6.70127	0.0282377	0.00695386	77.522
LINGWELINGWELI	26.907	57.5854	10.8991	26.791	1.23295	4.8775	0.012486	0.002786	37.5589	52.6338	16.0296	33.6555	1.65133	9.16067	0.025052	0.004841	100.266	100.266	22.6407	32.7611	1.78505	6.81778	0.0333955	0.006396	100.148	100.242	24.421	44.6546	2.32341	8.07869	0.056662	0.007366	69.0796	81.8656	20.0001	35.3772	2.1014	7.76672	0.0366698	0.0069594	65.6552	77.5487	18.8679	34.695	2.05463	7.49922	0.0377789	0.00705095	100.057
KISEGESE	52.8137	61.9479	17.1504	36.3716	1.50169	5.87486	0.029517	0.007718	43.0612	64.1607	20.2006	40.0327	1.90859	8.60883	0.037434	0.00926	100.472	100.472	30.753	46.9955	2.08691	8.58685	0.0626833	0.012077	99.8973	100.13	34.4932	57.1079	4.14707	12.9578	0.127166	0.027663	70.993	80.5624	25.1508	45.105	2.23349	8.43526	0.0614703	0.0128036	69.9564	79.2836	25.5733	44.8424	2.23586	8.18274	0.0587668	0.0126632	100.068
RUMBUKA	38.3387	77.5512	11.1076	28.1775	1.37406	5.34718	0.017317	0.004734	33.9088	61.2129	14.121	33.9225	1.80952	7.18675	0.023433	0.004733	95.2835	95.2835	21.4388	28.5102	1.81692	7.99226	0.0324848	0.007128	100.488	100.311	26.6158	46.4764	3.40739	8.65987	0.073298	0.014185	66.2437	80.2026	18.6731	33.389	2.10456	7.99116	0.0375533	0.00861355	65.2549	78.6783	18.5434	34.0522	2.12132	7.5931	0.0402942	0.00872907	97.5772
ITA304	31.909	52.944	12.7	25.4646	1.44226	4.91703	0.018407	0.00497	50.9042	58.7871	18.2558	37.075	1.96047	8.32399	0.03522	0.010758	99.651	99.651	23.7812	33.8534	2.07701	9.87533	0.0485691	0.014404	99.3478	99.6545	26.4554	44.296	3.56184	8.00408	0.083007	0.015711	69.7691	79.2535	20.4307	34.9142	2.2117	7.50851	0.0459722	0.010664	67.7431	77.5326	20.3113	35.29	2.2093	7.76082	0.0473295	0.0107083	99.4221
LOYA	44.8213	80.5444	10.9026	32.3416	1.31324	4.93871	0.024846	0.00602	46.5959	69.2331	21.3072	45.5155	2.11436	9.42122	0.044975	0.012882	100.022	100.022	32.0871	48.129	2.08442	10.7345	0.0749123	0.017931	100.214	100.435	39.5346	60.9692	3.67356	10.1888	0.11651	0.020111	70.0281	81.3499	26.2278	46.6823	2.21908	8.28611	0.0632828	0.0124656	69.3525	81.4842	25.834	45.8425	2.18371	8.11759	0.0605173	0.0123315	99.9554
MPEMBUKE	45.1772	69.591	16.3357	32.0339	1.45316	6.88526	0.02281	0.005672	46.3664	71.1546	17.5561	36.0889	2.05332	10.4461	0.038065	0.007475	100.436	100.436	25.4167	39.6651	2.04026	6.97723	0.0499845	0.010649	100.586	100.543	33.7478	46.531	2.83239	10.1824	0.080964	0.013908	70.233	82.0739	22.3021	38.7441	2.15546	8.22061	0.0466493	0.00988838	69.5012	80.8465	22.7925	38.9537	2.19647	8.10818	0.0495665	0.0100266	100.317
KYELA	51.9798	77.7338	13.9749	30.7585	1.41791	5.49707	0.021033	0.005388	26.3859	37.7009	15.2661	40.2813	2.02714	8.88057	0.030689	0.006812	100.173	100.173	27.2414	43.1911	2.00945	9.03287	0.0599298	0.017371	101.157	100.763	37.2053	62.812	3.25128	9.64439	0.102535	0.016086	70.7479	82.0839	23.7004	44.0018	2.20763	8.32878	0.0569798	0.0109988	67.7932	77.6231	23.347	43.1933	2.18463	7.93476	0.0521698	0.0108126	100.405
KIHOGOREDMOROGORO	66.5247	83.762	13.3491	32.592	1.34171	4.11024	0.021946	0.004612	51.3758	64.6363	22.7262	41.6235	1.94567	6.78457	0.029548	0.005205	100.168	100.168	31.5255	47.1917	1.95172	9.96987	0.0562543	0.019519	99.5116	99.606	40.6062	58.5226	3.47537	10.3004	0.099127	0.017314	76.3844	84.1283	26.8065	45.0466	2.1732	7.83328	0.0523523	0.0106514	72.8167	80.9169	26.4431	44.4781	2.15064	7.69183	0.0511478	0.0105756	99.7565
WABS450	31.1007	65.5426	9.09067	27.5846	1.3729	6.12004	0.014855	0.005093	6.11799	34.3447	10.9491	34.0089	1.68301	10.3673	0.036716	0.006276	100.173	100.173	21.2371	34.6351	1.96123	8.89153	0.0430042	0.010829	99.8088	100.094	32.4892	46.042	3.30834	11.5161	0.095735	0.016309	65.0755	78.6076	18.5921	35.7025	2.14459	8.41564	0.0435617	0.00965958	61.832	76.0151	18.6277	35.7731	2.15045	8.28282	0.0454914	0.00977718	99.8761
TXD306-SARO5-IMRPOVED	11.8598	40.9698	9.11126	25.6864	1.44076	3.53589	0.017172	0.004811	8.63172	30.3981	13.6377	29.0101	1.63349	6.5461	0.020888	0.004092	100.454	100.454	23.2198	34.2814	2.15641	8.4063	0.0633468	0.014591	99.9244	100.042	29.1045	43.6986	4.25207	9.41017	0.115641	0.028976	55.6802	68.7268	19.1941	33.3091	2.22198	7.19719	0.0510271	0.0110284	59.6336	73.5391	19.2505	33.7144	2.23101	7.42059	0.051601	0.0111079	100.067
KOMBOKA	33.7626	70.5257	12.2783	31.1098	1.42968	7.38941	0.022879	0.007201	17.2082	31.286	15.0782	30.9453	1.38539	6.45255	0.016693	0.002348	100.325	100.325	21.8698	28.5093	2.04751	8.3581	0.040142	0.010337	100.69	100.778	23.3523	40.287	2.90266	6.27535	0.0644	0.011104	63.1197	75.023	18.3787	32.6506	2.16923	7.53719	0.0422829	0.0100978	63.9531	76.3033	18.5152	33.2444	2.17659	7.76864	0.0435218	0.0101586	100.3
KATUMAHI	69.1973	87.368	18.7802	37.419	1.55011	5.67631	0.029063	0.007383	55.047	68.9796	21.4163	44.186	2.09414	11.7398	0.043132	0.012915	100.408	100.408	34.4132	48.8672	2.13458	14.141	0.07726	0.019739	99.7695	99.7115	38.1681	57.2779	4.3033	9.36389	0.109972	0.020199	78.3437	86.0587	28.7972	47.1622	2.28324	8.78174	0.0656053	0.013505	73.8288	81.8479	28.1328	46.488	2.26866	8.70485	0.0620464	0.0133026	99.983
AFAAKIKANGAGA	36.9619	63.8874	12.7771	29.2742	1.41286	5.02787	0.017643	0.005473	58.7573	73.6349	20.0483	40.7239	2.12839	9.38966	0.039294	0.009053	100.44	100.44	28.4518	42.6738	2.07052	8.37669	0.0507238	0.010406	100.161	100.155	37.8548	61.9866	3.22726	11.279	0.133269	0.016642	76.2731	85.3497	24.6727	43.2571	2.22713	8.30256	0.0541729	0.0104137	71.306	81.8787	24.4052	42.8563	2.2073	8.0351	0.0523429	0.0103054	100.232
FAYA14M69	54.8574	77.9798	15.5955	37.0554	1.55055	6.83978	0.029769	0.011753	34.3642	47.682	21.2766	41.5923	2.06089	7.0988	0.040428	0.013804	100.468	100.468	34.9691	47.8902	2.15838	8.84649	0.0584266	0.015454	100.562	100.381	39.1637	59.39	3.59126	12.5996	0.098371	0.016939	75.3569	83.4285	26.534	44.0423	2.22874	8.12241	0.0569577	0.0119252	72.923	81.6404	26.3476	43.482	2.24192	8.37342	0.0543381	0.0118146	99.74
AFAAMWANZA	43.2733	72.0299	19.022	36.2901	1.50192	4.91657	0.025337	0.00601	45.5821	51.9488	26.4799	41.8045	2.05624	7.77438	0.026253	0.006276	99.9333	99.9333	30.2523	43.2724	2.12123	8.43694	0.0593162	0.013922	100.757	100.695	25.6526	55.8697	3.69568	11.0778	0.107246	0.017232	74.0384	82.8306	25.0383	44.1361	2.21956	7.89895	0.0556143	0.0109346	69.0268	78.7171	24.807	43.5436	2.23827	7.82639	0.053618	0.0108195	100.126
NERICA7	40.4577	82.7284	13.3776	26.4531	1.34741	5.49427	0.014052	0.004269	46.0965	54.7241	16.4731	36.5074	2.4891	10.5644	0.033103	0.005705	100.354	100.354	24.3225	36.0645	1.97675	9.54681	0.046255	0.011695	99.8619	100.023	31.6329	49.2227	3.11022	10.2791	0.097576	0.018765	69.3289	80.749	21.1411	36.9553	2.16583	8.45408	0.0442546	0.00946052	68.6265	79.841	21.2875	36.931	2.17062	8.16822	0.0457443	0.00956126	99.9914
MOSHIWASIGARA	10.0783	59.3083	10.2367	26.7539	1.42645	4.8342	0.01778	0.004628	21.6284	41.8597	13.321	30.3078	1.54915	6.72105	0.015651	0.003128	100.331	100.331	28.9493	46.2346	2.00132	7.93073	0.0651531	0.014698	99.6723	99.7496	33.3516	47.1435	3.62073	7.97806	0.097871	0.014207	64.6962	79.3379	22.7876	39.0928	2.20984	8.01498	0.0539221	0.00962584	61.0565	76.3043	22.3882	38.7397	2.17491	7.41307	0.0501716	0.00944741	99.9043
ZAMBIA	32.267	69.1649	12.0477	27.7603	1.42572	6.15019	0.020697	0.006084	45.2077	66.0751	20.0394	43.4965	2.07962	8.13531	0.042005	0.014508	100.178	100.178	28.3298	46.5523	1.99249	8.9811	0.0665348	0.01633	100.674	100.49	34.9445	55.9081	3.00601	11.1978	0.095069	0.021601	69.7752	81.1024	23.8316	44.0202	2.21052	8.36899	0.058816	0.0126148	67.5117	80.1376	23.6331	42.9119	2.18075	8.10673	0.0547601	0.0124785	100.217
IR127795-1121-1-1-2-1	0	21.5691	8.85313	20.1383	1.35552	4.15703	0.010118	0.003512	10.2618	24.8735	23.7678	22.3081	1.37483	5.06013	0.030091	-0.00121	81.5581	81.5581	17.046	28.3001	1.82464	6.10079	0.0316533	0.009466	78.1394	79.8291	24.1406	38.8447	2.89557	8.13817	0.077224	0.012242	41.3174	55.5699	16.4754	28.001	2.07207	6.5644	0.0343962	0.00762136	44.8485	59.6153	16.6905	28.8379	2.1023	7.04091	0.0380714	0.00775749	81.6444
NEMEYUBUTAKA	40.9585	63.8828	11.4253	27.9791	1.51909	5.64058	0.020603	0.006326	30.515	66.3816	17.9573	33.0571	1.98284	8.90152	0.027331	0.00727	100.476	100.476	23.5245	29.7356	1.87656	8.54807	0.0366516	0.009403	100.121	100.044	27.8567	47.457	3.12992	9.45725	0.081844	0.011712	66.2154	80.3263	19.5032	34.0766	2.11169	8.04577	0.039829	0.00987849	66.701	79.7828	20.1524	34.3646	2.17485	7.8992	0.0437154	0.0100182	100.157
BARAMATA	33.6863	67.8162	12.7075	32.2663	1.40937	4.63375	0.018626	0.003629	28.954	53.2824	17.0666	40.6236	2.22375	10.0581	0.041714	0.007616	100.191	100.191	29.6937	44.4388	2.15081	10.0195	0.0660998	0.021693	100.817	100.595	37.1422	56.3813	3.58578	9.70756	0.106957	0.016029	68.1861	80.6416	24.5886	43.3338	2.23792	8.40291	0.0595493	0.0106975	65.5358	78.5516	24.2937	42.9798	2.22805	7.99226	0.0546371	0.0104973	100.28
MOSHI	53.9404	82.5143	21.3645	28.9182	1.40556	5.5802	0.018271	0.006209	67.0613	78.7485	24.728	42.3584	1.8456	7.01259	0.031025	0.005574	100.398	100.398	36.0328	51.079	1.9997	7.97501	0.0634501	0.014039	100.458	100.469	38.9622	57.122	2.8377	10.1754	0.083727	0.011728	78.3075	85.7911	30.3674	45.2936	2.17316	7.78199	0.0525138	0.0104158	73.5677	82.8584	29.8097	44.5937	2.16668	7.739	0.0507744	0.0103444	100.248
MWASUNGO	58.2672	70.7839	17.1438	33.2915	1.51459	6.16084	0.020267	0.007083	62.738	78.876	20.6158	43.6748	2.15026	10.4456	0.046024	0.010923	100.076	100.076	30.6054	45.9748	2.06117	7.67352	0.0615341	0.012361	99.7881	100.037	35.1423	56.7698	3.32157	8.96232	0.106275	0.015212	78.6656	86.776	26.4485	45.035	2.23873	8.26624	0.0573059	0.0117144	73.2105	81.5642	25.6701	44.3578	2.22842	7.97121	0.0545248	0.0115594	99.8169
NIWAHI	39.5308	81.2971	12.8129	29.1088	1.34323	5.09646	0.020337	0.005748	44.8347	71.1352	14.5279	37.8618	2.08577	8.432	0.034443	0.00866	100.44	100.44	29.6581	41.8099	2.08328	8.68545	0.0603701	0.01633	100.315	100.282	37.9367	58.1943	3.79793	9.32712	0.112618	0.019106	68.8283	81.0372	24.1437	41.9423	2.23708	8.40947	0.0584214	0.0115552	68.464	81.7297	24.1101	41.1417	2.19263	7.77319	0.0532073	0.0113693	100.213
KALIVUMBULA	17.9249	49.7238	10.7757	29.1455	1.26961	5.93726	0.01108	0.003413	52.8367	67.4572	16.7951	38.334	1.62891	6.32934	0.025228	0.00443	100.439	100.439	23.6079	34.2368	1.7224	8.47122	0.036421	0.006131	88.9584	95.6051	26.5251	41.404	2.49189	8.75943	0.038577	0.008063	64.5862	78.6321	19.2369	35.6746	2.03913	7.74042	0.0333289	0.00722896	63.9498	77.3327	19.6754	36.0891	2.05059	7.68447	0.0368095	0.00735941	95.7661
USINIGUSE	67.7687	76.9737	17.6514	33.7378	1.43583	6.12066	0.025413	0.008231	53.193	69.0326	21.5458	44.8009	1.97093	9.24729	0.037999	0.008323	100.26	100.26	28.6133	41.4375	2.04741	8.58052	0.0531823	0.012053	100.79	100.684	37.1847	58.8313	3.66036	8.71942	0.115273	0.021867	75.5464	82.7212	25.6049	44.2219	2.23255	8.30196	0.0566231	0.0125131	73.5883	81.2027	25.4331	43.588	2.20298	7.94823	0.0538225	0.012363	100.309
JARIBU	58.3223	80.5412	11.0453	26.718	1.45753	6.42207	0.019707	0.00544	34.7686	57.8112	13.3002	34.4828	1.72083	8.34542	0.022031	0.0085	100.231	100.231	26.8363	38.114	2.0902	7.80334	0.0495747	0.01159	100.012	100.062	33.8869	52.3645	3.52785	8.63084	0.107058	0.01693	69.4447	79.2539	21.8424	37.8361	2.21039	7.97263	0.0483969	0.0104348	69.5757	80.0319	21.8001	37.7865	2.20924	7.842	0.0481594	0.0103912	99.9854
SUPAINDIA	39.028	65.0679	12.5312	31.0525	1.4432	5.87917	0.020832	0.006055	27.9904	45.1926	13.723	38.5931	1.90551	8.70284	0.036554	0.007389	100.221	100.221	29.5424	47.1645	2.11952	9.18052	0.0693035	0.016882	100.072	100.267	38.3663	55.6168	3.64769	11.9472	0.117478	0.020863	64.1149	76.2145	24.1279	43.0776	2.2409	8.60635	0.0609224	0.0117532	65.9801	77.2943	23.9823	43.0193	2.21958	8.17604	0.0564222	0.0115766	100.003
IR121183-5-2-1-1-B	0	5.05561		16.6325	1.14971	3.73213	0.004007	0.002628	2.76057	5.93763	13.066	30.599	1.34746	4.36295	0.012998	-0.00043	63.2443	63.2443	15.651	25.2409	1.84219	7.01955	0.0249153	0.008675	66.083	65.6238	23.5849	36.2936	2.60338	4.3216	0.041476	0.008843	30.7873	38.1443	13.5142	26.923	1.99915	5.89635	0.023266	0.00625429	37.2014	46.4498	14.5438	27.9526	2.05265	6.71174	0.0294759	0.00654481	67.4101
IRRI214-TAI-	26.4066	51.4078	10.4012	26.7547	1.40816	5.24273	0.017925	0.005977	19.5246	41.2019	13.6507	31.7463	2.01387	5.89593	0.020686	0.005571	100.198	100.198	18.7994	29.1356	1.93788	7.39508	0.0396382	0.009129	100.196	100.162	30.23	47.9453	3.85083	9.61135	0.094186	0.02022	62.3306	73.9609	17.6103	33.0969	2.14146	6.8317	0.0396433	0.0100805	63.1146	75.6513	17.8852	33.7244	2.17298	7.4864	0.043618	0.0102696	100.04
LIMOTA	33.7863	57.0959	11.2377	32.5779	1.44129	4.35401	0.019305	0.006302	29.7038	54.7504	15.8442	38.7418	2.04303	7.69573	0.032627	0.007662	99.9202	99.9202	27.2737	43.1808	2.00377	9.12116	0.0560015	0.012898	101.008	100.478	33.8217	55.0583	3.24488	9.41353	0.080361	0.013265	74.404	84.1433	22.7367	42.5881	2.1959	7.92876	0.0509935	0.010725	65.6009	77.72	22.3239	42.0877	2.18992	7.64813	0.0491884	0.0106305	100.209
SUPABCIMPROVED	25.7291	56.8063	14.4712	28.7395	1.49341	6.83828	0.026266	0.009703	2.64203	28.7822	11.4578	27.5323	1.75562	5.38718	0.018928	0.003884	100.462	100.462	21.4	31.9934	2.13078	8.01374	0.0537682	0.015924	99.633	99.5851	27.1878	42.3609	3.17494	7.92474	0.09966	0.020041	55.5165	68.7381	18.6115	32.2837	2.18462	6.78793	0.0477568	0.0124402	60.7464	74.5696	18.8033	32.9981	2.22008	7.55028	0.0501786	0.0126359	99.954
SUPAKIJICHO	19.6168	41.1707	12.288	28.2894	1.49537	4.91762	0.015998	0.005555	75.9424	87.3524	19.8922	40.7343	2.02684	9.67334	0.041171	0.007716	100.468	100.468	26.4063	40.0078	1.98392	8.4296	0.0465295	0.008144	99.8109	99.9886	32.5553	52.2433	3.2514	9.46485	0.090664	0.012257	70.5963	80.8355	22.5843	40.2379	2.17395	7.76589	0.0469816	0.00953954	69.8929	80.201	22.4891	39.9254	2.19941	7.8227	0.0470925	0.00954549	100.031
MWANAMATONGO2	45.6874	74.935	14.1363	24.2725	1.41252	4.87198	0.015091	0.005149	46.491	56.4815	20.1829	43.5185	2.04962	10.469	0.042316	0.010207	100.524	100.524	31.9566	47.5242	2.06345	8.85977	0.0636586	0.013519	100.917	100.683	38.5215	54.9158	3.94135	9.67977	0.124864	0.026376	71.0316	81.6759	26.3946	42.7841	2.25146	8.62023	0.0588408	0.0116498	69.7115	79.6572	26.1108	42.1925	2.20715	7.9353	0.0539052	0.0114498	100.495
IRRI213	32.0239	70.259	10.0176	24.6825	1.43522	3.53102	0.014537	0.006486	31.5191	48.4121	12.6158	35.8015	1.63369	6.86536	0.021439	0.006995	100.441	100.441	22.0473	30.9684	1.89905	8.22264	0.0424189	0.010013	100.061	100.12	25.0909	40.8488	3.15538	7.56021	0.061702	0.011166	63.8903	76.0344	17.8492	32.9231	2.10214	6.56408	0.0360767	0.00994074	65.5622	78.1274	18.1273	33.3632	2.14771	7.20898	0.0409072	0.0101118	100.114
LIFUMBA	29.4165	55.7448	13.6013	30.1631	1.42929	5.95461	0.023468	0.008972	24.1008	37.9501	17.5712	43.0092	2.09133	9.99325	0.040595	0.011246	100.585	100.585	30.7444	44.5147	2.1501	7.2611	0.0682399	0.01346	100.681	100.723	41.264	58.1021	3.82298	9.76546	0.1131	0.017219	66.1324	77.2752	25.8348	43.731	2.23461	8.43688	0.0612933	0.0130328	64.3942	75.9111	25.6442	43.1815	2.2318	7.91648	0.0573134	0.0129396	100.432
UMANHO	53.7848	81.5532	12.4026	34.2208	1.44945	5.56503	0.020233	0.005515	34.5278	59.5909	24.1239	41.739	2.40668	8.78172	0.056923	0.01582	100.505	100.505	34.1157	48.2358	2.06613	10.0611	0.0750068	0.020739	99.921	100.023	37.8006	59.2485	3.90363	8.5448	0.096267	0.018709	71.2564	81.8443	26.9083	45.8018	2.21981	8.24196	0.0606296	0.0127712	68.8742	80.396	27.0542	45.3556	2.22907	7.97406	0.0589492	0.01269	100.094
RANGIMBILINYEKUNDU	43.9194	71.0184	13.5673	30.6129	1.39091	5.39967	0.020229	0.004007	33.9956	51.6123	18.0717	39.2714	1.99054	6.87939	0.032574	0.008686	100.362	100.362	30.2255	44.9229	1.917	8.79056	0.050222	0.010803	99.5195	99.841	34.2402	56.0583	3.03101	9.92498	0.087975	0.012214	68.4971	78.9898	24.5685	42.7353	2.18485	8.03422	0.0510367	0.00927154	67.36	78.4497	24.3329	42.4113	2.15067	7.75976	0.0484445	0.00915311	99.8628
SUMBAWANGA	35.0331	75.731	17.2787	32.7311	1.42986	6.82045	0.025237	0.007941	46.5797	59.5553	17.6424	41.895	1.91302	8.63486	0.030845	0.008361	100.56	100.56	29.724	39.6334	2.12712	9.39161	0.0570659	0.014158	100.472	100.609	37.63	55.867	3.73937	10.9368	0.107063	0.024896	69.6621	81.7475	24.5487	42.2573	2.2378	8.41897	0.0589298	0.0128631	68.1689	80.0752	25.3758	41.7418	2.21989	8.27598	0.0533468	0.0127221	100.337
INTSINZI	0	55.9202	7.45167	20.7839	1.30047	3.58097	0.01058	0.002277	13.2721	52.1204	12.4138	32.0129	1.62841	6.42128	0.021159	0.003222	100.36	100.36	19.9674	26.5393	1.90854	7.52292	0.0361114	0.008929	99.3936	99.7971	23.6455	36.5745	3.09812	5.34087	0.063614	0.008527	55.8735	75.0789	16.6297	29.2554	2.0965	6.6366	0.03501	0.00695779	57.5642	77.2522	16.5601	29.5667	2.11351	6.93883	0.0377823	0.00698449	99.814
JARIBU220	31.0934	51.1443	12.8718	30.9197	1.49896	6.73408	0.023302	0.007338	45.9651	65.6557	17.3151	37.2413	2.17434	9.92804	0.036159	0.009802	100.345	100.345	27.326	38.3625	1.94216	7.71209	0.0497919	0.010202	99.3555	99.6282	32.1113	50.3735	3.28459	9.11772	0.08605	0.017378	69.6766	79.5747	22.3543	39.2388	2.2218	8.08017	0.0510233	0.0114854	67.2926	78.4983	22.5757	39.0993	2.19501	8.04291	0.0498087	0.0114495	99.7891
SOTEA	45.8065	68.7882	15.2962	28.9755	1.262	4.98893	0.015105	0.002968	41.8174	56.8878	19.5115	35.7834	1.83796	6.64684	0.025908	0.008185	100.029	100.029	30.4415	45.6234	2.05517	8.66038	0.0536961	0.012705	100.153	100.114	34.0706	57.0758	3.65803	8.37618	0.095838	0.010751	70.2514	81.1919	25.1335	42.0559	2.17401	7.81823	0.0489343	0.00873771	68.7585	78.8734	24.9126	41.7338	2.15283	7.54202	0.0471452	0.00862614	99.9364
TXD88IMPROVED	8.17477	28.6538	9.55478	27.9924	1.50089	5.4837	0.024864	0.00616	11.0029	27.3628							100.36	100.36	24.6864	32.7225	2.08638	7.14269	0.050862	0.009504	100.043	100.211	26.9416	45.833	4.30313	9.29797	0.112815	0.020377	52.8199	65.4126	18.9135	33.8572	2.23505	7.25005	0.0508233	0.0106392	59.4623	72.1714	19.7041	35.0927	2.2401	7.60567	0.0524338	0.0107364	100.065
MKIAWANYUMBU	52.3745	73.6519	16.9785	35.6502	1.54975	6.11601	0.028251	0.010715	50.9473	71.564	19.3017	41.4051	1.93777	6.96498	0.035325	0.005808	99.9002	99.9002	30.2201	42.7478	2.03495	9.24391	0.0552225	0.010252	100.419	100.362	34.1476	54.3494	3.82394	8.85865	0.115296	0.018136	74.8782	84.2192	25.4985	43.628	2.23532	8.08736	0.0572397	0.0129909	70.9239	81.023	25.1488	43.1132	2.23257	7.85517	0.0551558	0.0129196	99.9735
KACHIKOPE	48.0104	80.3356	15.1092	32.0056	1.39204	5.35076	0.020194	0.006688	51.5828	65.6529	22.4965	42.9705	2.05163	10.3687	0.039924	0.01082	100.386	100.386	30.4637	43.7201	2.03183	8.13129	0.0583243	0.013305	100.17	100.359	33.3567	52.7662	3.21037	8.90464	0.095182	0.015378	71.6812	82.7728	24.6006	42.0701	2.21341	8.10215	0.0541713	0.0115999	70.5979	81.125	25.1785	42.5585	2.18353	7.88298	0.0520988	0.0114699	100.129
RUMBUKABUG2013A	33.9475	65.487	14.5959	31.8354	1.47622	7.33892	0.019186	0.006993	60.3201	76.0566	18.9705	38.4251	2.17684	8.20599	0.031344	0.005629	100.509	100.509	23.0418	37.3828	1.97958	8.14066	0.0506674	0.011521	99.8282	99.9579	30.9923	47.9805	3.34856	8.9373	0.075024	0.011884	69.5257	80.5202	20.9336	38.5102	2.16189	8.26376	0.0445158	0.0103152	69.7416	80.9368	21.2176	38.8464	2.19931	8.0362	0.0471213	0.0104586	100.061
TXD307	0	37.2414	8.45205	21.2189	1.21906	4.31072	0.009217	0.002867	0	17.9797	9.52921	26.0379	1.69317	4.96913	0.017413	0.002809	100.242	100.242	19.7348	29.9725	2.05323	7.82712	0.0431461	0.009446	99.5831	99.7639	23.6536	38.8481	3.70403	8.96626	0.081763	0.019397	51.269	66.1401	16.3708	29.3181	2.14551	6.64083	0.0378852	0.00810842	54.4912	71.6458	16.3373	30.0317	2.13659	7.256	0.0399704	0.00819791	99.8216
KIGEGA	8.64598	30.3871	10.2162	21.775	1.35569	4.0255	0.010255	0.003752	2.60826	10.8556	11.4632	30.4863	1.67422	5.50876	0.019369	0.004641	100.041	100.041	19.6848	28.4209	2.03967	7.21641	0.0378504	0.015062	100.178	100.288	27.6669	42.1218	3.09011	9.56444	0.087318	0.018596	53.4135	64.569	16.973	30.4533	2.13545	6.84733	0.0368118	0.0094541	58.3817	70.3529	17.4476	31.0988	2.16036	7.23559	0.0396492	0.00953828	99.9509
CYICARO	46.1548	67.2685	12.4822	23.8351	1.44788	4.51935	0.012773	0.00389	36.889	57.0945	15.551	39.5487	1.72274	8.10604	0.025247	0.003003	100.131	100.131	24.8878	36.71	1.96489	7.57063	0.0413175	0.008681	100.029	100.127	31.5579	47.9427	3.07549	8.58107	0.077565	0.010597	69.1399	81.1898	21.3039	36.75	2.14341	7.9923	0.0396916	0.00787459	68.098	78.7948	21.1982	36.8426	2.16918	7.47879	0.0415161	0.00796572	99.9398
JAMBOTWENDE	26.9594	98.3881	11.2562	30.4241	1.38441	5.22755	0.016473	0.004374	26.1366	42.7561	12.2075	27.181	1.53527	6.4876	0.018236	0.003789	100.161	100.161	24.884	40.6207	1.95826	9.30526	0.045971	0.010964	99.4093	99.3388	26.7937	47.4982	2.42316	8.4887	0.056563	0.006934	68.1778	82.616	19.7857	36.8677	2.10084	7.71367	0.0383148	0.00820394	63.9031	79.4529	19.8776	37.3415	2.1354	7.64835	0.0418902	0.00834076	99.709
FASHINGABO-BUG2013A-	60.0002	75.8511	12.3594	29.5347	1.46305	6.60923	0.018084	0.005665	62.3499	66.9529	18.1697	35.671	2.06148	7.68878	0.031666	0.010003	100.371	100.371	26.8926	43.3562	2.11056	9.30574	0.0578077	0.009943	99.5777	99.9536	29.7769	49.5466	3.65531	8.31323	0.097803	0.016005	71.9701	80.1454	22.7487	39.6571	2.24052	7.83587	0.0497103	0.0104178	73.5865	80.7755	22.0331	39.9138	2.22884	7.95697	0.0502894	0.0104225	99.8884
SUPAKIJIVU	31.4961	70.1071	11.0533	25.5381	1.30666	4.17514	0.015594	0.004172	44.5668	55.9732	19.5928	40.7127	2.29441	9.97937	0.03691	0.010329	90.3876	90.3876	29.8687	45.9752	2.06316	10.4129	0.0675995	0.018107	100.36	100.578	38.4066	56.4807	3.38722	10.4505	0.113368	0.020397	60.6957	73.7303	23.6591	41.9379	2.22683	8.52862	0.0583141	0.0112338	64.2495	76.0726	24.7054	41.7985	2.17863	8.00449	0.0537505	0.0110389	95.0058
IR117842-11-1RGA-1RGA-1RGA-2	0	18.8952		15.4355	1.26796	2.59128	0.006926	0.001738	0	9.84935		23.0536	1.38845	4.87058	0.015088	0.002423	88.6405	88.6405	19.3676	25.8785	1.73485	6.5501	0.0254373	0.006585	86.3031	91.4799	21.3721	35.3399	2.21919	6.56252	0.032824	0.008258	44.041	60.6349	15.5453	25.1116	2.01779	5.90181	0.024649	0.00593203	47.527	63.2508	16.0255	26.3123	2.04641	6.78603	0.0301792	0.00625302	88.5692
NERICA1	3.19709	29.4858	11.0929	24.8999	1.41811	4.99007	0.010135	0.003331	8.49417	20.9558	16.4966	31.2287	1.74755	6.54631	0.045207	0.012409	100.238	100.238	21.9828	32.1146	1.88411	10.006	0.0422969	0.009419	92.0616	93.5859	29.4982	44.7166	2.72863	9.05548	0.065041	0.011136	56.5731	72.3208	19.3241	33.0154	2.11316	8.01456	0.039811	0.00888921	56.6081	69.6102	19.4559	33.5581	2.13717	7.73047	0.0425216	0.00901095	96.9131
TERIMBERE-LL29-	39.2166	63.0619	13.2556	23.3966	1.38497	4.66786	0.012983	0.003534	50.0727	69.8685	16.941	38.2742	1.96976	8.86608	0.030144	0.00961	100.077	100.077	23.941	30.4459	2.02753	9.00699	0.0398063	0.011014	99.4169	99.5321	24.0304	45.5147	3.86996	8.7035	0.092982	0.015224	68.6264	79.328	20.1178	33.6427	2.18141	7.19981	0.03958	0.00916136	68.8281	79.7597	19.8711	34.0893	2.18753	7.72165	0.0428665	0.00928101	99.6712
CHUPA	38.5472	75.7835	13.8067	32.5905	1.524	4.55282	0.024616	0.005577	50.8037	70.0257	17.5676	40.8057	1.87879	6.22304	0.02786	0.005719	100.06	100.06	32.2122	44.3952	2.0673	10.9996	0.0579489	0.011058	99.7259	99.9697	35.104	56.2009	3.61275	9.93712	0.112814	0.016715	69.6458	81.5519	25.5403	43.4173	2.22493	8.15027	0.0558423	0.010174	68.879	80.9303	25.2543	43.0535	2.22784	7.80348	0.0533638	0.010031	99.784
BG90-2	0	6.89046		19.1009	1.39519	3.83288	0.01054	0.003983	4.41105	8.28689		23.3069	1.49464	5.53445	0.016224	0.003487	99.8047	99.8047	19.3548	25.9445	1.96673	9.55923	0.0397476	0.012628	99.4362	99.6265	23.8533	34.374	3.1465	7.79547	0.065347	0.012197	48.8202	63.5768	16.2757	26.0435	2.15622	7.13415	0.0361441	0.00878474	54.1437	67.8819	16.4528	27.1102	2.15377	7.36605	0.038522	0.00883554	99.5369
SUPAKATRIN	28.2459	59.4956	12.2108	30.2127	1.47687	6.54134	0.021426	0.007682	35.6412	57.2668	17.0587	42.0819	2.26705	10.3069	0.041374	0.010901	100.506	100.506	29.3651	43.3817	2.09721	10.6658	0.066875	0.020928	100.252	100.466	31.7053	49.2145	3.4272	10.634	0.09961	0.020602	65.051	77.4004	23.2412	41.8038	2.24698	8.63584	0.0600384	0.0135458	65.6584	78.3655	23.1651	41.2143	2.2328	8.4761	0.0553894	0.0134124	100.224
SERENA	0.672423	32.634		9.59613	1.1548	2.39426	0.003133	0.001525	0	-0.03229	12.9946	23.5869	1.42807	5.99956	0.013795	0.00336	100.168	100.168	22.9228	31.9073	2.07609	7.79405	0.0437479	0.015187	100.059	100.079	25.4106	41.5423	3.74399	8.81911	0.085403	0.01841	50.4498	65.3388	18.3169	27.063	2.15732	6.79668	0.0370942	0.00822008	55.3762	69.3006	18.7266	27.8615	2.12258	7.03203	0.0378778	0.00827538	99.9698
FASHINGABO	28.9544	63.9726	20.2801	25.1368	1.45815	4.62984	0.016092	0.006014	42.6572	64.8059	18.2675	35.5015	1.87343	9.29059	0.028426	0.00914	100.48	100.48	26.5442	38.4398	2.11444	7.57101	0.0551005	0.010812	100.506	100.523	31.1759	46.3162	3.54545	11.8148	0.089578	0.016651	71.1791	80.4415	23.2007	36.9311	2.24073	7.83581	0.0480177	0.0106593	66.8137	79.726	23.6832	36.6682	2.2201	7.83747	0.0477838	0.0106682	100.309
CHEREHANI	12.0183	43.7312	12.3409	27.1114	1.37923	4.68644	0.01355	0.004042	10.1144	29.6141	13.8754	38.4587	1.95465	8.6899	0.03896	0.006795	100.139	100.139	30.8983	46.2247	2.10755	9.35125	0.0675368	0.018112	99.7406	99.7931	38.3411	53.657	3.52604	10.6059	0.121318	0.027921	61.1864	73.9423	24.1137	41.7822	2.23194	8.57725	0.058184	0.0113946	59.7236	73.5166	24.702	41.4447	2.1993	7.87043	0.0535137	0.0111914	99.8311
IRRI79511-GWIZUMWIMBU-	0	44.0864	7.54112	19.0794	1.29306	4.38484	0.010872	0.005254	0	6.97823	9.48812	18.3784	1.65341	4.28623	0.013451	0.003736	100.097	100.097	23.0042	28.688	1.81696	9.22511	0.0373575	0.012118	99.5661	99.9331	27.9547	43.5137	3.45847	9.72855	0.080642	0.023993	54.5835	71.3511	18.081	27.4884	2.10231	7.10654	0.0354612	0.0102099	56.0046	71.0109	18.3322	28.4499	2.09679	7.42545	0.0385096	0.010338	99.7405
MWANZA	33.0982	62.2869	15.6413	33.3964	1.46881	6.05503	0.02565	0.007029	37.9808	58.9224	10.5042	36.2912	1.89056	8.37015	0.027397	0.007018	100.118	100.118	30.8123	46.9283	2.04841	7.82415	0.0587379	0.011417	100.502	100.655	38.5684	56.932	3.52344	11.5818	0.110021	0.01591	67.8349	79.7095	24.9281	43.7562	2.21346	8.21828	0.0563963	0.0110758	66.5997	78.7354	24.7578	43.3319	2.20744	8.01761	0.0537404	0.0109852	100.119
MWARABU	31.151	69.5367	12.2303	31.3852	1.50583	5.94534	0.015895	0.00429	47.1635	65.3944	18.3216	41.768	2.02207	8.38574	0.033728	0.008964	100.305	100.305	29.6923	41.9242	2.05622	10.1258	0.0597449	0.014913	100.741	100.537	29.3879	49.6164	3.61962	11.7056	0.109568	0.022647	64.1016	76.9984	23.642	42.3277	2.24587	8.64109	0.0583636	0.0109488	67.7011	80.1204	23.1987	41.0786	2.22454	8.24119	0.0510989	0.010734	100.305
SIFARA	10.7333	38.2625	11.264	33.3445	1.44935	5.73833	0.024236	0.006599	17.878	28.6009	14.3867	41.2457	2.14019	8.50417	0.036688	0.009196	100.631	100.631	28.7098	47.1641	2.06134	9.37547	0.0681784	0.013598	100.823	100.469	37.3496	54.9085	3.5106	10.4017	0.125009	0.023679	60.1803	73.648	23.1786	43.7304	2.2312	8.55419	0.0611528	0.0120891	61.0097	73.2896	23.307	43.9947	2.21355	8.04205	0.0580058	0.0119195	100.514
NAWATULENABWANA	3.8312	27.1547	10.6546	18.6517	1.37818	4.65451	0.011394	0.003783	0	14.2624	11.2687	28.0922	2.00129	3.91344	0.019044	0.005665	100.42	100.42	23.4182	32.7012	2.18319	9.35398	0.0559858	0.015582	99.7945	100.14	29.5075	43.1038	4.30436	9.36246	0.099804	0.015687	53.4873	65.9484	19.3148	31.1776	2.23201	7.26745	0.0457851	0.00953369	56.4914	70.4122	19.4878	31.3795	2.23035	7.51483	0.0461223	0.0095772	99.9995
GAKIRE	16.6794	42.2938	12.9861	27.7535	1.3428	5.65874	0.017582	0.006619	12.6079	47.9761	14.1311	28.3287	1.80757	4.48989	0.018843	0.003794	100.075	100.075	20.9462	30.105	1.80895	8.19412	0.0429392	0.010815	99.5343	99.6421	25.1998	41.1084	3.44856	5.27777	0.071908	0.011376	56.1386	73.7761	18.0168	31.4861	2.09687	6.63454	0.0386855	0.00981287	60.6731	75.46	18.4973	32.5749	2.1141	7.2009	0.0426712	0.00993539	99.7142
TXD85IMPROVED	4.86547	37.0136	8.95182	25.9071	1.47223	7.03804	0.019085	0.006099	3.95615	13.4553		27.4218	1.96264	5.38662	0.019853	0.004667	100.165	100.165	22.4909	31.724	2.09717	10.1183	0.0468086	0.010401	100.652	100.592	27.6454	41.3011	3.49388	7.50033	0.07024	0.013485	52.0823	66.3947	17.8678	32.1298	2.20127	8.16271	0.0458249	0.0100257	58.044	71.246	18.6798	32.6661	2.22231	7.94224	0.0445627	0.00994784	100.203
IR127793-849-1-1-1-3	6.9589	35.3646		19.8164	1.22276	4.76961	0.007775	0.002538	4.51994	11.044							63.7938	63.7938	17.9536	28.7775	1.80126	6.67209	0.0288509	0.006617	63.3389	65.1522	24.541	43.0718	3.10397	7.31767	0.069296	0.011508	36.642	46.3946	15.2592	29.6325	2.0537	6.75392	0.0294977	0.00696144	38.6272	49.5262	15.6771	30.5374	2.07966	7.25984	0.0344807	0.00718361	66.5812
DOMOLAFISI	39.5062	75.4411	16.9347	29.792	1.45165	5.7372	0.021268	0.005159	54.6564	74.4165	21.7595	44.8468	2.14545	7.57935	0.044041	0.011812	100.444	100.444	31.7895	47.5396	2.03653	8.38691	0.0592405	0.011863	100.267	100.46	35.7886	57.2963	3.51678	9.92249	0.101925	0.014865	74.6843	84.4394	26.8346	44.8264	2.2354	8.23405	0.0559009	0.0106724	69.8305	81.7674	26.3681	44.2307	2.20844	7.83233	0.0537436	0.0105236	100.198
TONDOGOSO	30.3273	64.6153	9.73224	25.541	1.3812	4.1273	0.013778	0.003493	12.3358	32.9564	18.7876	39.7092	2.02819	7.83519	0.030273	0.008151	100.694	100.694	26.7122	45.9646	2.05214	8.56184	0.055931	0.013135	99.7716	99.8397	33.0351	57.0734	2.66486	9.42457	0.07982	0.012321	68.2469	79.9694	22.3262	42.0293	2.17966	7.79404	0.0488366	0.00921569	62.795	75.8775	22.1607	41.6149	2.17665	7.55598	0.046673	0.00910194	100.131
FRX78-12	0	40.0567	8.25682	19.3535	1.40038	4.1959	0.011192	0.003487	0	11.7009	13.9259	24.469	1.50949	3.89553	0.012296	0.00317	100.367	100.367	21.247	29.4289	2.02987	6.79966	0.043118	0.01011	99.743	99.9267	24.6188	41.0059	3.62555	8.06051	0.067797	0.013809	50.2695	65.1112	17.1902	28.7626	2.15209	6.5909	0.037598	0.00810569	55.2674	71.0596	17.565	29.4228	2.17347	6.95448	0.039088	0.00820664	99.9529
MBAWAMBILINYEUPE	26.8345	56.4063	12.1379	29.4323	1.4894	4.72206	0.019878	0.007725	49.2501	67.8872	17.9698	42.4121	2.04778	7.03324	0.039003	0.008538	100.507	100.507	29.8044	45.2535	2.07759	7.72379	0.0556638	0.010551	99.8281	99.8428	35.1312	58.8317	2.94613	10.4611	0.102577	0.016047	61.2502	74.154	23.5736	42.5499	2.22725	8.53873	0.0563343	0.00973021	59.4098	73.6056	22.7566	40.4132	2.15738	8.0985	0.0479516	0.00945583	99.8886
LIFUWU	1.47796	24.7857	8.10042	22.757	1.28175	5.13295	0.013082	0.005289	0	19.4923	10.7292	27.5156	1.79651	7.05698	0.023308	0.008235	100.331	100.331	22.1289	28.7349	2.11137	9.44709	0.0457797	0.011105	99.6543	99.9316	25.8041	38.3548	3.68787	8.68936	0.08188	0.016911	52.7776	67.439	17.6997	29.5516	2.16494	7.44472	0.0405379	0.0101516	56.5491	70.8567	17.7943	30.2166	2.17272	7.7049	0.0429253	0.0102138	99.8977
WITA9	29.7028	70.8068	20.6109	30.2079	1.47843	6.35743	0.024211	0.00694	51.8635	81.154	25.9466	37.7346	2.1133	6.0467	0.037924	0.01014	99.7851	99.7851	22.2734	31.0545	1.9505	7.38279	0.0352279	0.006691	99.9574	100.121	25.8186	41.953	2.53197	5.66734	0.070259	0.010675	69.7889	84.7779	22.6941	34.871	2.15798	7.00323	0.0428656	0.0102001	67.7697	81.7806	22.1588	35.3419	2.17895	7.38539	0.0453434	0.0103029	99.732
SINDANONYEUPE	39.6251	70.929	14.589	31.0189	1.3743	4.4039	0.019916	0.006509	30.7674	45.6007	17.1405	31.2429	1.48778	5.46892	0.012898	0.002421	100.463	100.463	28.0878	35.5686	1.89866	7.43856	0.0368209	0.009882	99.6508	99.8372	34.8754	55.8433	3.48411	7.87341	0.108022	0.017228	68.0623	80.6043	23.7157	38.0427	2.14296	7.62158	0.0438427	0.0100655	66.3815	77.7546	23.6546	37.9906	2.13189	7.18897	0.0435231	0.0100105	99.9669
TUNDURUDIHIMBA	38.1878	67.4925	18.5456	34.1733	1.47971	7.46614	0.031957	0.006648	48.6628	63.0574	19.9641	47.8082	2.26019	9.86025	0.044408	0.010354	100.358	100.358	31.9223	47.9635	2.09438	8.95328	0.0639586	0.017998	99.6238	99.9923	34.8154	57.9078	3.72542	10.4144	0.12659	0.024295	71.3115	83.1488	26.5994	46.9498	2.24967	8.55177	0.0632189	0.0128757	68.625	79.5444	26.3424	46.1806	2.23647	8.3798	0.0607447	0.0127212	99.9034
K5	29.4771	51.7057	18.2586	30.024	1.4724	5.78036	0.025303	0.008671	25.2992	39.7468	15.1045	37.7455	2.31714	6.4688	0.045874	0.011775	100.254	100.254	23.4211	34.383	2.00556	8.6348	0.0481407	0.013057	100.254	100.508	32.1534	47.7529	4.30549	9.38962	0.102954	0.018756	65.7494	76.7002	21.8178	37.1476	2.24537	7.68823	0.0524769	0.0129452	64.3514	75.6139	21.8264	37.2861	2.22368	7.73676	0.0525329	0.0129153	100.093
LINE16	15.7884	60.0668	13.8948	27.5658	1.42957	5.06911	0.017219	0.004893	43.3913	60.1246	19.1703	32.1571	1.84749	7.09576	0.02543	0.006837	100.461	100.461	25.063	37.9299	1.94619	10.3603	0.0503636	0.011681	99.8169	100.054	35.1847	54.7612	3.55445	10.8104	0.11435	0.019456	66.3666	79.1989	22.6345	38.7859	2.16827	8.43289	0.0463899	0.00998292	64.8978	78.6245	22.6151	37.8968	2.17121	7.95646	0.048286	0.0100985	100.029
KIJICHO	11.0204	47.5502	12.2113	26.0855	1.29844	4.86428	0.011357	0.002825	0	27.9105	14.9696	33.5756	1.43495	4.27259	0.019111	0.002994	100.315	100.315	29.2958	38.0476	1.84678	10.2788	0.0484075	0.011306	100.844	100.685	37.0813	54.1519	3.46638	10.4818	0.097461	0.01754	58.9266	74.7164	23.7189	37.744	2.12061	7.78516	0.0445499	0.00833637	58.1499	73.9444	23.7607	37.7203	2.09616	7.66873	0.0435391	0.00827203	100.357
MABULA	40.5094	72.1139	16.2395	22.1869	1.4869	6.10042	0.016967	0.006155	58.7154	76.3775	19.3814	34.304	2.1526	7.73151	0.036833	0.006855	99.9063	99.9063	23.1822	29.305	2.0751	7.43502	0.0370082	0.013174	99.9853	100.193	29.5721	46.7842	4.11568	7.95191	0.100371	0.016071	50.4196	63.7616	17.1346	28.3172	2.16881	6.82761	0.0360296	0.00728937	56.1706	70.2908	17.1804	29.0447	2.13331	7.18355	0.036575	0.0073379	100.041
WAT317-WAS-B-55-11-3-5-1	41.8571	69.5138	15.4652	24.1212	1.43195	3.98055	0.013115	0.004961	49.7737	71.391	19.7323	36.248	2.1446	7.56884	0.03659	0.008382	100.522	100.522	22.7833	34.2247	2.08929	9.11973	0.0422196	0.013222	99.746	100.057	28.0396	46.4269	3.19667	8.0077	0.082783	0.015546	70.8224	81.5912	20.7183	35.121	2.20323	7.51535	0.042462	0.0102009	69.3519	80.755	20.9072	35.2543	2.21102	7.46437	0.0436897	0.0102103	100.034
FRX472	31.9133	65.3574	9.31516	27.3196	1.46646	5.98533	0.018072	0.006259	28.5234	59.9434	15.3769	31.7066	2.02741	8.51818	0.034347	0.011555	100.575	100.575	21.7893	34.1209	2.08049	9.22707	0.0510025	0.015388	99.7312	99.7571	25.3452	42.1905	3.44371	8.82981	0.096166	0.017393	65.9497	80.5043	18.4536	34.2791	2.22974	7.77447	0.0481855	0.0117461	65.1234	79.0148	18.2754	34.4988	2.21802	7.94836	0.0486318	0.0117456	100.055
KAGIHA	19.1306	65.9476		20.1916	1.2366	4.12453	0.007182	0.002466	0	19.028	9.12705	32.578	2.06648	5.68592	0.026005	0.005914	93.7742	93.7742	21.1825	30.4507	1.92169	7.62292	0.038152	0.008501	99.5754	99.5876	23.6528	38.8438	3.73642	8.64441	0.089269	0.016027	50.326	65.7023	16.7139	30.1002	2.15264	6.70286	0.0384808	0.00789564	56.1069	72.156	16.9467	31.1358	2.12311	7.23422	0.0394412	0.00796964	96.4546
MBAWAMBILIKYELA	8.69024	60.1393	11.1919	28.4265	1.33459	4.15422	0.01471	0.00365	10.7656	17.5997							100.29	100.29	26.7168	40.8519	1.99727	12.1392	0.0630881	0.014728	99.6887	99.9677	36.6895	55.9282	3.41479	11.2467	0.095267	0.01541	60.9675	73.9648	25.1438	44.0441	2.23471	8.59729	0.0606321	0.011658	60.089	73.0608	25.6172	43.2596	2.18569	8.12408	0.0558939	0.01143	99.6519
KALALU	21.7827	58.3245	13.4922	28.4875	1.38969	5.4014	0.018702	0.003919	35.4892	41.9528	15.1493	31.8807	1.56119	7.09803	0.018371	0.002943	100.264	100.264	22.3297	31.8104	1.92136	8.49688	0.0291512	0.008944	99.6826	99.9438	27.2928	38.7329	2.11496	7.8641	0.046718	0.010367	61.5165	73.2762	19.3212	32.9476	2.1106	6.98846	0.0333716	0.00781098	64.5571	76.2649	19.6231	33.5011	2.12331	7.58866	0.0373952	0.00798931	99.8738
KACHAMBO	21.6523	58.8856	13.0071	27.4523	1.41734	3.94395	0.019289	0.006586	32.0096	47.3628	15.8298	35.6013	1.81829	6.18868	0.027074	0.008293	95.3328	95.3328	28.1287	42.1641	2.03222	9.23098	0.053372	0.012493	99.9016	100.202	33.3871	51.6631	3.72282	9.07812	0.114968	0.018744	70.0919	82.2521	23.9557	40.6102	2.22241	8.11663	0.0525859	0.0113977	62.6214	75.5006	22.9394	39.3438	2.19015	7.44918	0.0501117	0.0112538	97.3721
FAYA-CHIKUYUMANYONI-	42.9289	69.2675	18.5376	33.3772	1.50902	7.34025	0.02789	0.007648	76.7884	80.9631	22.3982	43.8443	2.08842	9.48794	0.035862	0.009853	99.6232	99.6232	31.2016	43.7947	2.11905	9.75145	0.0741314	0.012754	100.19	100.385	34.8025	55.352	3.55782	9.75521	0.092636	0.015575	78.1097	86.2157	28.8398	46.7323	2.28818	8.85143	0.0644464	0.0152197	69.3307	78.8413	27.8672	45.974	2.26303	8.24556	0.0603365	0.0150168	100.326
FRX92-14	1.65387	40.3052	8.97371	23.4061	1.35837	4.16598	0.01355	0.003868	0	0	18.2038	33.9136	1.5635	6.85741	0.017646	0.005349	100.329	100.329	21.6626	29.534	2.03444	6.04032	0.0418159	0.006768	100.032	100.115	23.4889	37.7888	3.44396	6.6661	0.058627	0.010347	51.0639	64.2474	17.5246	30.6636	2.14151	6.41032	0.0364172	0.00778347	56.3937	69.335	18.0511	31.4821	2.1661	7.00493	0.0399152	0.00798357	100.045
KALUNDI	17.4532	57.307	14.4997	21.6178	1.28693	5.6222	0.01411	0.004108	34.3062	52.5586	19.8656	40.6413	1.98046	9.75537	0.037105	0.008232	100.303	100.303	29.2143	43.3666	2.01712	7.76667	0.0523729	0.01001	99.6795	99.7929	35.1062	54.6217	3.01438	8.75985	0.083718	0.012076	67.1694	80.2871	24.7672	40.0549	2.18475	8.12863	0.0483787	0.00912739	63.7826	77.3821	24.4784	39.6243	2.14545	7.82037	0.0469104	0.00902586	99.8903
JYAMBERE-BUG2013A-	18.0934	60.3332	12.4717	26.9422	1.32692	4.6078	0.011246	0.003475	31.8288	28.3112	17.1557	35.1861	1.79234	5.41635	0.022969	0.004976	100.294	100.294	27.6603	41.4119	2.00452	10.485	0.0535935	0.010609	99.7124	100.022	32.3202	44.8168	3.1289	8.20423	0.079108	0.01663	61.4666	72.7866	22.5451	37.4553	2.12517	6.97901	0.0404372	0.00856236	63.573	74.8865	22.6466	37.7739	2.14953	7.56441	0.0441122	0.00872389	99.9012
RANGIMBILI	33.3554	66.7752	13.9803	32.7273	1.38694	5.09084	0.017482	0.004349	30.3611	42.8838	19.51	44.0271	1.77649	4.98501	0.034987	0.008966	100.481	100.481	35.2348	52.0497	2.13113	6.6707	0.0686899	0.012308	100.675	100.536	38.395	57.349	3.28633	10.3167	0.090062	0.020166	69.1857	80.3921	27.2704	47.3029	2.21517	8.20553	0.0580945	0.0103296	65.7357	77.3167	27.3868	46.2942	2.19922	7.43109	0.05281	0.010132	100.376
NDAMIRABAHINZI	23.073	61.9401	12.0464	28.5179	1.29615	6.91066	0.014424	0.004201	50.3374	56.6919	20.5585	40.433	2.09536	9.45164	0.033832	0.007327	100.396	100.396	26.9839	37.5274	1.97846	6.63536	0.0428614	0.00621	100.274	100.328	34.3668	57.157	3.41397	8.64358	0.09972	0.012099	69.4277	81.3333	23.4783	40.3755	2.1603	8.21179	0.0439723	0.00839882	66.9473	78.4491	23.06	39.9398	2.14928	7.88351	0.0451883	0.00848812	100.175
FAYADUME5	9.39885	48.2417	13.3843	22.0455	1.48322	5.63016	0.015249	0.004615	0	0.918024	15.493	26.0668	1.45383	4.1495	0.014709	0.004378	100.494	100.494	23.7288	31.7362	2.03669	8.32361	0.0471942	0.013176	99.6582	99.7217	26.9636	43.2587	4.18161	8.03188	0.105829	0.017073	54.3109	67.4189	20.0627	31.2641	2.2096	6.98741	0.0437228	0.00965259	56.9174	70.6496	20.0884	31.7702	2.20977	7.48056	0.045284	0.00975001	99.9839
SUPA	17.5672	55.0173	13.0416	31.3528	1.42589	5.33209	0.025407	0.006114	27.9945	62.9737	22.3579	43.3169	2.24151	8.23236	0.041738	0.007186	100.038	100.038	29.0256	45.1211	2.06178	10.3374	0.0636281	0.018786	100.181	100.309	39.1786	61.6701	3.93893	10.1802	0.125421	0.019818	63.0377	77.9364	25.0637	44.9241	2.2376	8.61075	0.0621929	0.0118801	62.9878	78.5701	25.1071	44.3459	2.2166	8.04592	0.0578405	0.0117446	99.9521
MLEKEALONGOLE	25.5616	69.5091	15.8925	28.5951	1.42302	6.30421	0.016775	0.007035	37.9794	56.4823	16.8871	35.8412	2.12167	8.03888	0.037859	0.012861	100.301	100.301	27.0123	41.2576	2.13236	8.18012	0.0656179	0.013047	101.842	101.202	32.2767	49.7284	3.56975	7.47864	0.104041	0.02111	65.4277	79.6549	23.2028	38.8882	2.2164	7.55168	0.0533398	0.0123586	65.9318	79.2669	23.0258	39.0667	2.22388	7.74653	0.0531602	0.0123408	100.734
SATO9	0	35.768	10.5941	25.8649	1.49343	4.66952	0.018239	0.005977	0.193182	21.4955	12.815	27.7684	1.69307	6.9482	0.015509	0.00282	100.29	100.29	21.0947	30.4124	1.98169	8.14921	0.0403364	0.007299	100.185	100.171	25.6267	36.2063	3.23383	9.51936	0.074412	0.013091	51.9717	65.5018	17.5902	30.7366	2.2265	7.32704	0.0435309	0.0090786	56.794	72.0799	17.9719	31.223	2.18688	7.54604	0.0418619	0.00910688	100.084
SUKARI	39.5206	74.2318	11.5266	32.0004	1.46949	3.99272	0.020864	0.004311	17.2696	52.2375	14.7104	41.2788	2.08024	9.40588	0.038652	0.010975	100.075	100.075	29.9049	46.67	2.14406	9.31964	0.0674491	0.015576	99.8431	99.8208	37.7763	57.3888	3.53105	12.1093	0.107642	0.016858	64.4191	78.3583	24.2749	44.5121	2.23583	8.23992	0.0588924	0.0106822	64.5006	78.7219	23.9434	43.8974	2.237	7.94313	0.0555042	0.0105606	99.8376
MBAWAMBILI	25.636	50.925	15.8711	34.3229	1.43835	5.56259	0.02393	0.005745	30.0157	47.7549	20.7048	39.3751	2.01283	6.7149	0.031981	0.004993	100.377	100.377	28.574	45.1953	1.92525	9.76837	0.0649017	0.014426	99.9074	100.047	28.8981	60.8245	3.50278	9.37958	0.096883	0.01085	61.2041	74.8988	23.5509	43.4298	2.23735	8.59149	0.0603727	0.0126626	62.7427	76.6862	24.0139	42.722	2.18808	8.26239	0.055118	0.0125007	100.05
UROO1IMPROVED	19.5419	56.8674	13.0922	32.7738	1.49604	5.63579	0.019481	0.008094	38.1729	73.9586	18.8634	41.8899	1.99357	9.32213	0.033652	0.007512	99.9568	99.9568	32.7566	47.5224	2.12786	10.0252	0.0782076	0.016814	100.725	100.514	34.7544	56.4292	3.91464	12.8095	0.127203	0.021942	62.5213	76.1376	25.127	44.4476	2.24503	8.64743	0.0623152	0.0129337	64.7683	79.9373	25.439	44.3269	2.24291	8.33717	0.0586945	0.0127867	100.119
DHAHABU	25.8381	53.2265	12.6707	29.9175	1.43476	4.63683	0.017526	0.003801	17.6472	36.3729	15.3568	36.4507	1.56215	6.67215	0.019779	0.008695	100.293	100.293	28.0636	42.193	1.93314	7.37613	0.0443224	0.008412	99.8932	99.9867	36.2138	57.3492	2.69272	9.68597	0.078051	0.011486	68.2343	80.2725	23.5002	41.4774	2.15688	7.6704	0.0452883	0.00876137	62.7423	75.1774	23.2586	41.0657	2.14703	7.44738	0.0434874	0.00867101	99.9713
KILOMBERO	14.7741	48.322	8.65439	32.2932	1.52629	4.19049	0.01914	0.004889	10.0194	18.8838	11.9178	35.3003	1.78498	6.5531	0.026729	0.007282	100.224	100.224	31.47	44.669	2.08079	10.14	0.0625015	0.015439	99.8829	100.037	35.6442	59.7321	3.62362	12.3358	0.108733	0.018806	60.0845	73.7078	23.2728	42.9697	2.23548	8.56823	0.0580556	0.0110392	60.137	72.7473	23.4707	42.6422	2.22183	7.93834	0.052334	0.0107873	99.9314
NERICA10	0	60.246	11.4478	20.9002	1.26347	5.5727	0.008725	0.004214	26.4808	64.3017	13.0614	32.8864	1.69486	6.37981	0.021377	0.005363	96.2827	96.2827	20.9862	31.5049	1.95298	9.34438	0.0417615	0.011305	99.9638	100.063	25.2096	37.0311	2.7384	10.0013	0.059902	0.013593	57.0979	76.5479	17.9796	30.6379	2.08171	8.04169	0.0347981	0.00893422	57.591	77.8544	18.0023	31.3922	2.11074	7.81718	0.0383708	0.00902298	97.9313
DUORADOPRECOSE	31.7364	65.4851	13.3849	32.6662	1.42999	5.94853	0.020348	0.005374	13.4121	33.6666	17.9441	40.0182	2.18609	9.41491	0.033163	0.007436	100.323	100.323	26.5189	40.7126	1.94981	10.5106	0.0542679	0.010188	99.7758	99.8818	35.588	53.4971	2.97399	9.30072	0.086617	0.016008	65.1577	78.8471	22.6479	40.1755	2.16816	8.44033	0.0473497	0.00985991	62.9493	75.9111	23.0131	41.3189	2.17464	8.18165	0.0495704	0.00997123	99.9409
IR16T1067	11.3093	58.1792	8.86219	22.6889	1.33643	3.88617	0.011868	0.002452	13.0485	46.4818	17.5012	32.0378	1.90156	5.20322	0.021393	0.005014	61.888	61.888	23.3833	37.4743	2.01226	7.6831	0.0344242	0.010336	71.323	71.5339	26.7371	46.409	3.78924	9.19236	0.102677	0.02375	27.1644	33.6373	12.1851	31.9701	2.08486	6.58129	0.0312245	0.00658218	30.0822	39.3609	12.9951	32.4222	2.11492	7.31567	0.0342592	0.0070456	53.1242
FAYADUME4	1.39965	35.5207	8.5769	21.281	1.33526	4.96054	0.014651	0.005666	5.10402	34.3333	14.7958	33.5679	2.10232	10.2716	0.036022	0.008429	98.2857	98.2857	19.7428	30.3266	2.05603	7.0413	0.0414658	0.008613	100.907	100.768	24.0941	41.5564	3.49136	7.65089	0.072501	0.012713	51.6289	66.6687	16.3908	30.7968	2.15511	6.69298	0.0390465	0.00956691	57.3406	73.1276	16.941	31.7937	2.17753	7.51841	0.0429038	0.00974099	99.3341
EDIGET-WAB189-B-B-BHB-	37.5379	71.5602	16.079	28.1375	1.49034	5.83456	0.019228	0.006437	41.4998	68.574	20.4187	39.3289	2.15504	9.45855	0.030293	0.00696	96.9535	96.9535	26.7359	41.2192	2.02366	9.4025	0.0541982	0.017009	99.7193	99.7642	31.526	51.3254	3.44066	11.6281	0.084689	0.019188	67.3254	78.3564	23.4054	39.754	2.15829	8.0265	0.0454099	0.0114174	66.5354	79.4296	23.2813	39.8402	2.21497	8.22806	0.0486047	0.0116118	98.1695
V18	20.4906	49.4444	10.418	23.4487	1.43586	5.57879	0.014568	0.005188	9.45663	38.8334	12.7931	31.63	1.70535	8.87981	0.025669	0.008439	93.743	93.743	21.2236	28.9111	2.03627	7.85905	0.0378173	0.011496	99.8762	99.7907	27.0648	44.6776	3.66849	9.63046	0.083574	0.019171	58.6458	71.2933	17.9887	31.6094	2.18364	7.53021	0.0395172	0.0103669	58.8751	73.1097	18.2231	32.2589	2.19156	7.82394	0.0417225	0.0104158	96.5415
MBAWAYANJIWA	4.78998	37.8895	9.4135	29.0576	1.35557	5.46229	0.01846	0.004103	21.1227	30.934	16.135	38.3786	2.08086	9.82164	0.035706	0.011061	99.8628	99.8628	32.9301	45.8805	2.04024	9.12001	0.0474077	0.018425	99.6546	99.7442	40.7638	60.8102	3.48628	10.9595	0.140593	0.018991	69.4118	79.7174	22.4363	42.0845	2.19776	8.32465	0.0503777	0.0125481	66.3073	77.2679	22.3223	41.7414	2.18399	8.01061	0.0483848	0.0124324	100.174
MDOMOWAFISI	27.7409	70.2377	12.2449	31.0694	1.47652	4.96363	0.020062	0.006463	0	15.655	14.0064	41.051	1.93864	6.36282	0.029128	0.008936	99.8338	99.8338	27.1428	44.9872	2.14892	9.19875	0.0610581	0.015528	100.72	100.433	37.7555	58.8784	3.72761	13.1743	0.130454	0.026354	60.9193	74.6117	23.4362	43.1966	2.23013	8.53221	0.0586758	0.0124576	60.4983	74.2275	23.0481	43.3528	2.23848	7.98289	0.054096	0.0122906	100.054
GAMTI	24.2069	71.8334	12.2146	30.133	1.40806	5.73663	0.016817	0.005907	11.277	21.1587	14.9927	39.2133	1.83969	7.67629	0.026679	0.005897	100.325	100.325	29.3376	45.7685	2.09763	11.0847	0.0680274	0.017317	100.291	100.443	38.5706	54.9034	3.43884	10.0556	0.108279	0.019683	63.7473	75.485	24.0516	42.9216	2.21621	8.35926	0.0542488	0.0113513	61.6329	74.9725	24.0046	42.3735	2.20058	8.14018	0.0527118	0.0112694	100.145
MSONGA	0.151382	43.54	9.18407	23.7587	1.35578	3.55518	0.012525	0.003609	0	22.7204	14.6925	27.5248	1.55513	6.13319	0.017508	0.005936	100.657	100.657	20.5718	29.2132	1.93915	9.2877	0.0375645	0.0085	101.077	100.66	24.1594	41.4731	3.11895	6.42601	0.064655	0.012175	50.1851	65.4929	17.1434	30.3149	2.12724	6.77727	0.035267	0.00819917	57.085	73.1153	17.4882	31.1547	2.13349	7.1743	0.0385313	0.00828972	100.628
SINDANOKUBWA	55.2678	86.7831	14.7766	29.8794	1.48029	4.46831	0.014761	0.00473	33.7304	78.6671	18.6568	38.4004	1.92599	7.2975	0.031166	0.007382	100.534	100.534	28.3013	40.583	2.06799	9.11269	0.046343	0.013149	99.9207	99.9139	36.4795	56.849	3.85074	9.4538	0.114077	0.016422	69.5939	82.9126	23.2208	40.0889	2.12097	7.82202	0.0417875	0.00984927	69.0389	83.1776	24.24	40.8176	2.22171	7.63682	0.0469582	0.0100173	100.107
SATO1	19.217	56.2088	9.09196	23.6118	1.47759	4.19115	0.015464	0.004973	12.2053	39.2751	10.4532	29.0159	1.69103	6.51653	0.017146	0.001495	100.489	100.489	22.2111	30.3801	2.10379	8.74353	0.0409394	0.010757	99.6246	99.862	27.2218	40.0141	4.26498	10.3555	0.095198	0.016309	54.6918	67.7037	18.2306	30.7565	2.24034	7.20583	0.0427472	0.00926524	61.0834	75.8285	18.2162	31.5547	2.23073	7.58726	0.0430073	0.00931431	99.9702
BASMATI	34.3158	79.5975	14.2187	27.0612	1.41893	5.20354	0.015239	0.007015	56.129	71.7261	23.1334	31.9311	1.94852	7.23796	0.025331	0.009767	100.258	100.258	20.8307	30.1389	2.00867	7.42237	0.0436895	0.011797	98.2248	98.2563	26.9768	42.4027	3.41277	8.28779	0.072079	0.014076	63.8767	76.1818	19.9456	32.6025	2.17011	7.24836	0.0389207	0.0110716	68.7377	81.0244	20.1356	33.2399	2.18459	7.48578	0.04274	0.0112124	99.2981
MBAWAMBILIRANGIMBILI	27.073	50.7725	13.1661	30.9961	1.47145	4.93423	0.01703	0.007817	41.7448	54.481	22.4865	43.44	2.278	11.4086	0.044719	0.016271	100.181	100.181	25.269	39.7083	1.90145	9.91244	0.055466	0.011267	100.558	100.648	31.2562	56.7016	3.43953	8.10003	0.093771	0.01442	69.9649	81.689	24.2942	44.1776	2.20224	7.61591	0.0525829	0.0112436	67.16	79.1274	24.0908	43.5831	2.21231	7.61768	0.0517701	0.0112195	100.058
BR	59.3048	69.8491	27.0212	35.8168	1.51094	4.77493	0.027717	0.006343	57.5559	69.651	27.8161	47.7311	2.3159	7.10623	0.043042	0.010759	100.512	100.512	32.2038	48.3117	2.08787	9.56095	0.0560981	0.016627	99.7058	99.8764	39.61	63.1249	3.18052	8.1953	0.097528	0.012255	76.1516	82.3359	30.5824	48.1133	2.22613	7.8441	0.0553212	0.01139	72.9393	80.6383	29.9769	47.546	2.23749	7.62306	0.0549008	0.0114169	100.009
SALINAS27	9.54554	44.9059	13.0473	26.525	1.34752	3.93182	0.012545	0.003168	2.30843	33.6065	15.5909	29.9337	1.85146	6.51723	0.019226	0.003738	97.047	97.047	17.4645	27.0001	1.97117	6.59717	0.0303793	0.007045	96.5892	96.4833	21.6608	38.2875	3.15017	5.63435	0.062358	0.008468	54.5727	70.4707	16.0442	29.7787	2.14301	6.60246	0.0332098	0.00701066	56.6518	72.1892	16.4329	30.5774	2.15246	6.96279	0.0361599	0.00713338	96.984
THEMANINI	18.111	59.0188	11.2555	29.5069	1.37398	5.10689	0.013476	0.005202	20.1527	31.6692	20.0996	30.2991	1.57297	4.27921	0.019855	0.004707	100.695	100.695	27.8443	40.752	1.90294	11.2665	0.0484927	0.011877	100.103	100.118	37.3736	56.2805	2.99648	9.56817	0.086614	0.016972	66.4905	78.7771	23.8706	39.9794	2.16937	8.19125	0.0454703	0.0100371	62.2012	75.298	23.6022	39.613	2.1316	7.83794	0.0439667	0.00991778	100.265
SUPAUKEREWE	42.8991	78.6156	12.5404	32.8134	1.48074	4.56501	0.01843	0.006086	15.3051	28.3936	18.1336	38.2583	1.9544	7.01317	0.026269	0.0082	100.534	100.534	28.0537	45.3969	2.12797	9.74333	0.0678384	0.01724	99.9136	99.8027	42.3133	62.0401	4.08253	11.907	0.125766	0.029422	68.406	79.7681	24.767	44.3912	2.24798	8.21392	0.0575277	0.0125171	64.8518	76.4684	24.5938	43.9122	2.24063	7.88544	0.0544545	0.0124301	100.106
INGWIZABUKUNGUUL26	29.1303	60.5282	10.7578	26.7354	1.50012	7.31018	0.014337	0.004643	18.7821	40.9198	14.1408	35.9797	2.03846	8.6079	0.033524	0.009071	100.481	100.481	25.5472	39.3892	2.04367	10.7133	0.0461584	0.012835	100.191	100.173	30.0357	53.2647	3.45891	9.74468	0.10248	0.013369	65.2946	79.1118	20.7651	38.4532	2.17383	8.42588	0.0440895	0.00978708	63.4804	76.4676	20.6821	38.6047	2.21845	8.41103	0.0462177	0.00991671	100.187
KIHOGORED	42.8047	61.701	15.7153	34.636	1.45686	6.22807	0.025907	0.009175	43.538	62.4451	22.0712	44.8644	2.07908	7.04955	0.041565	0.012716	100.138	100.138	30.5624	48.5667	2.13507	10.0393	0.0631717	0.017681	100.034	100.159	37.2503	58.3995	3.75227	11.1803	0.115412	0.024083	71.4854	81.207	26.3741	46.4784	2.24644	8.46321	0.0598978	0.0144384	68.5718	78.9684	25.8991	46.009	2.23506	8.13907	0.0571988	0.0143256	99.9452
BKN-SUPA	42.3789	80.02	14.9565	30.2816	1.47639	5.68967	0.021783	0.007928	26.1635	38.6416	16.6391	39.0932	1.92655	3.44414	0.023185	0.005056	99.8668	99.8668	26.7127	42.6667	1.93486	7.22649	0.0482663	0.013803	99.9324	100.139	30.5082	51.3187	3.52666	9.60391	0.106027	0.019549	64.8519	77.0267	22.4048	40.8398	2.16989	7.11036	0.0480788	0.0119922	66.0552	77.6471	22.457	40.7834	2.18356	7.46675	0.0489722	0.012012	99.7638
ANGOLASTAR	29.8877	68.0886	12.0974	32.8706	1.45317	6.38396	0.019829	0.007891	6.54525	24.5161	12.7124	37.524	1.91495	7.81445	0.025475	0.007872	100.044	100.044	31.5766	45.6285	2.09234	10.5511	0.0635817	0.015668	100.326	100.206	36.85	56.7498	3.47736	10.7994	0.127066	0.021051	60.1376	73.5517	24.1196	43.8299	2.23664	8.5455	0.0591746	0.0126617	61.8227	75.0797	24.3316	42.9924	2.2139	8.25097	0.0537753	0.0125118	100.011
IR16T1348	0.948633	20.3987							5.90702	6.37508		28.9863	1.56449	5.46065	0.014832	0.002035	38.2938	38.2938	14.5207	34.6543	1.90191	7.61725	0.0177768	0.009864	62.8683	63.0986	21.533	38.3627	2.40203	7.6889	0.053007	0.008698	30.4068	41.0733	13.1043	26.0783	2.02438	6.20856	0.0218741	0.00676612	36.6502	48.071	14.0252	27.3878	2.09086	7.06498	0.0290986	0.00712149	69.0662
BASMATI217	0	36.5684	11.4606	29.4565	1.36557	4.44744	0.015474	0.004005	9.70471	6.5253	12.1394	34.3087	1.43966	6.75083	0.01069	0.003489	100.278	100.278	20.9592	34.8599	1.84285	6.76632	0.0315021	0.008751	99.6287	99.7811	32.6006	47.4076	2.65296	8.98749	0.070132	0.011438	51.8649	65.7716	18.3996	34.9132	2.06423	7.11696	0.032722	0.00811767	57.6218	70.2458	19.2632	36.6238	2.10582	7.31805	0.0379635	0.00825095	99.859
BR153	4.08455	33.9218	13.4415	31.9215	1.46781	4.6006	0.016665	0.004577	16.1653	43.1576	16.8982	31.7047	1.80133	6.2128	0.025758	0.004436	100.36	100.36	24.7343	30.9658	1.97214	8.30177	0.0411245	0.013042	101.374	101.033	28.7349	41.698	3.58071	8.49479	0.07851	0.016049	60.3266	74.9241	20.9905	34.0086	2.15444	6.93052	0.038977	0.00933708	59.8517	74.6859	21.0391	34.5348	2.18635	7.40855	0.043059	0.00951941	100.586
IR117831-11-1RGA-1RGA-1RGA-1	0	25.5568		22.5875	1.29821	2.78389	0.010033	0.001611	2.32256	26.8698		25.4447	1.4069	4.57055	0.01391	0.002177	83.5992	83.5992	22.7862	31.1502	2.00346	6.86179	0.0393126	0.012691	91.6681	96.5987	23.1584	40.7864	2.47999	6.15905	0.05214	0.010727	44.2251	62.1663	18.7962	30.3232	2.06339	6.10052	0.0318528	0.00712183	48.2277	65.6999	18.489	31.0801	2.1296	6.79743	0.0368944	0.00741611	88.0571
KIALANGAWA	11.5301	43.1259		24.0862	1.3089	6.18758	0.011674	0.003653	3.19767	16.1969	12.0424	35.6384	1.97636	6.93003	0.025717	0.005709	100.205	100.205	26.5542	44.6801	2.04012	8.14405	0.0462008	0.010976	101.071	100.669	32.3589	49.7774	2.7973	9.03135	0.072437	0.01282	58.8417	71.7578	21.2804	39.2823	2.16169	7.8474	0.0427258	0.00869749	59.0291	72.1464	21.6543	38.9882	2.15339	7.7843	0.0421017	0.00866154	100.387
BASMATI370	0	40.5686	10.1038	23.0661	1.29408	3.54038	0.010793	0.003531	0	9.42516	9.50037	30.6251	1.36166	5.49736	0.015646	0.002891	100.317	100.317	21.2272	32.5992	1.85248	9.2868	0.0303434	0.012895	100.102	100.229	30.4258	45.144	2.96114	7.20742	0.054002	0.010768	52.1379	66.0485	18.5908	34.5048	2.06756	7.16084	0.032022	0.00828233	55.1271	71.1017	18.4109	33.2799	2.09514	7.30821	0.0346279	0.00844751	100.066
KANIKI	29.2768	66.5579	17.3866	31.975	1.46875	4.8698	0.016941	0.004748	59.5353	81.623	27.0972	49.2007	2.39386	13.0637	0.039775	0.009308	100.238	100.238	30.5584	44.1654	2.05069	11.0769	0.0564159	0.014009	100.435	100.158	37.5636	56.4315	3.28755	10.5903	0.101911	0.019619	74.1889	85.5473	27.3383	45.1258	2.22978	8.46874	0.0525314	0.0107353	69.006	81.6285	26.9542	44.4124	2.22091	8.43913	0.0507423	0.0106292	100.156
HUA565	0	49.0709	14.6054	27.1426	1.49435	7.02725	0.020469	0.007376	20.2836	43.1914	11.8044	31.7675	1.71441	7.48128	0.026228	0.003936	100.41	100.41	18.8479	30.3647	1.96715	9.47027	0.0335184	0.012549	99.9677	100.024	25.4009	43.6071	2.99989	9.59693	0.073072	0.016387	56.0877	71.8566	17.4246	32.6894	2.1501	7.46316	0.0383103	0.0108507	59.3787	75.6873	17.7246	33.5091	2.18173	8.1286	0.0421568	0.0109803	100.061
IRRI77713-VYUNINZARA-	22.2934	64.6846	11.9454	25.5312	1.51157	4.71518	0.018078	0.006362	13.3239	41.0499	18.011	36.6305	2.08411	11.309	0.038949	0.012985	100.131	100.131	24.902	34.3608	2.10937	8.42766	0.051701	0.014221	100.334	100.264	27.7544	39.7649	3.7927	8.23791	0.079124	0.009837	59.2596	74.3921	20.5882	33.982	2.2615	7.7363	0.0476992	0.0110191	61.7383	76.7641	20.6999	34.352	2.24256	7.71844	0.0477856	0.0109781	100.06
BW196	10.3523	46.7705	10.7386	30.1034	1.39457	4.63407	0.017193	0.00488	0.715082	20.0815	20.1364	31.4703	1.65106	6.15099	0.018235	0.004721	99.9317	99.9317	21.8156	41.0538	2.02831	9.2474	0.0436088	0.008753	99.7872	99.8217	28.3444	50.6357	3.33082	8.73386	0.087228	0.017101	57.0072	70.2568	19.2726	38.4399	2.16893	7.35885	0.0420934	0.00913049	58.2171	72.6463	19.4997	38.593	2.17294	7.56272	0.0432074	0.00915577	99.7395
KUNGAHARA-BUG2011A-	11.9755	55.7605	9.54796	23.5526	1.23042	5.19065	0.010618	0.003539	16.3603	46.5761	18.7924	33.1023	1.58934	5.31428	0.018276	0.003063	100.257	100.257	25.2609	33.8076	1.78495	6.45737	0.0302184	0.006124	99.7845	99.8536	26.1944	42.2025	3.31299	6.70377	0.063999	0.011959	56.17	75.1924	20.0726	32.9692	2.08525	6.99081	0.0330279	0.00749876	60.564	76.5606	20.2999	33.7013	2.06668	7.09576	0.0358874	0.00757706	99.9088
WAYA	5.6971	27.3877		34.3977	1.47021	6.20221	0.019364	0.00726	0	5.11395	8.48602	31.3596	1.42297	3.29448	0.015808	0.001648	100.426	100.426	24.1728	42.5788	1.94307	9.32518	0.0457166	0.011725	99.7875	99.9354	30.5518	51.4618	3.20204	9.47236	0.087163	0.012449	58.0485	71.2256	19.0913	40.1945	2.16851	7.70457	0.0438844	0.00977434	55.9736	69.4357	19.1601	40.0418	2.15435	7.57968	0.0441633	0.0097597	100
INTSINDAGIRABIGEGA	1.4548	48.7621	10.8082	26.3272	1.50483	4.3385	0.017662	0.007169	0	19.4587	11.9072	27.8496	1.46338	5.6486	0.014604	0.001856	100.456	100.456	24.0818	36.5631	2.10726	8.4195	0.0555873	0.013079	99.907	100.085	32.2928	47.7029	4.10189	11.1723	0.113161	0.020407	53.5409	69.6238	20.063	34.7839	2.22178	7.48155	0.0469573	0.0109052	56.7986	72.9527	20.3373	35.1881	2.22537	7.54655	0.0483795	0.0109461	100.063
ITA310	21.2698	59.0417	11.3276	26.6123	1.37508	5.34404	0.014538	0.005784	30.9169	61.8305	17.5658	37.8047	1.92211	5.71597	0.028997	0.005487	100.523	100.523	22.2518	32.4731	1.96907	7.36752	0.0318581	0.008538	99.7977	99.8834	28.7067	43.1978	3.26002	8.28766	0.079606	0.010595	64.659	80.7747	19.633	34.7139	2.16661	7.08581	0.0375913	0.00926103	63.991	78.7955	19.7059	35.093	2.15986	7.37346	0.0401942	0.00930006	100.054
MZINGA	8.16151	46.5074	10.1384	29.3828	1.33452	5.52838	0.012221	0.004349	18.5375	46.267	15.3086	38.3499	1.59019	6.74526	0.025955	0.006064	100.123	100.123	21.5156	32.1582	1.69837	7.4818	0.0260637	0.008294	89.0796	97.0516	26.7386	48.3189	2.36884	8.79767	0.058984	0.008606	58.7262	76.123	18.6555	36.5803	2.06942	7.587	0.0330173	0.00826257	57.7905	74.8632	18.5476	36.6911	2.06218	7.55154	0.0360459	0.0084074	95.5346
IR14D121	24.5382	57.8521	11.5392	20.9311	1.41573	4.17035	0.014429	0.004281	50.0073	78.8221	16.5583	31.8095	2.23032	7.63098	0.038275	0.012156	100.106	100.106	18.9466	26.1036	2.01869	7.6511	0.0465681	0.012159	100.472	100.502	24.8834	40.0339	3.12911	8.34074	0.067631	0.010863	39.7968	53.3557	19.2263	34.8587	2.14348	6.56452	0.0399898	0.00849259	41.6795	56.8489	19.317	35.1263	2.16728	7.2037	0.0438769	0.00871237	68.7418
NZAHARA	2.69031	46.5808	14.0035	26.3654	1.50639	6.20357	0.017003	0.0061	3.99098	41.0843	10.944	27.9407	1.58793	5.46179	0.01267	0.004136	100.033	100.033	21.4348	32.1095	1.94944	8.37473	0.0395983	0.010715	100.197	100.136	26.378	43.1658	3.55429	10.7571	0.081208	0.016677	54.2222	73.8685	19.0025	32.5954	2.14829	7.27845	0.0383776	0.00996078	57.7156	75.1766	18.8564	33.0568	2.18376	7.80156	0.0413211	0.0100665	99.9529
YUNYIN	0	0.433992							0	0							62.0772	62.0772	16.9112	36.8467	2.01265	7.27213	0.0391772	0.010906	54.4244	60.8128	25.4371	35.6511	2.65188	7.80301	0.026236	0.008944	27.0708	39.4524	16.5459	33.3145	2.13516	7.48077	0.035034	0.00764223	31.9788	43.4077	15.1753	33.3171	2.16792	7.40143	0.0351315	0.00805046	62.2264
CIHERANGSUB1	8.87983	38.9984		22.1616	1.35396	4.13998	0.010415	0.003276	5.69522	23.547		23.374	1.46782	5.14501	0.014653	0.002881	100.167	100.167	20.6748	29.5818	2.04359	7.75686	0.0407346	0.010657	100.178	100.163	25.3985	44.4363	3.51419	7.16781	0.074549	0.013253	62.3743	73.4482	17.3994	30.2596	2.15379	6.74462	0.0370673	0.007949	57.7745	71.4812	17.3685	30.5342	2.1623	6.98661	0.0385515	0.00806103	100.065
CIHERANGSUB1AG1	1.96942	45.0894	8.59975	21.993	1.4056	3.82943	0.014107	0.003314	4.42415	37.3425	11.8027	27.1174	1.74429	5.46699	0.018152	0.003353	99.9886	99.9886	19.307	28.8348	1.85527	6.53719	0.0323111	0.007296	99.7695	99.7771	26.0128	41.2713	3.27603	8.14707	0.069211	0.013902	52.9063	67.8356	16.355	29.4976	2.03132	5.84241	0.0309488	0.00744935	56.2154	73.8732	16.5949	30.2345	2.12735	6.84209	0.0372187	0.00768879	99.8046
CIHERANGSUB1AG1AG2	65.0646	88.6571	12.032	25.7626	1.459	5.89241	0.021633	0.00583	62.2309	81.4601	17.6058	33.0852	2.10752	7.48416	0.033331	0.006813	100.209	100.209	23.0826	33.3198	2.0036	8.09627	0.0489838	0.010897	99.5868	99.6932	28.2703	42.3897	3.69379	9.25	0.090915	0.0175	69.6859	77.8592	19.7387	33.6259	2.16313	6.95346	0.0460626	0.0102123	75.7494	84.8189	20.0662	34.0092	2.20739	7.76742	0.0488686	0.0103564	99.8485
FR13A	0	12.8162	9.06281	23.3028	1.40309	3.93021	0.015802	0.003302	1.25854	4.37047	9.04971	29.7835	1.60851	3.76982	0.02086	0.001595	100.354	100.354	23.7902	34.5623	1.97371	8.32988	0.0465721	0.009065	100.284	100.336	31.8492	50.2462	3.23319	9.06469	0.094595	0.013003	50.8056	62.8396	19.1875	34.6623	2.15249	7.2186	0.0442475	0.00782669	53.7511	66.0604	19.5702	34.813	2.1606	7.20279	0.0450972	0.00786707	100.209
IR64	0	25.7528		18.3998	1.30616	3.87904	0.010174	0.002632	11.641	20.2149							88.7267	88.7267	14.2651	27.8291	1.74057	7.83007	0.0397348	0.006564	93.7081	93.5956	19.7998	33.0096	2.83779	5.86563	0.047456	0.010715	55.4038	70.1961	19.6064	32.8219	2.12637	6.78987	0.0376281	0.010058	60.4836	75.6981	19.6053	33.2619	2.15021	7.49937	0.0405654	0.0101863	100.003
KHAOHLANON	20.538	44.4231	13.323	31.2272	1.34225	3.37832	0.012732	0.00283	21.0949	34.1845	18.3422	37.9819	1.53761	3.72739	0.018508	0.00232	100.176	100.176	32.4715	48.5384	1.88986	7.62904	0.0384523	0.007199	99.1515	99.0801	38.8549	59.4784	2.62888	6.78615	0.081448	0.011652	63.7134	74.9735	26.228	44.1735	2.10824	6.52057	0.0381433	0.00699884	61.8419	73.2193	26.1468	44.2866	2.09958	6.62538	0.0396796	0.00709998	99.6596
MAZHANRED	0	24.2416	8.32363	18.9979	1.40347	4.42502	0.008318	0.002622	6.33302	14.6863	11.0733	21.1355	1.31471	5.41613	0.014931	0.004495	100.424	100.424	20.8042	30.3721	1.87128	7.63256	0.0496193	0.007102	99.8965	100.074	25.1536	38.7769	3.4828	7.02916	0.064137	0.011556	68.148	79.9887	24.6762	42.8995	2.18858	7.38606	0.0475788	0.00871415	65.7329	77.5947	24.4703	42.6294	2.18237	7.38511	0.0476583	0.00870969	100.175
SWARNASUB1	0	30.3364	10.9704	19.5983	1.24995	3.76764	0.006076	0.001612	4.4061	15.5359	14.2647	23.0366	1.39506	5.30721	0.015495	0.002335	100.12	100.12	18.8844	29.0548	1.81307	7.34887	0.026377	0.006451	99.33	99.2702	24.6718	39.5399	2.35597	8.04328	0.052157	0.008236	53.9937	67.2039	16.86	28.2757	2.02162	6.93883	0.0273487	0.00591786	55.8642	69.1684	16.9052	28.8573	2.04348	6.985	0.0305821	0.00600864	99.701
[truncated: 15 more columns]
